# Supplementary material for: Enantioselective synthesis of naturally occurring isoquinoline alkaloids: (S)-(−)-trolline and (R)-(+)-oleracein E
Source: Royal Society of Chemistry journal article supplement (doi:10.1039/c7qo00062f), 2017-01-01
Supplement: c7qo00062f1.pdf [file c7qo00062f1.pdf]

## Enantioselective Synthesis of Naturally Occurring Isoquinoline

### Alkaloids: (*S*)-(-)-Trolline and (*R*)-(+)-Oleracein E

Weilong Lin,<sup>a</sup> and Shengming Ma<sup>\*a,b</sup>

<sup>a</sup> State Key Laboratory of Organometallic Chemistry, Shanghai Institute of Organic Chemistry, Chinese Academy of Sciences, 345 Lingling Lu, Shanghai 200032, P. R. China

<sup>b</sup> Department of Chemistry, Fudan University, 220 Handan Lu, Shanghai 200433, P.R. China

Email: [masm@sioc.ac.cn](mailto:masm@sioc.ac.cn)

Supporting Information

IM-8-72H-400M  
Jan 5 2017  
SOLVENT: CDCl3  
NA = 8

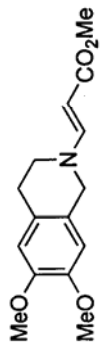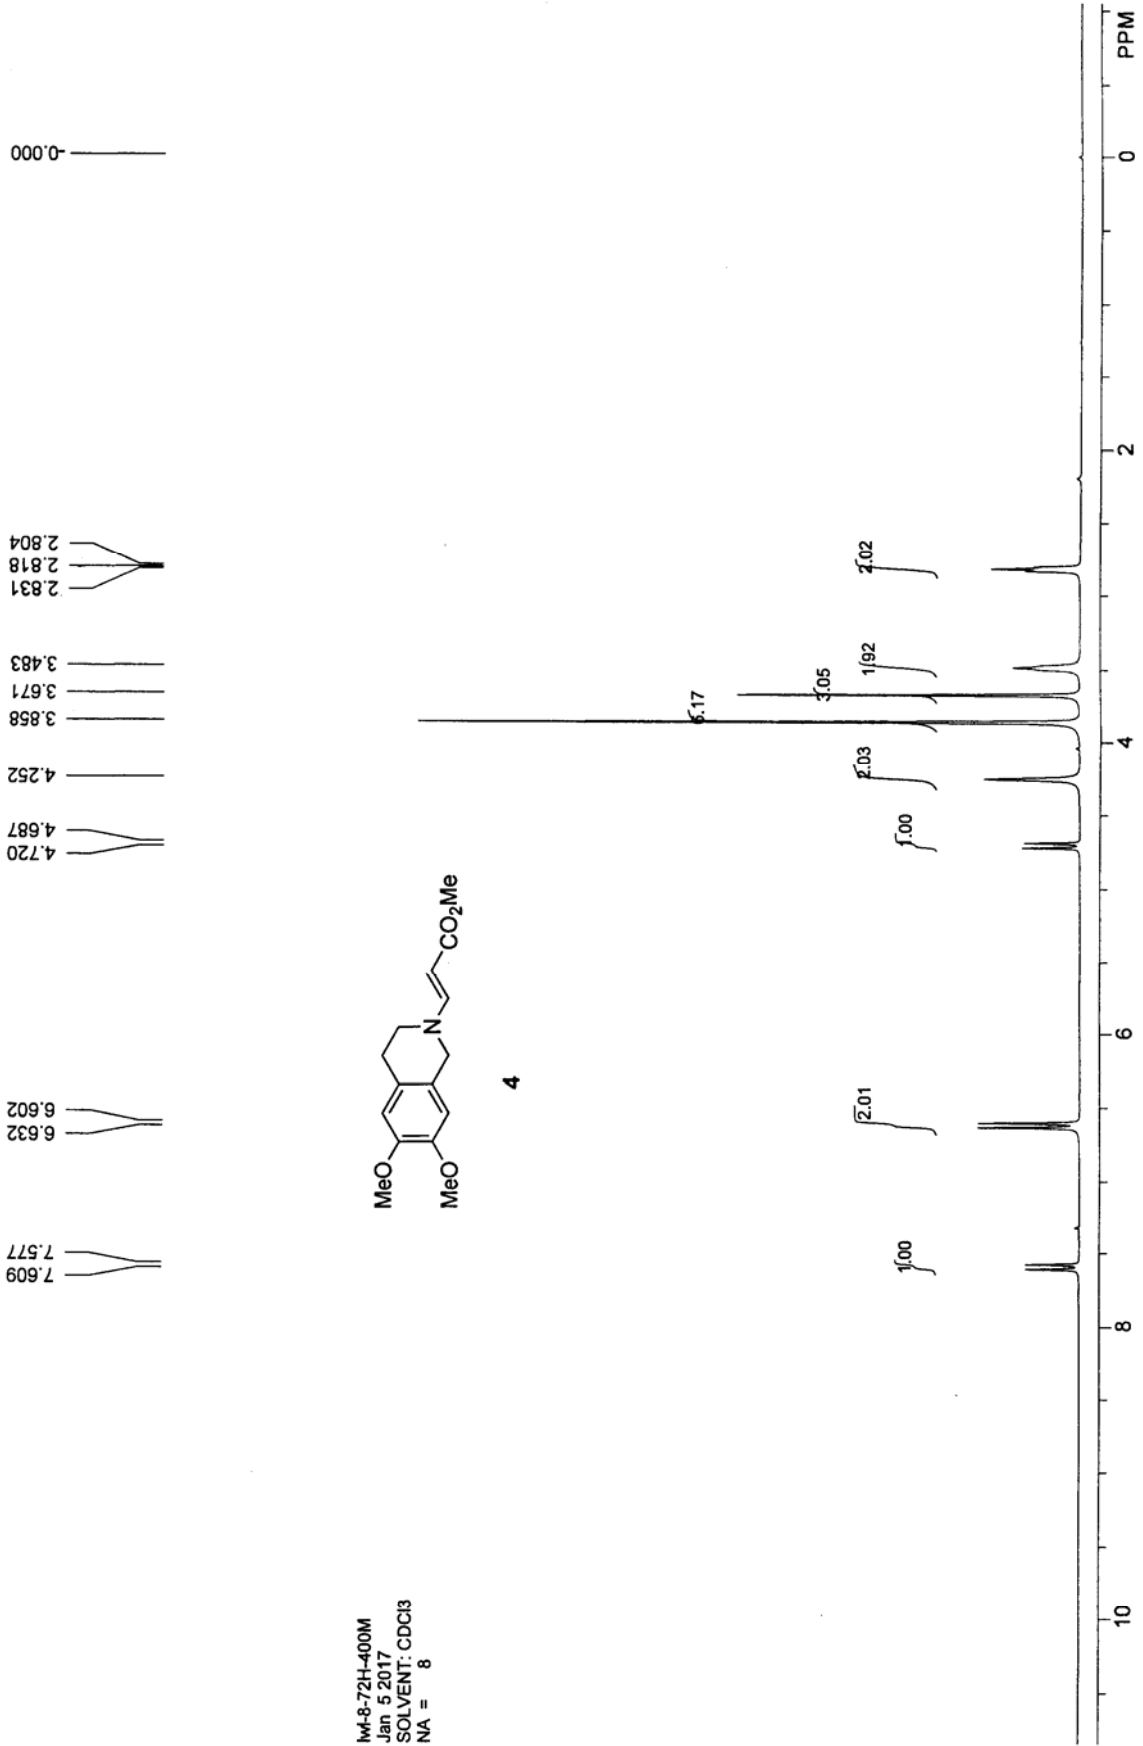

hwt-6-72C-400M  
Jan 6 2017  
SOLVENT: cdcl3  
NA = 48

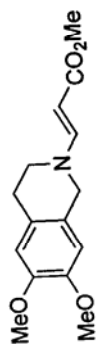

4

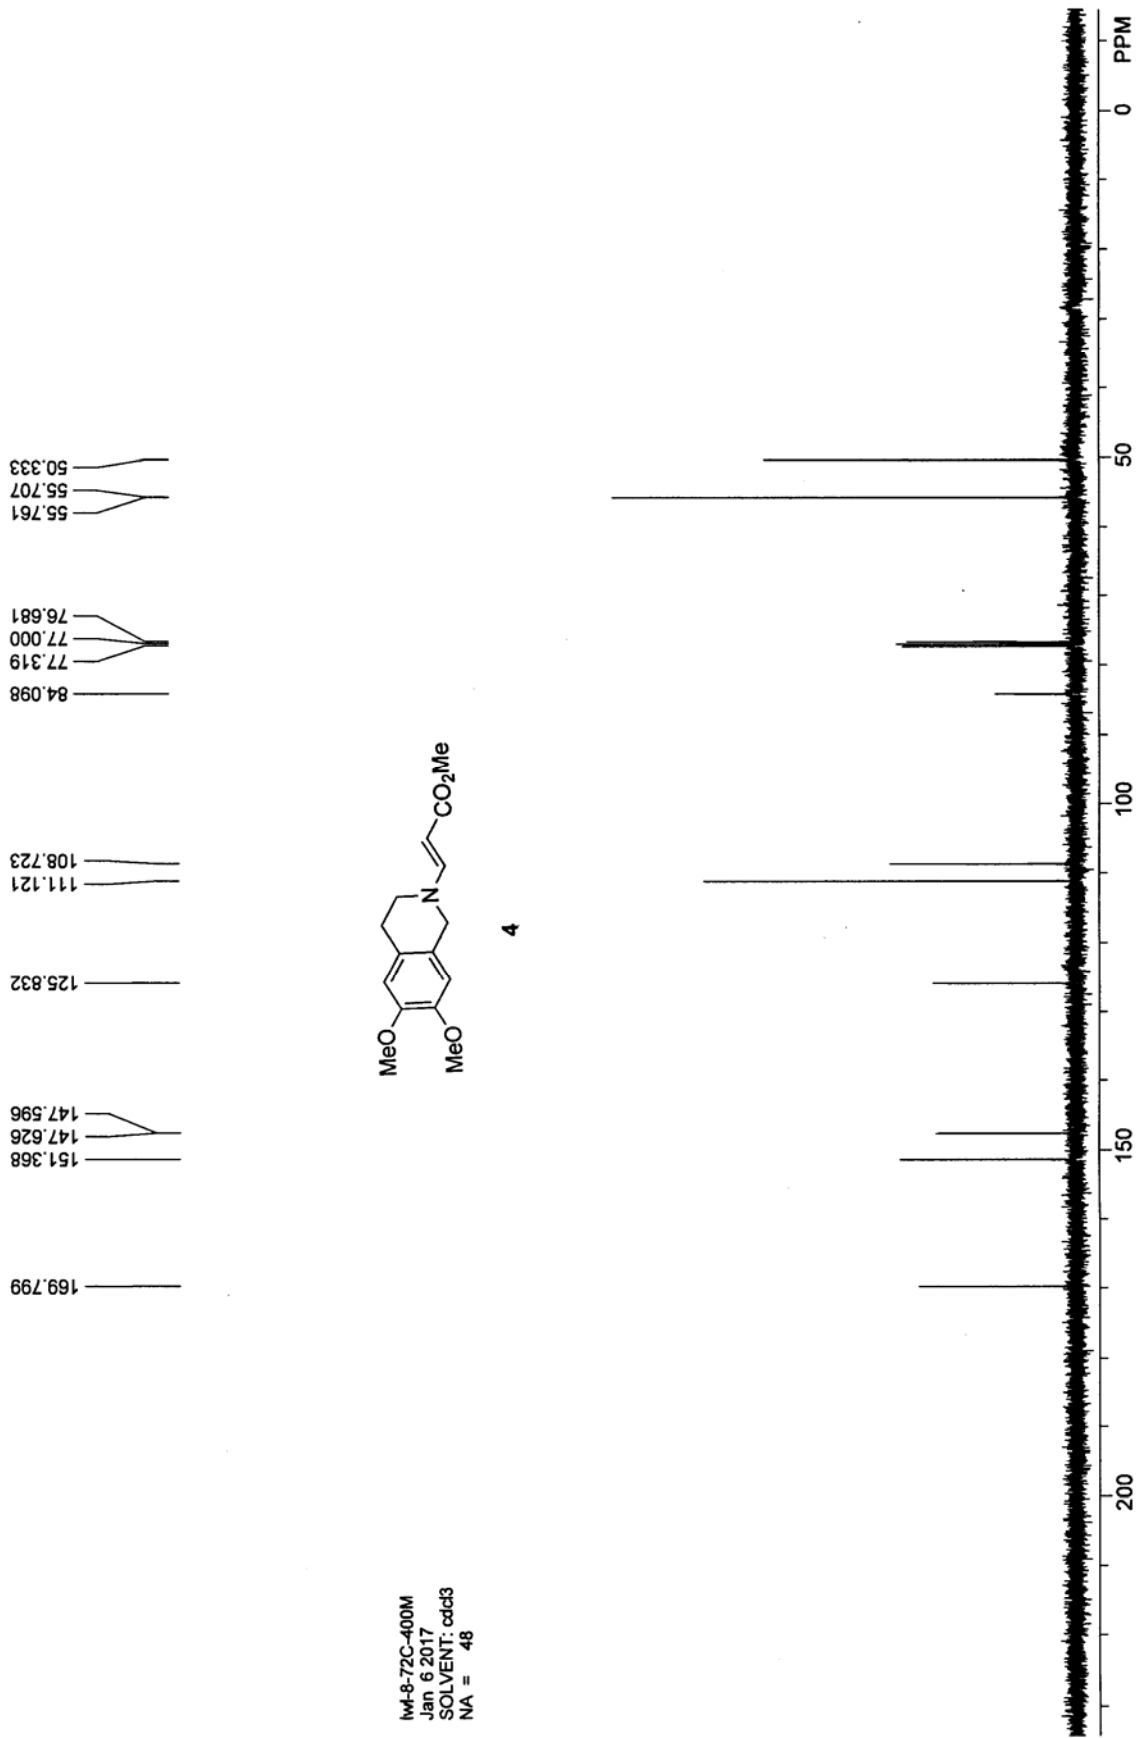

hw-9-93H-400M  
May 16 2016  
SOLVENT: CDCl3  
NA = 8

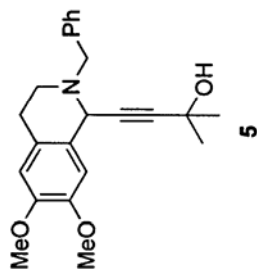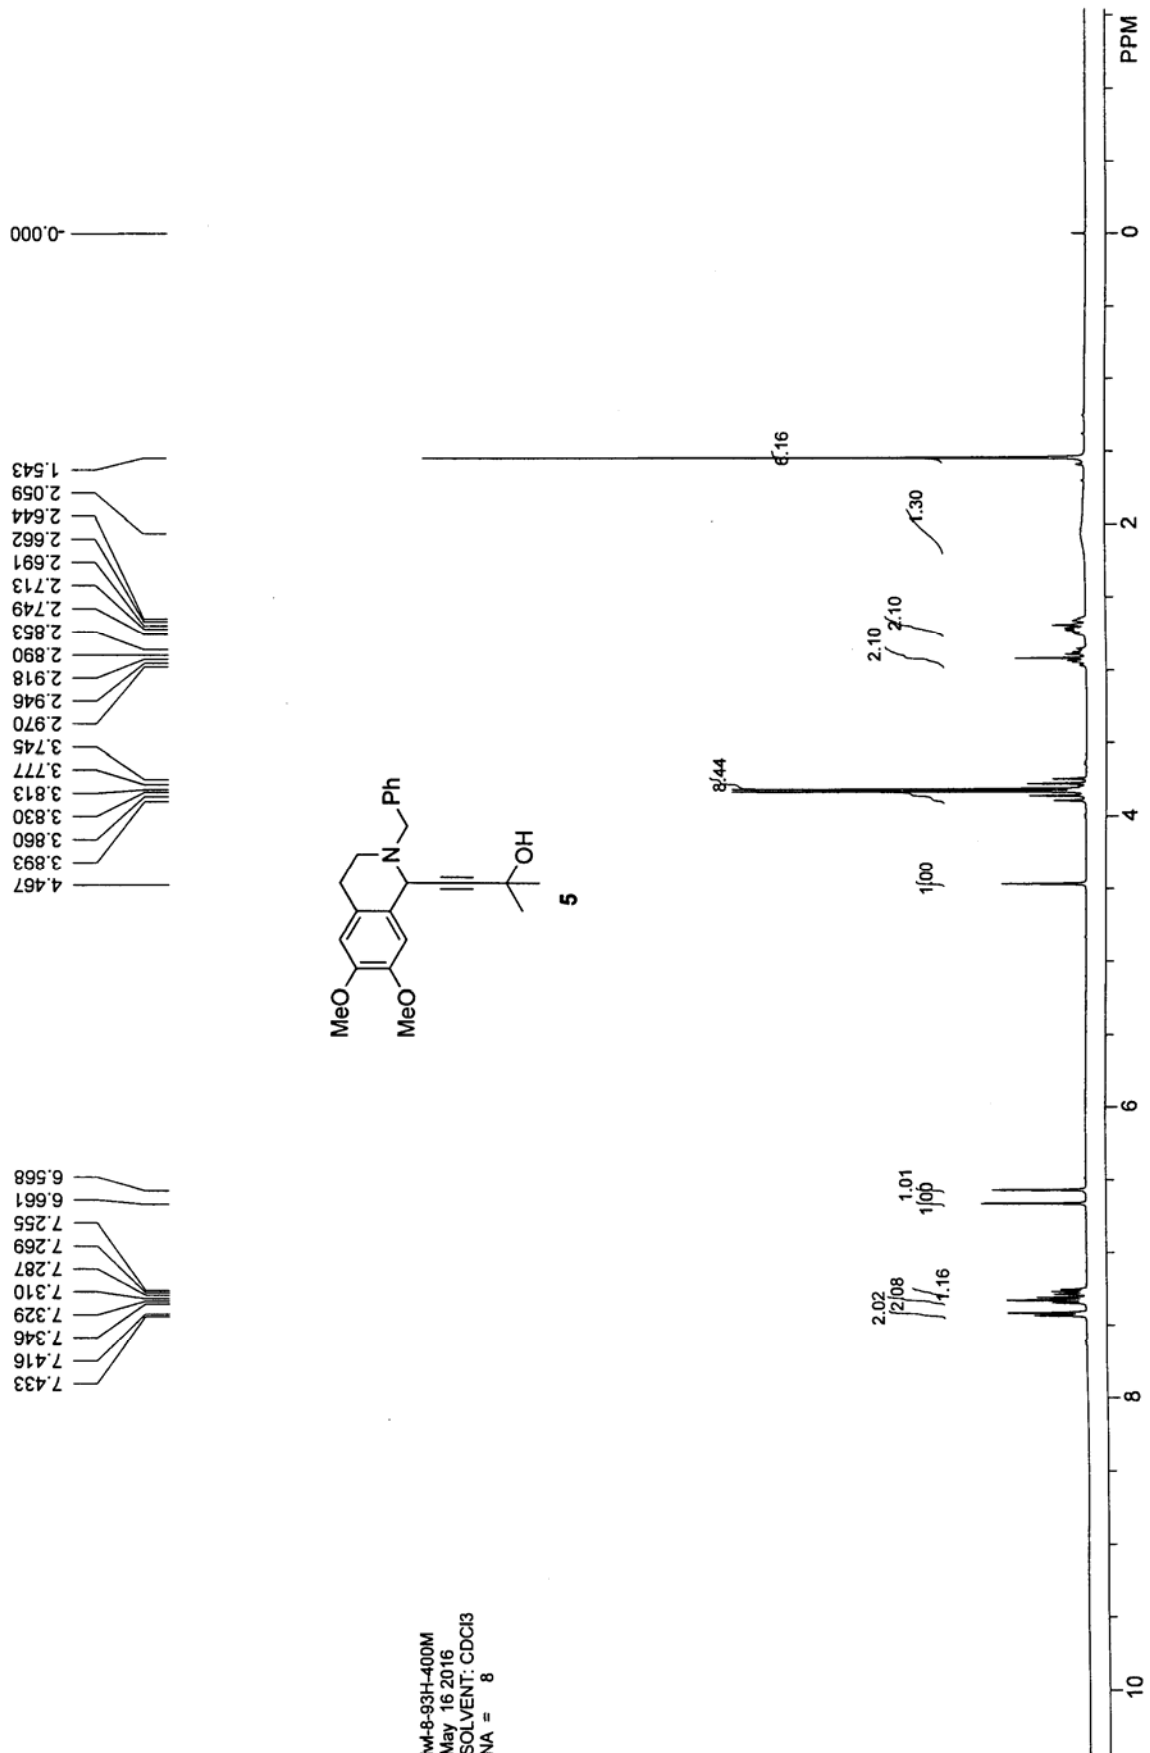

hw-8-93C-400M  
May 16 2016  
SOLVENT: cdcl3  
NA = 100

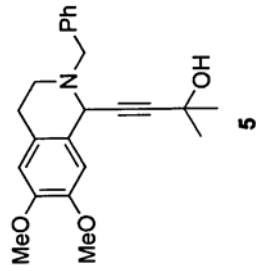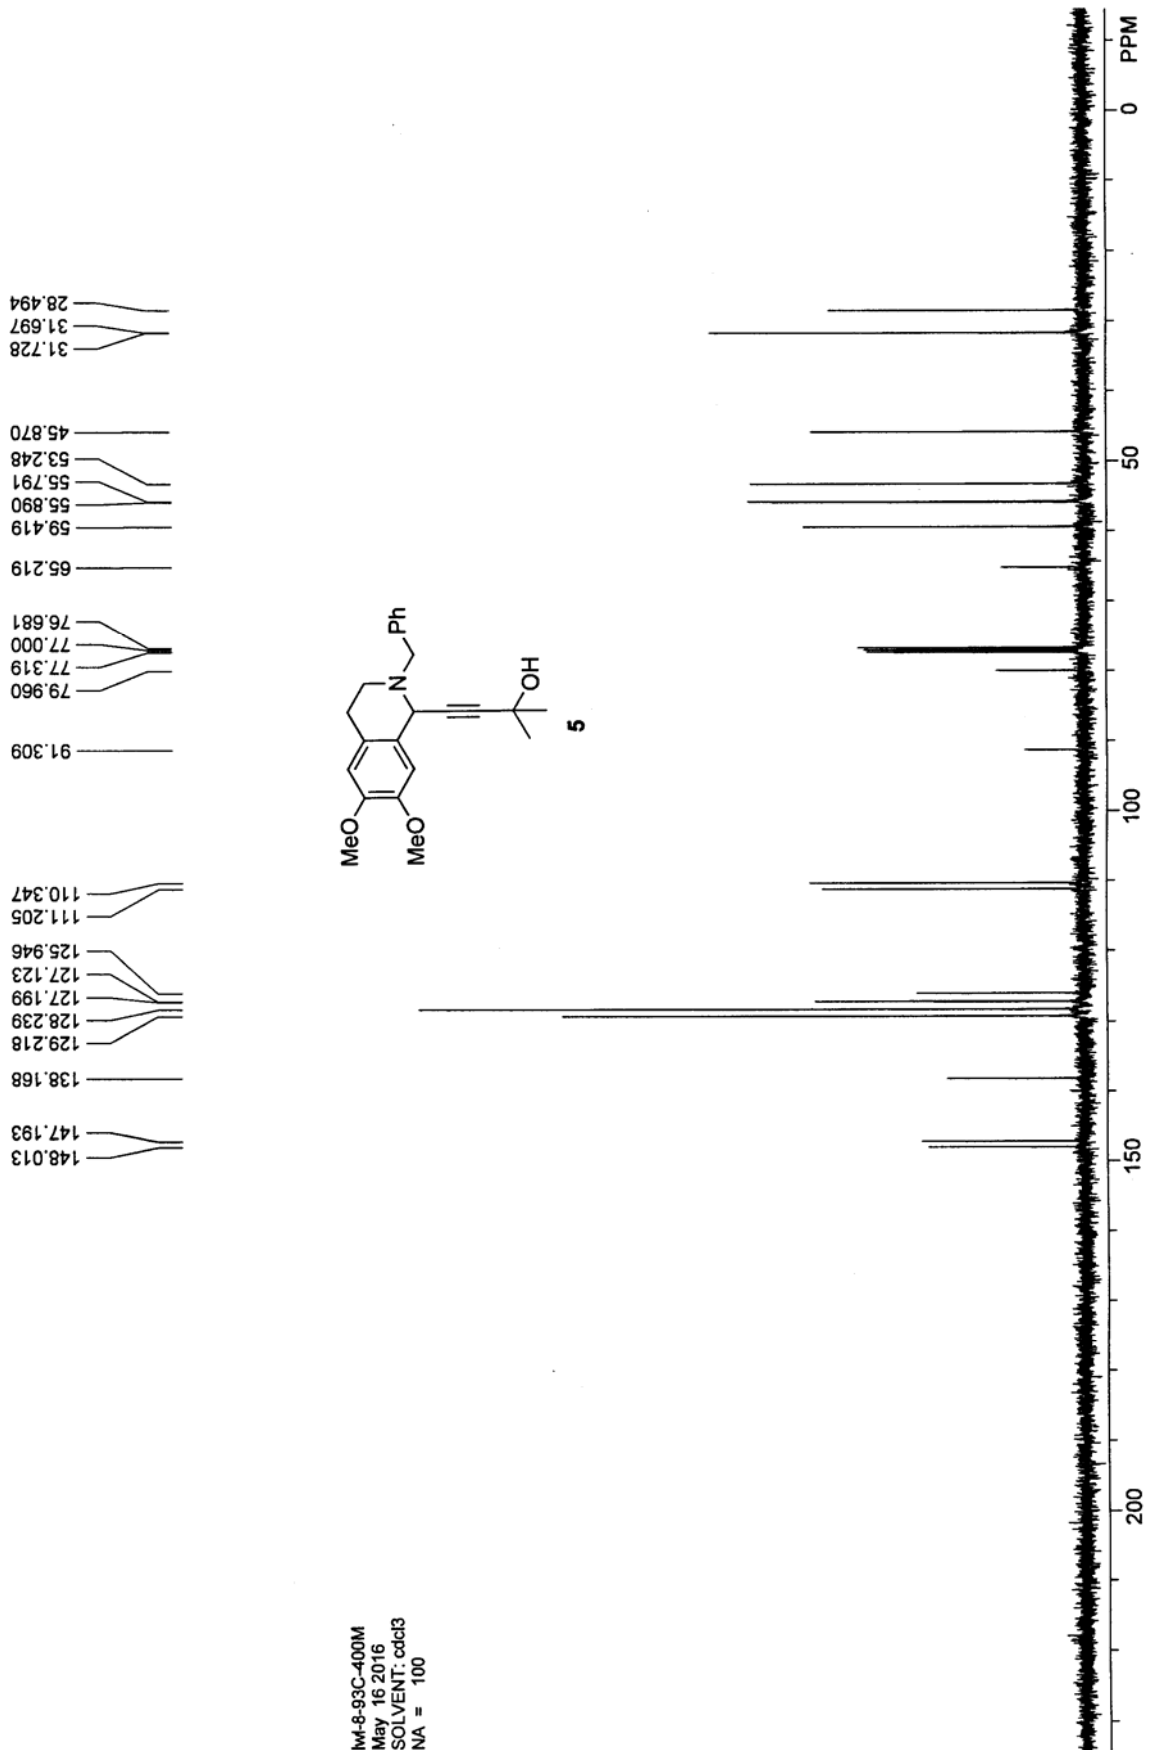

IM-8-94H-400M  
May 16 2016  
SOLVENT: CDCl3  
NA = 8

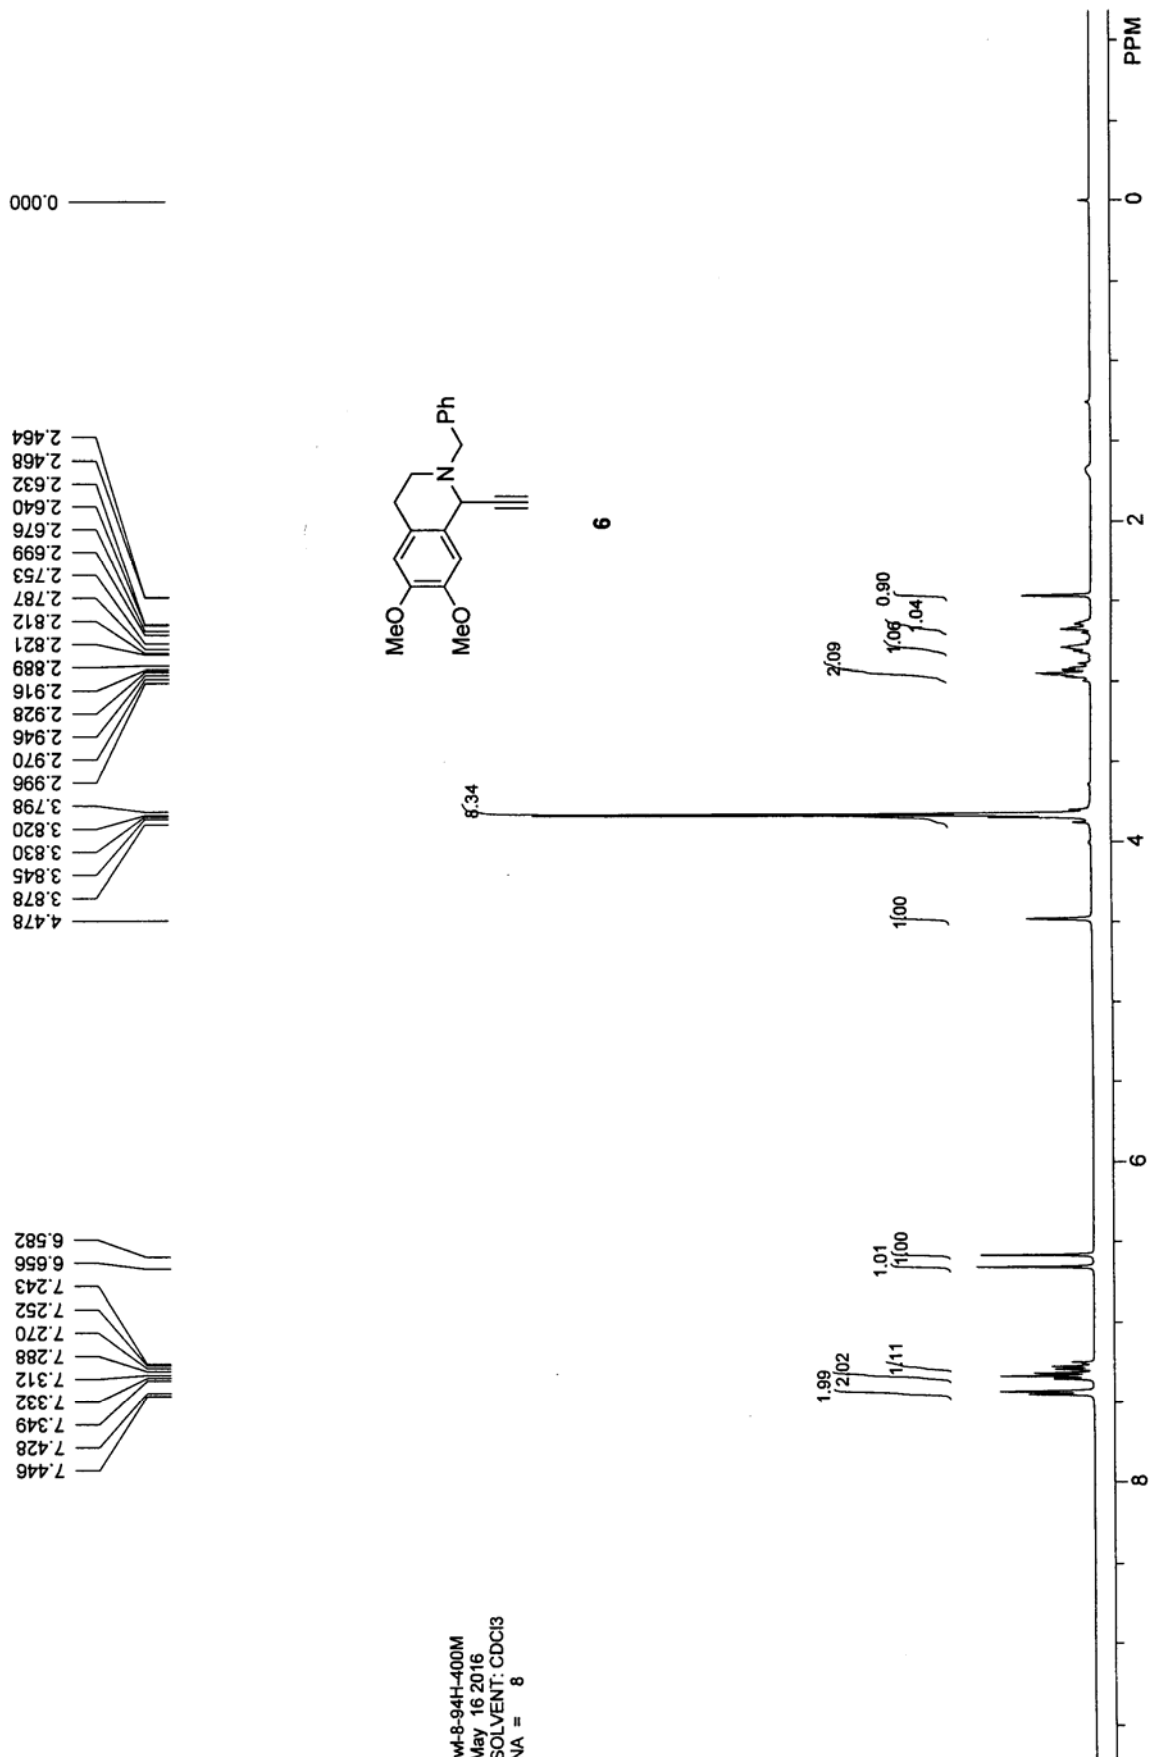

hwf-8-94C-400M  
May 16 2016  
SOLVENT: cdcl3  
NA = 68

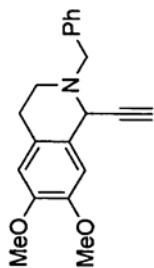

6

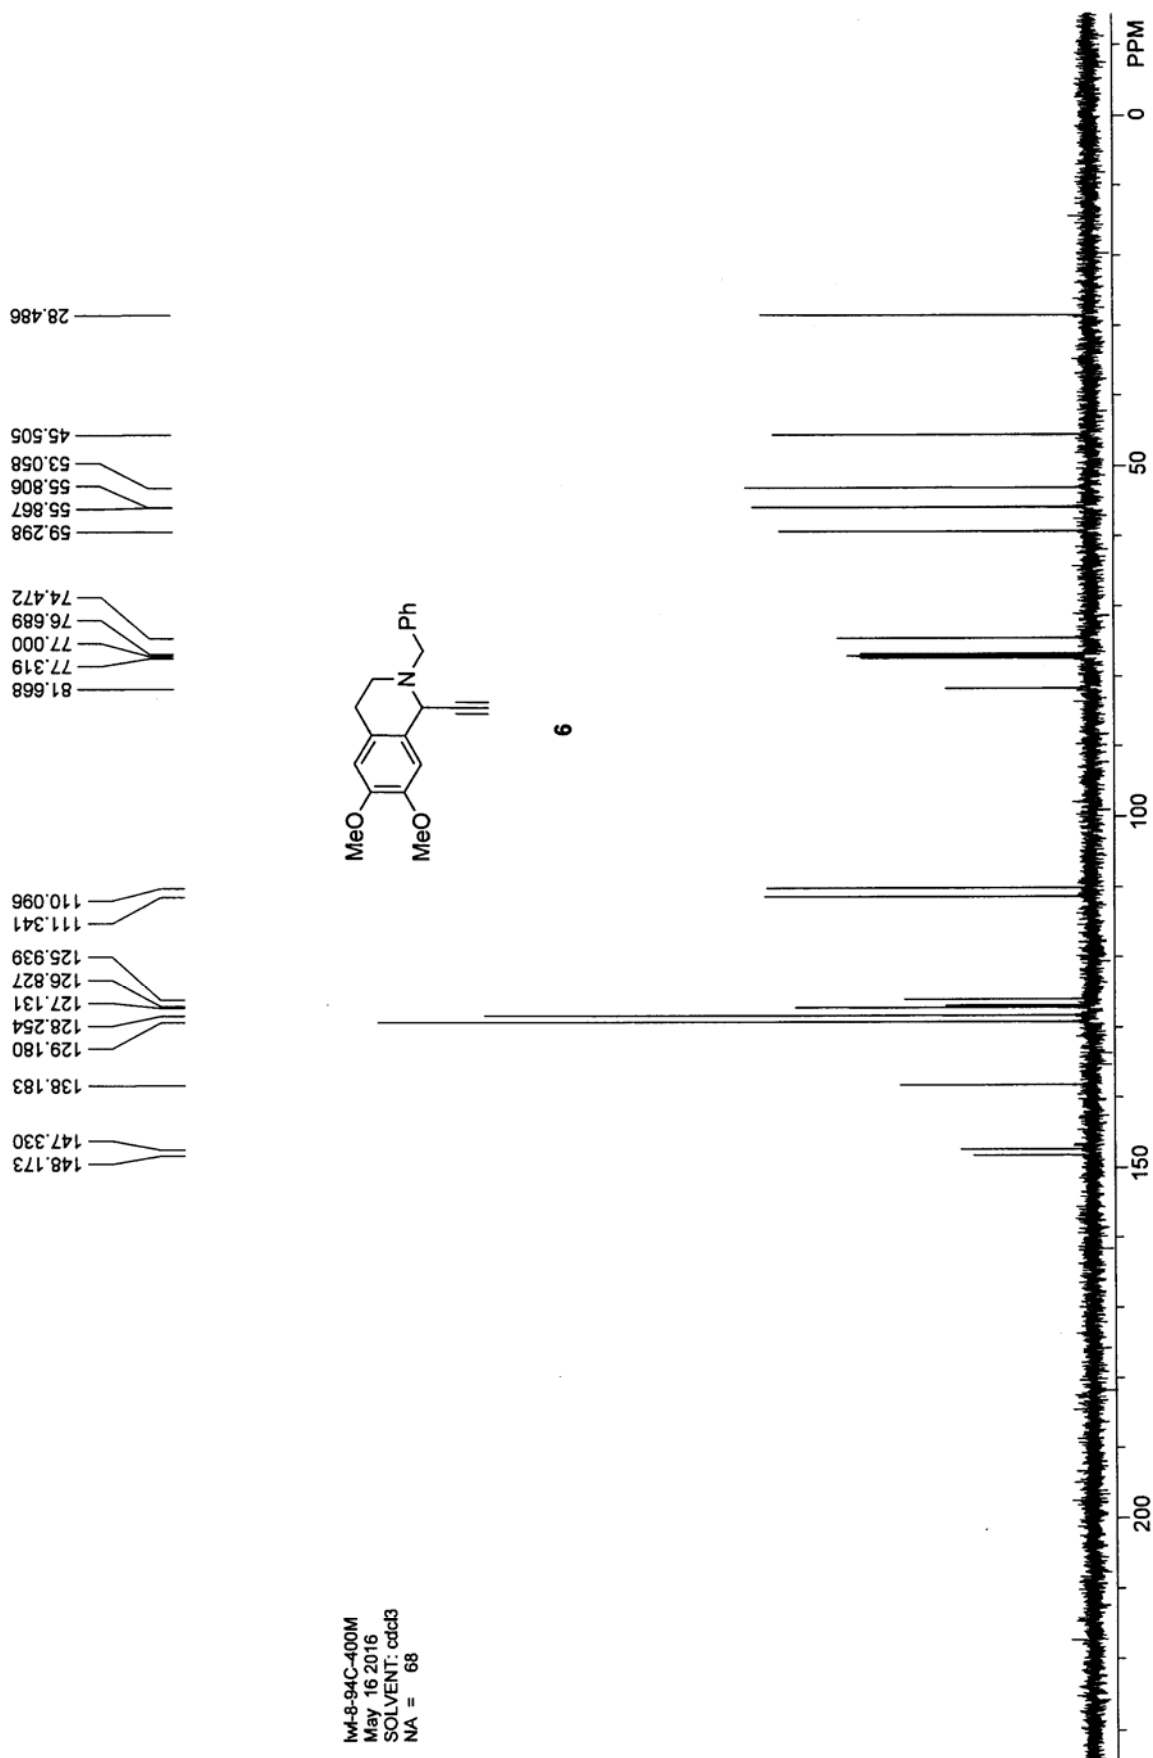

IM-8-95H-400M  
May 17 2016  
SOLVENT: CDCl3  
NA = 4

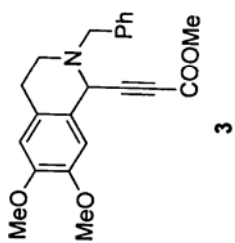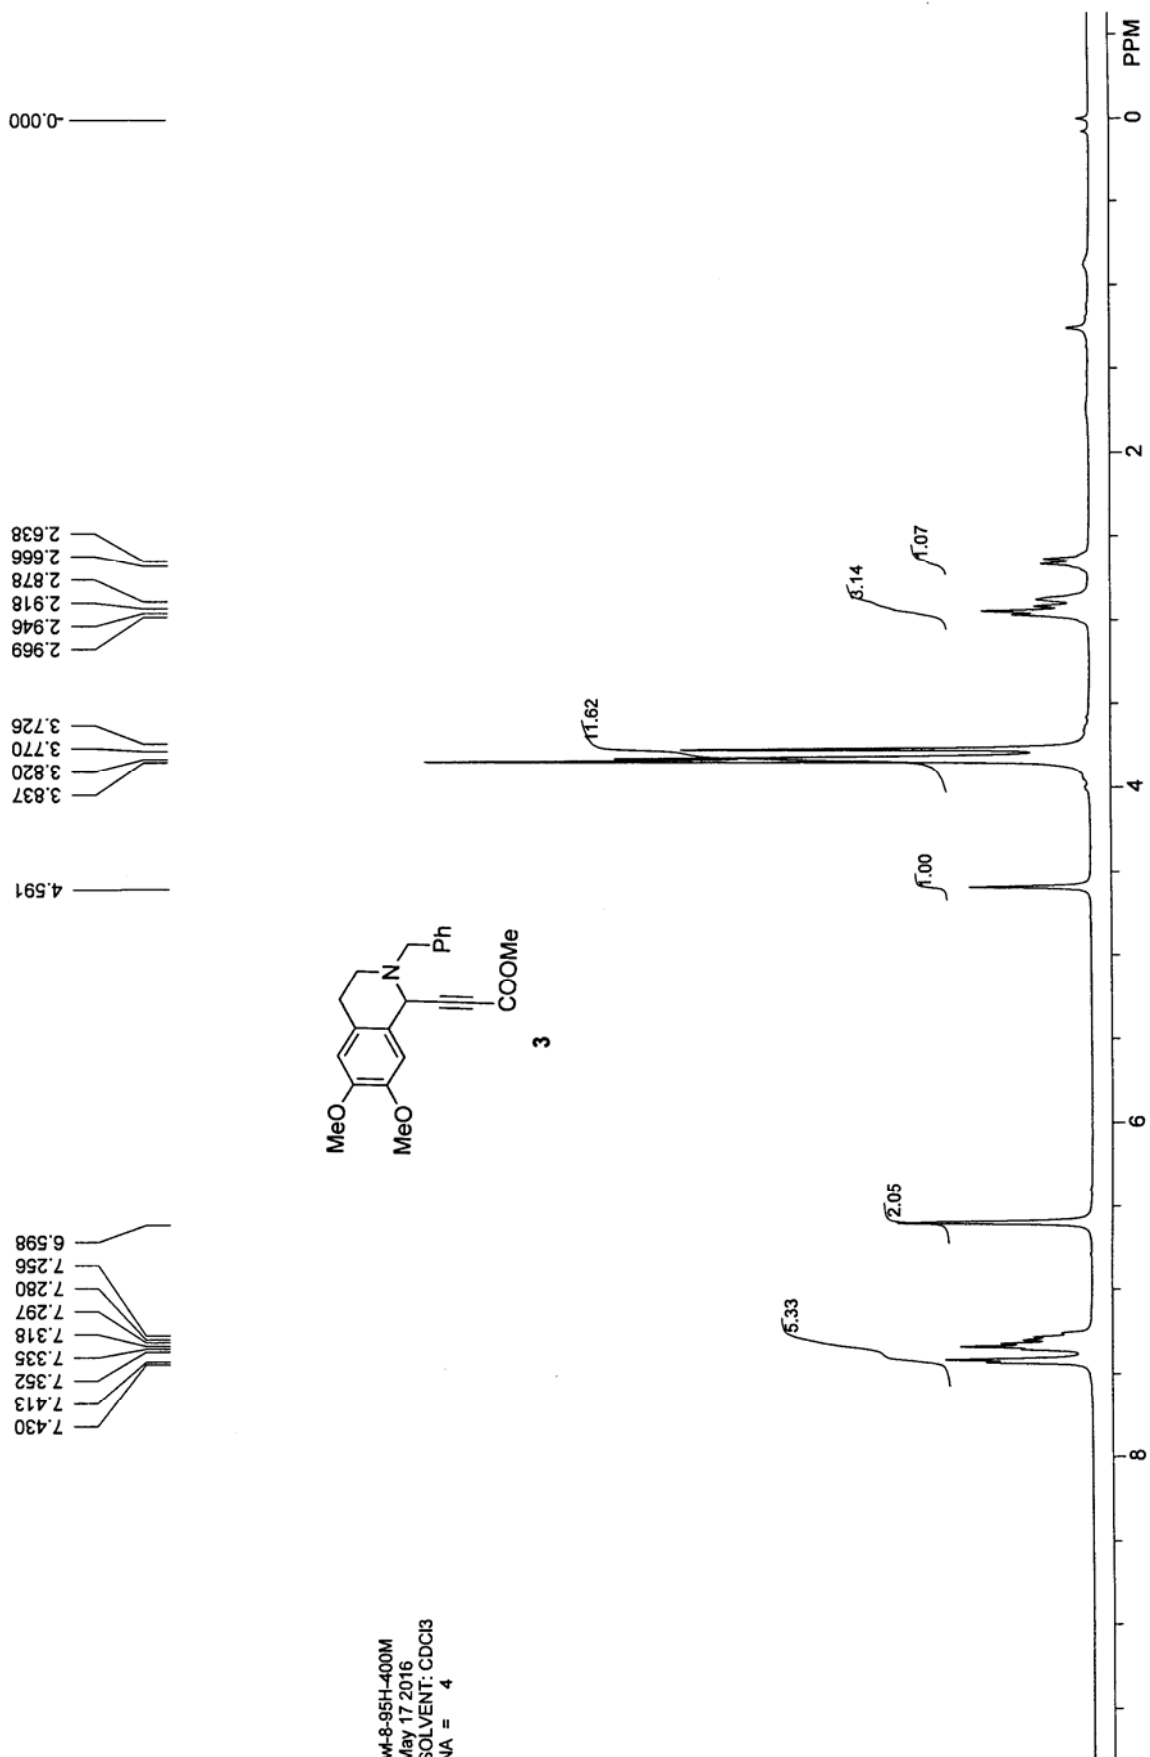



IM-8-95C-400M  
Jan 1 2017  
SOLVENT: cdcl3  
NA = 100

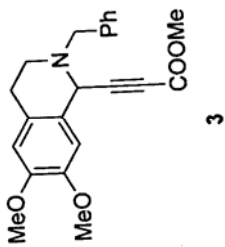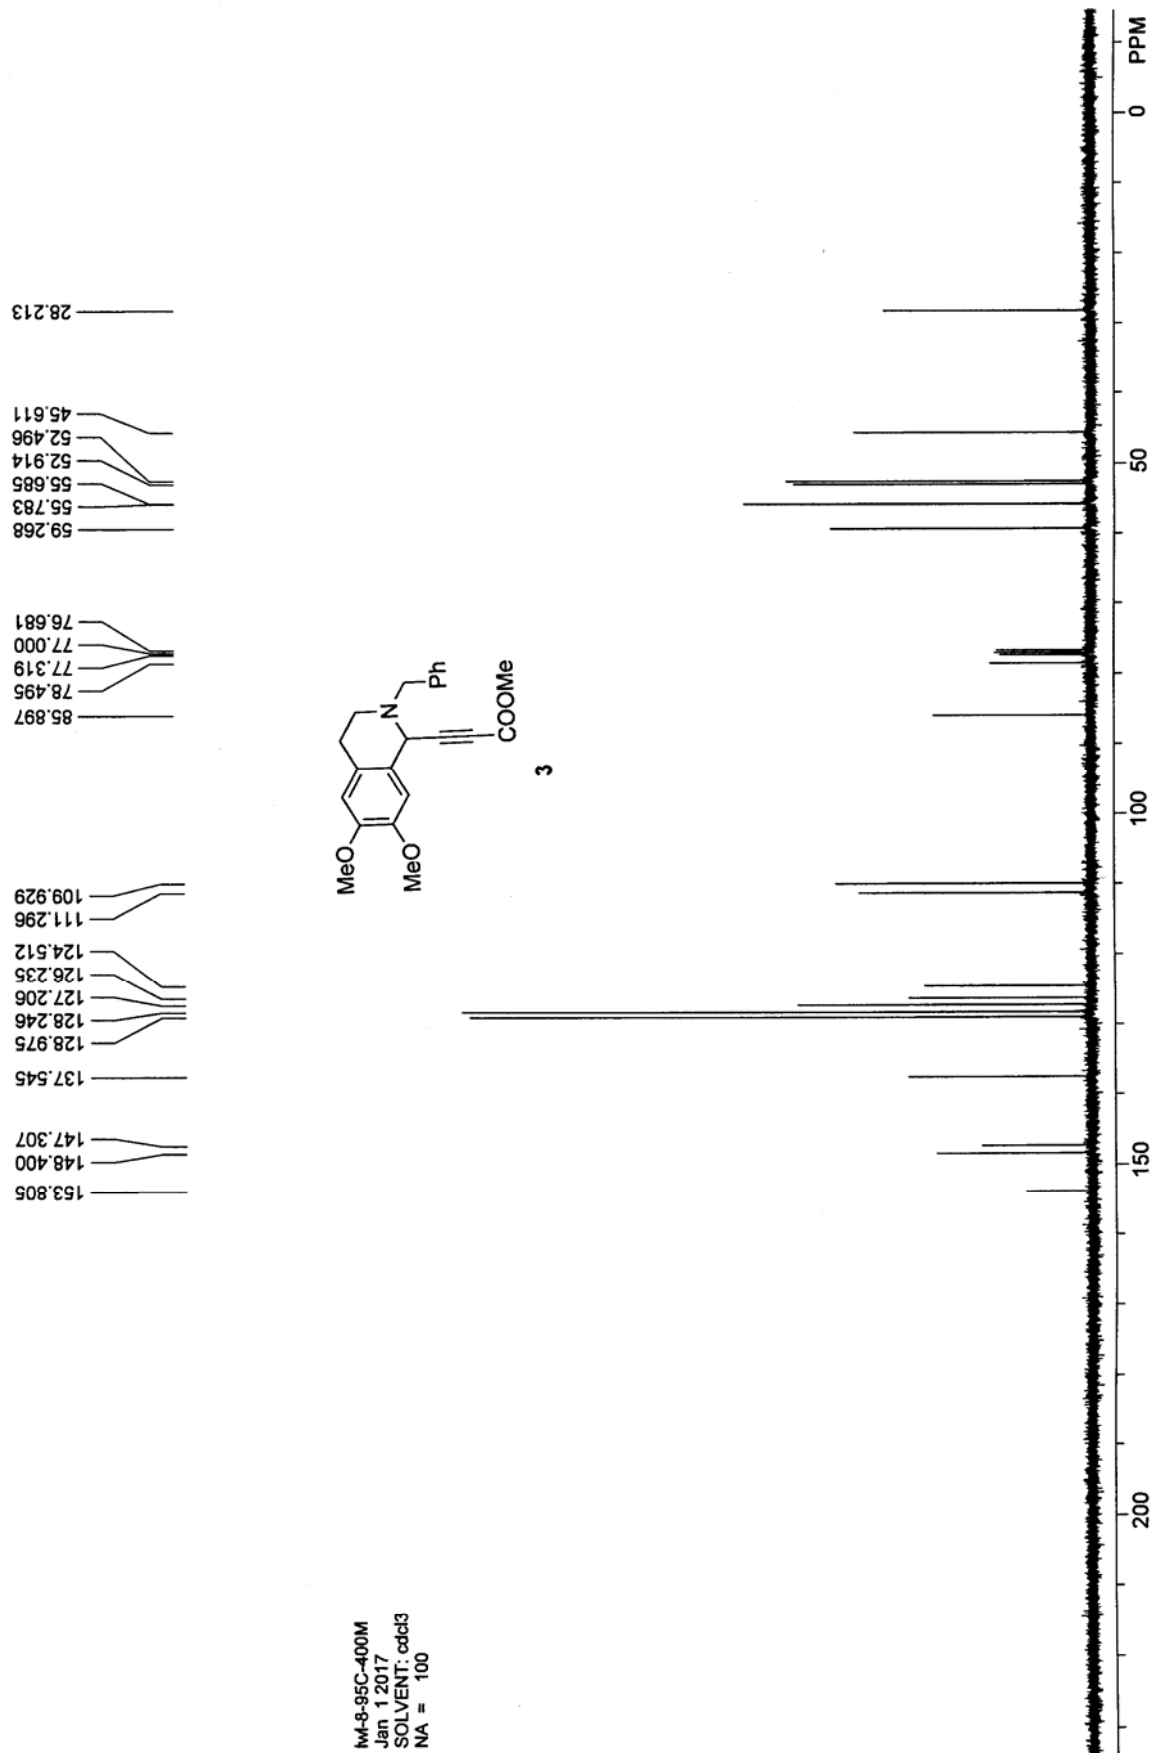

MW-8-103H-400M  
 May 19 2016  
 SOLVENT: CDCl3  
 NA = 8

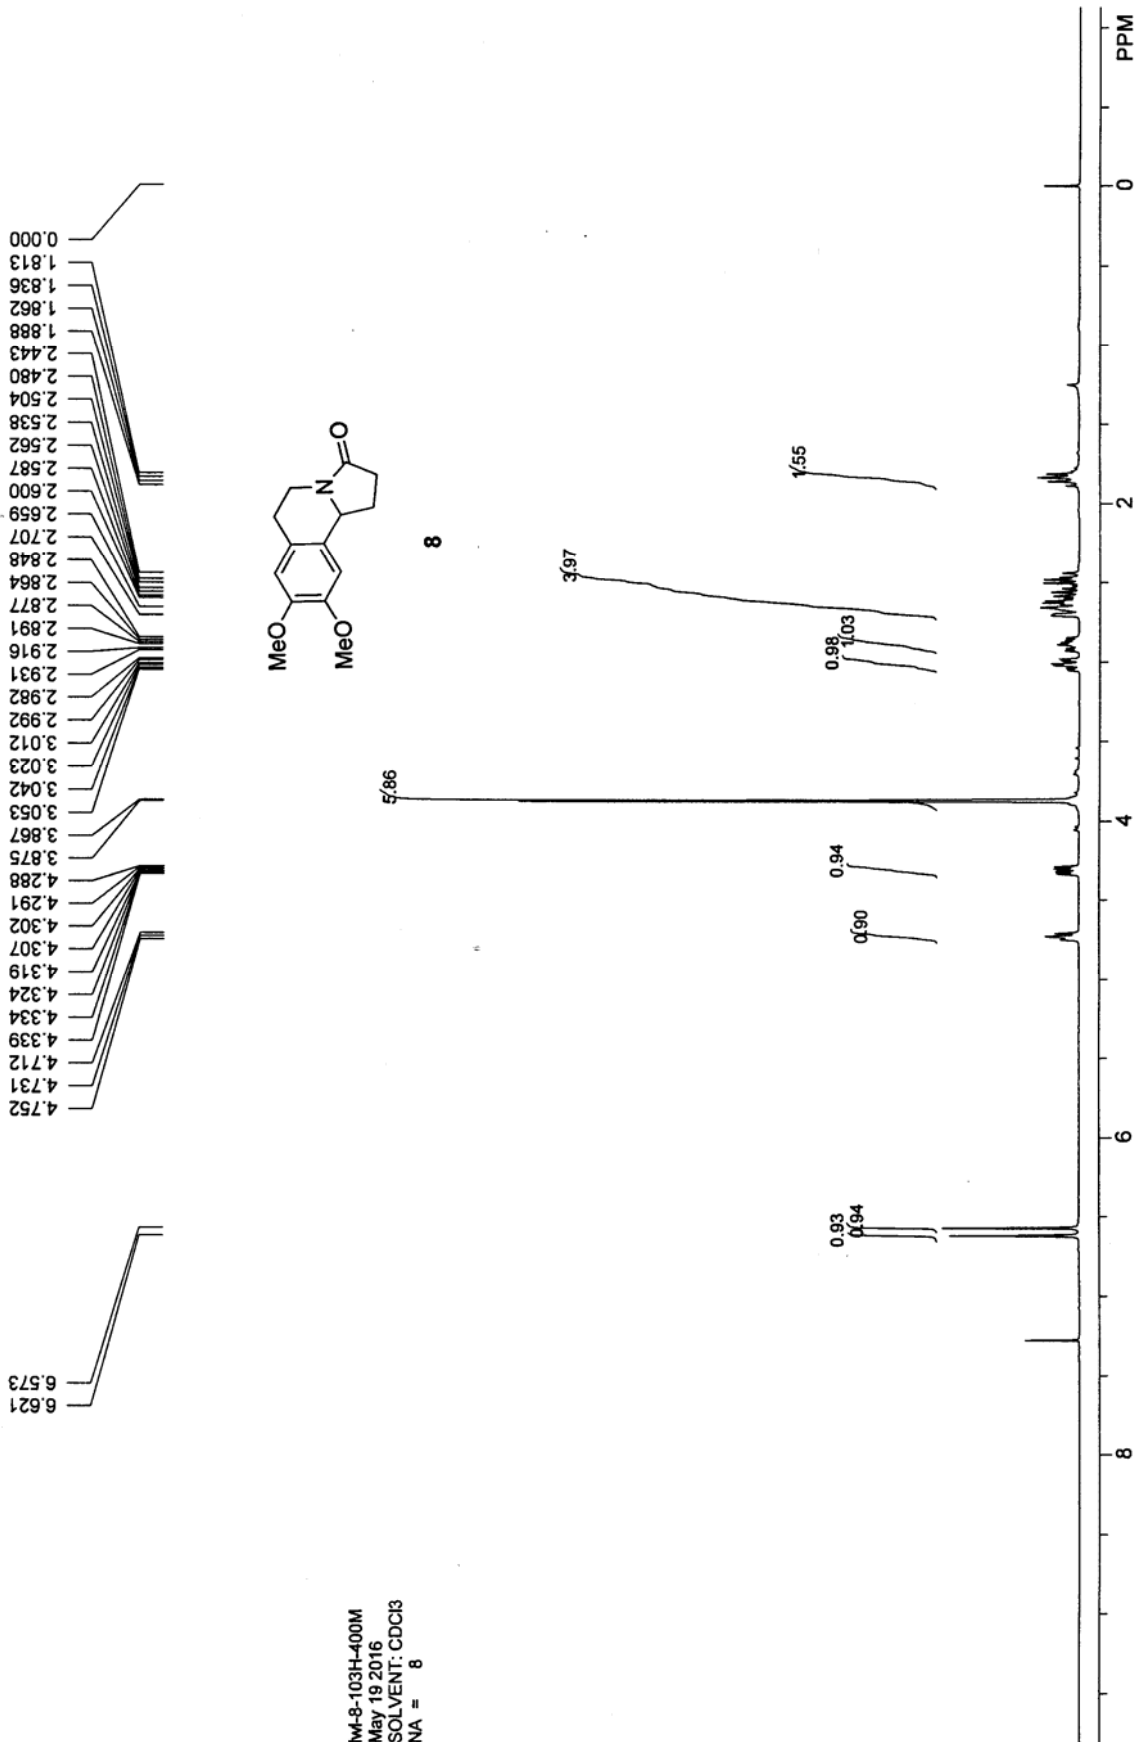

Im-8-103C-400M  
Jan 1 2017  
SOLVENT: cdcl3  
NA = 60

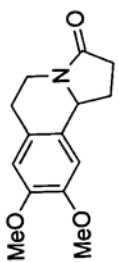

8

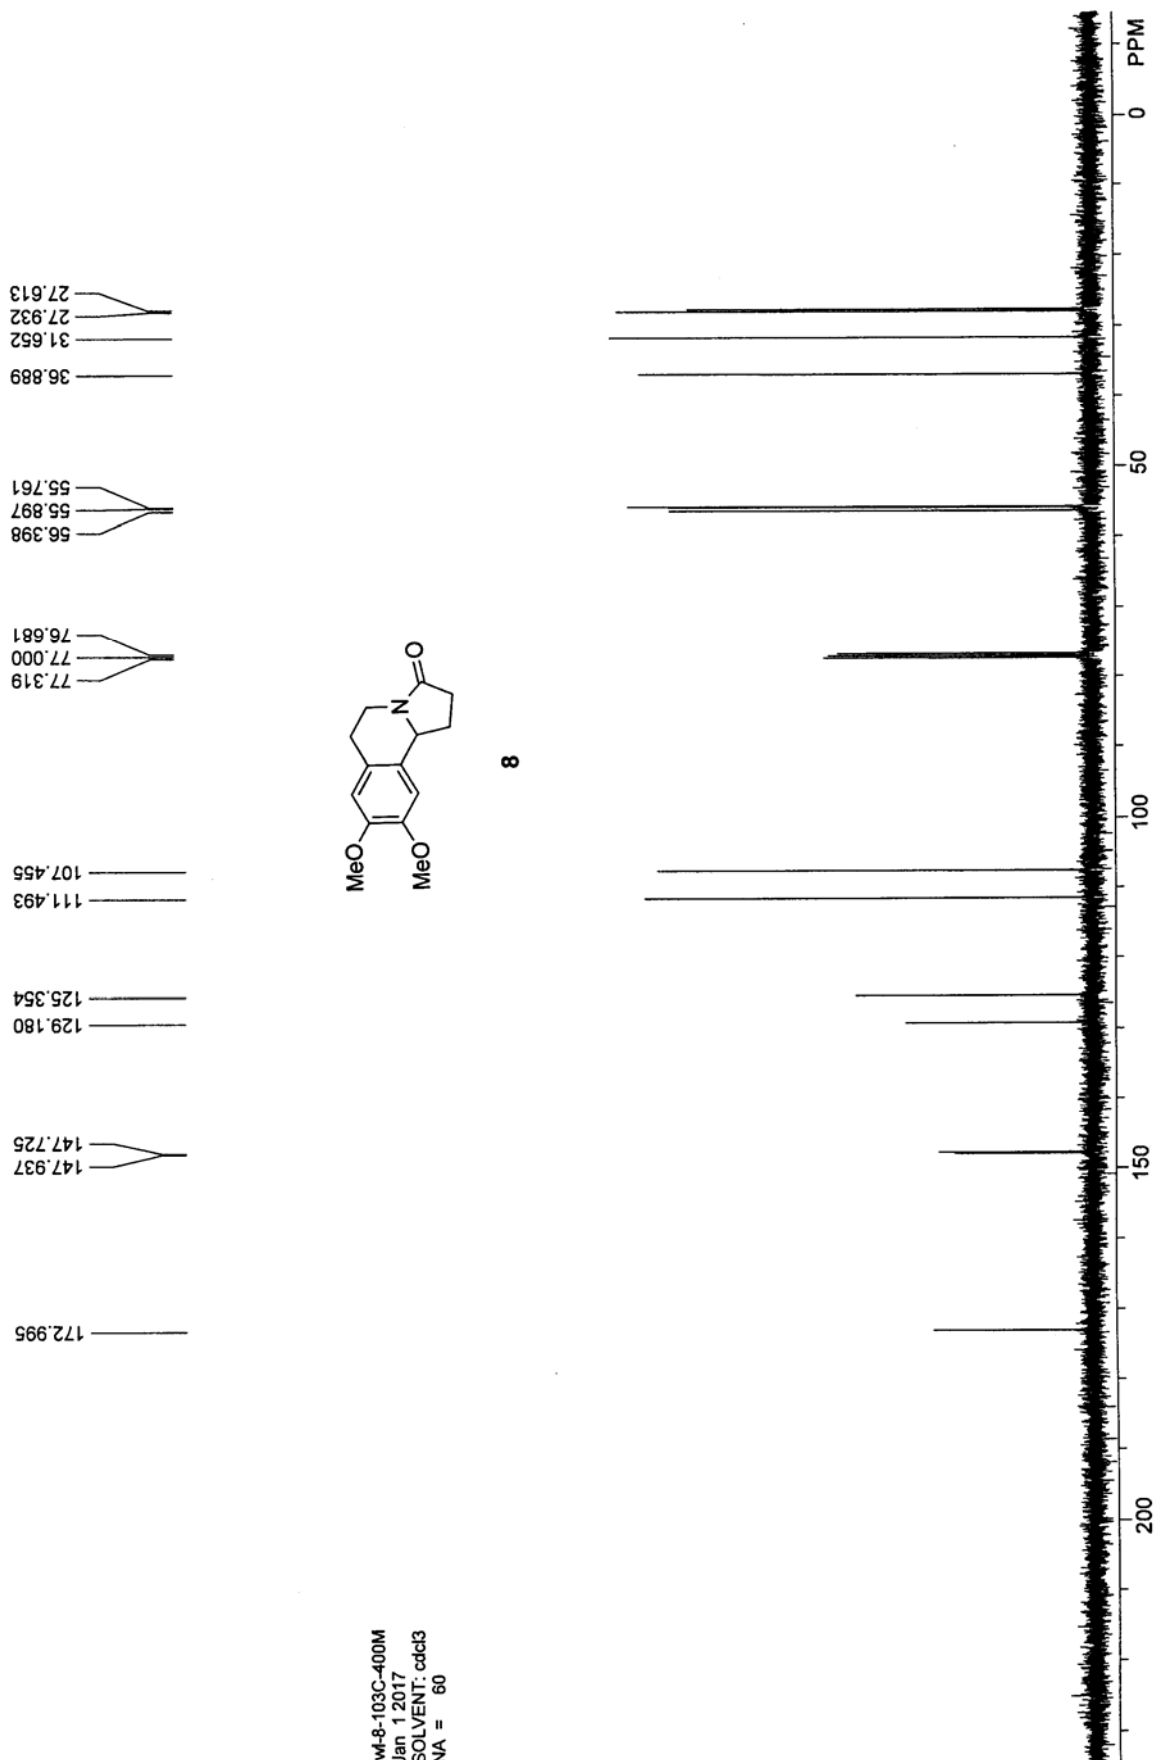

lm-8-165H-400M  
Jan 5 2017  
SOLVENT: dms0  
NA = 16

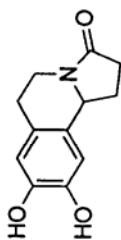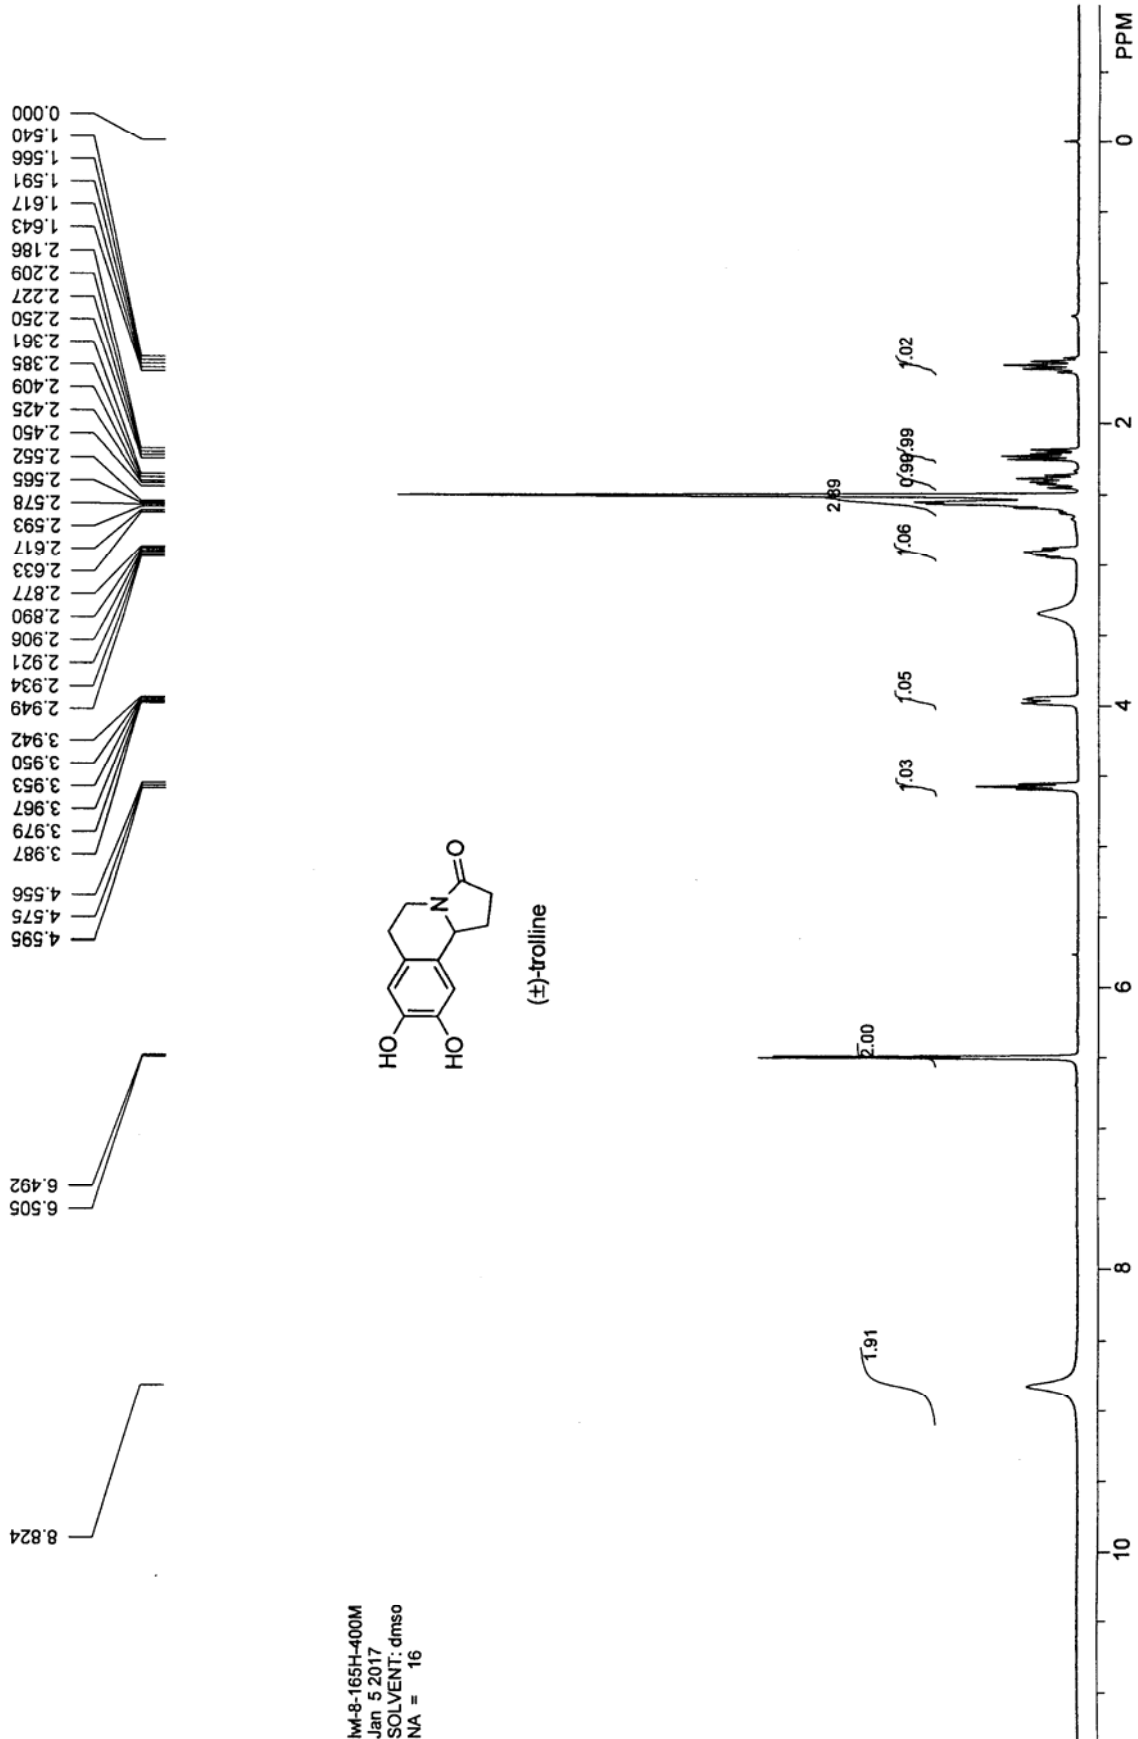

Wf-8-165C-400M  
Jul 1 2016  
SOLVENT: dmso  
NA = 108

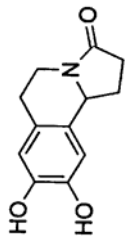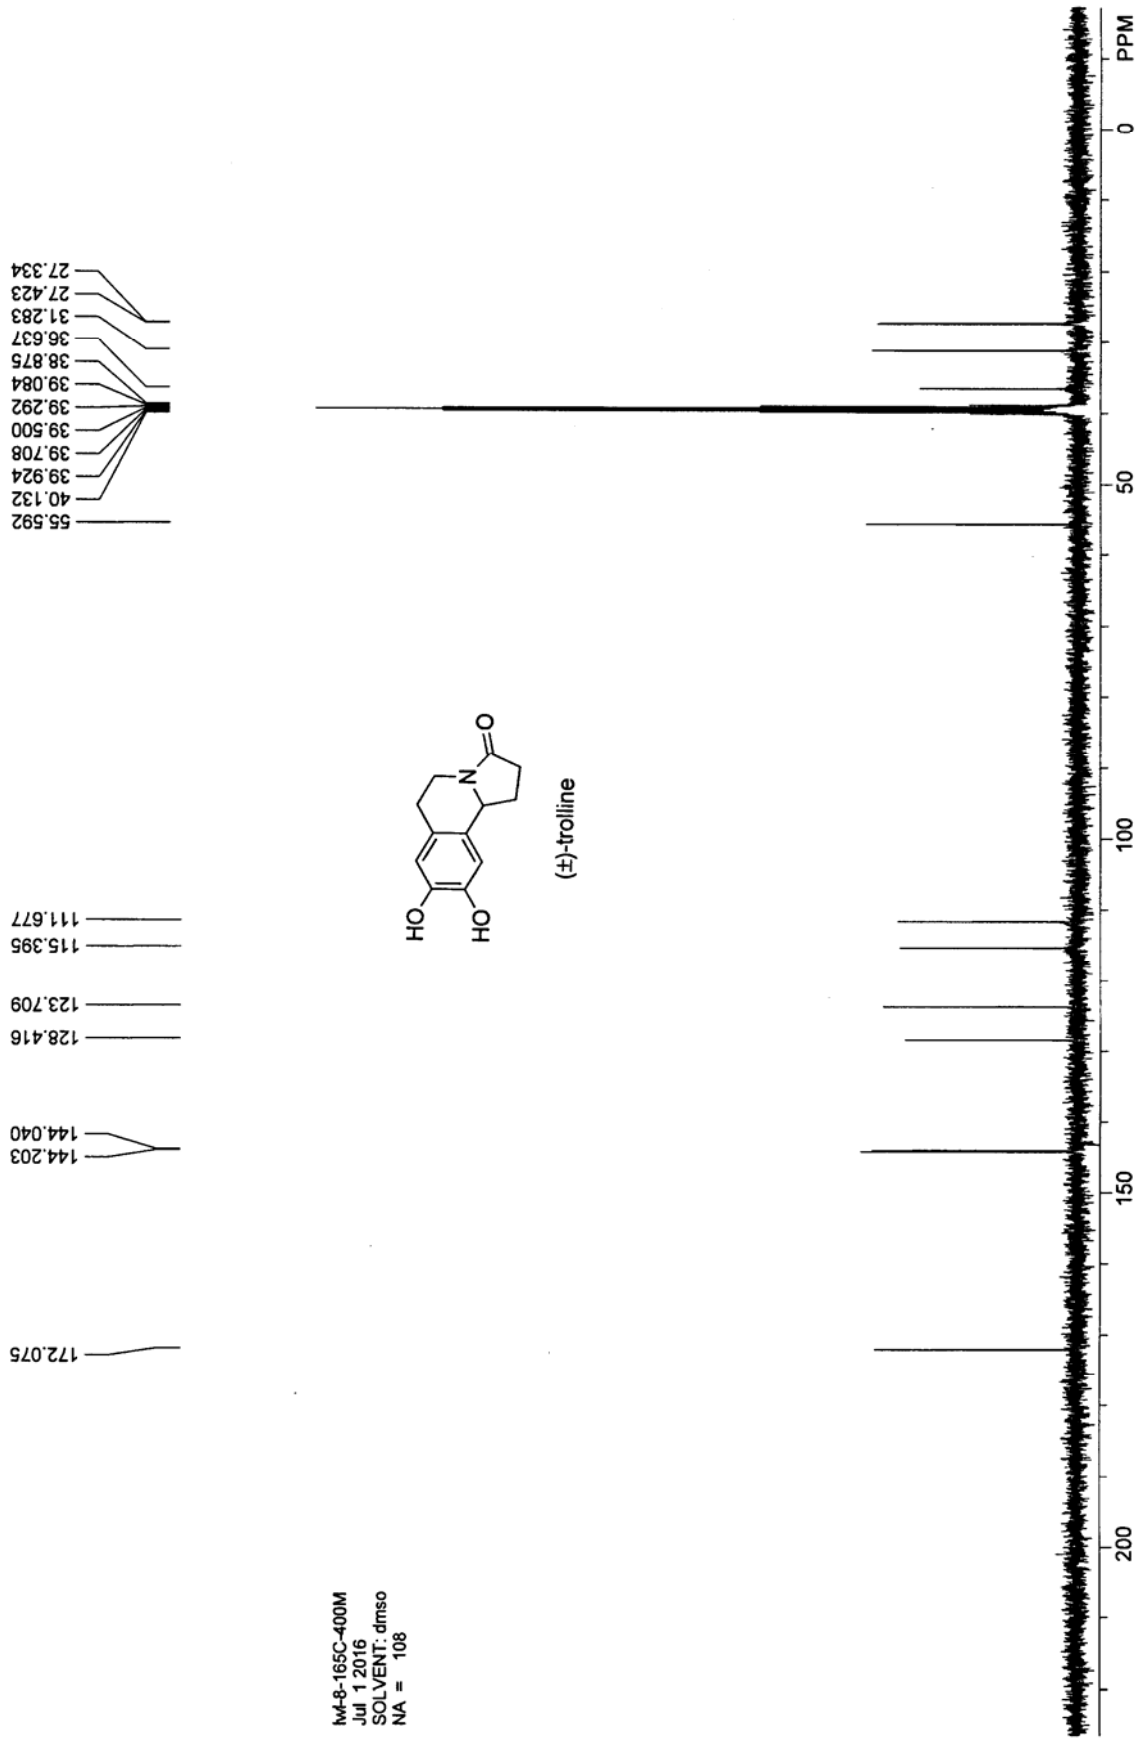

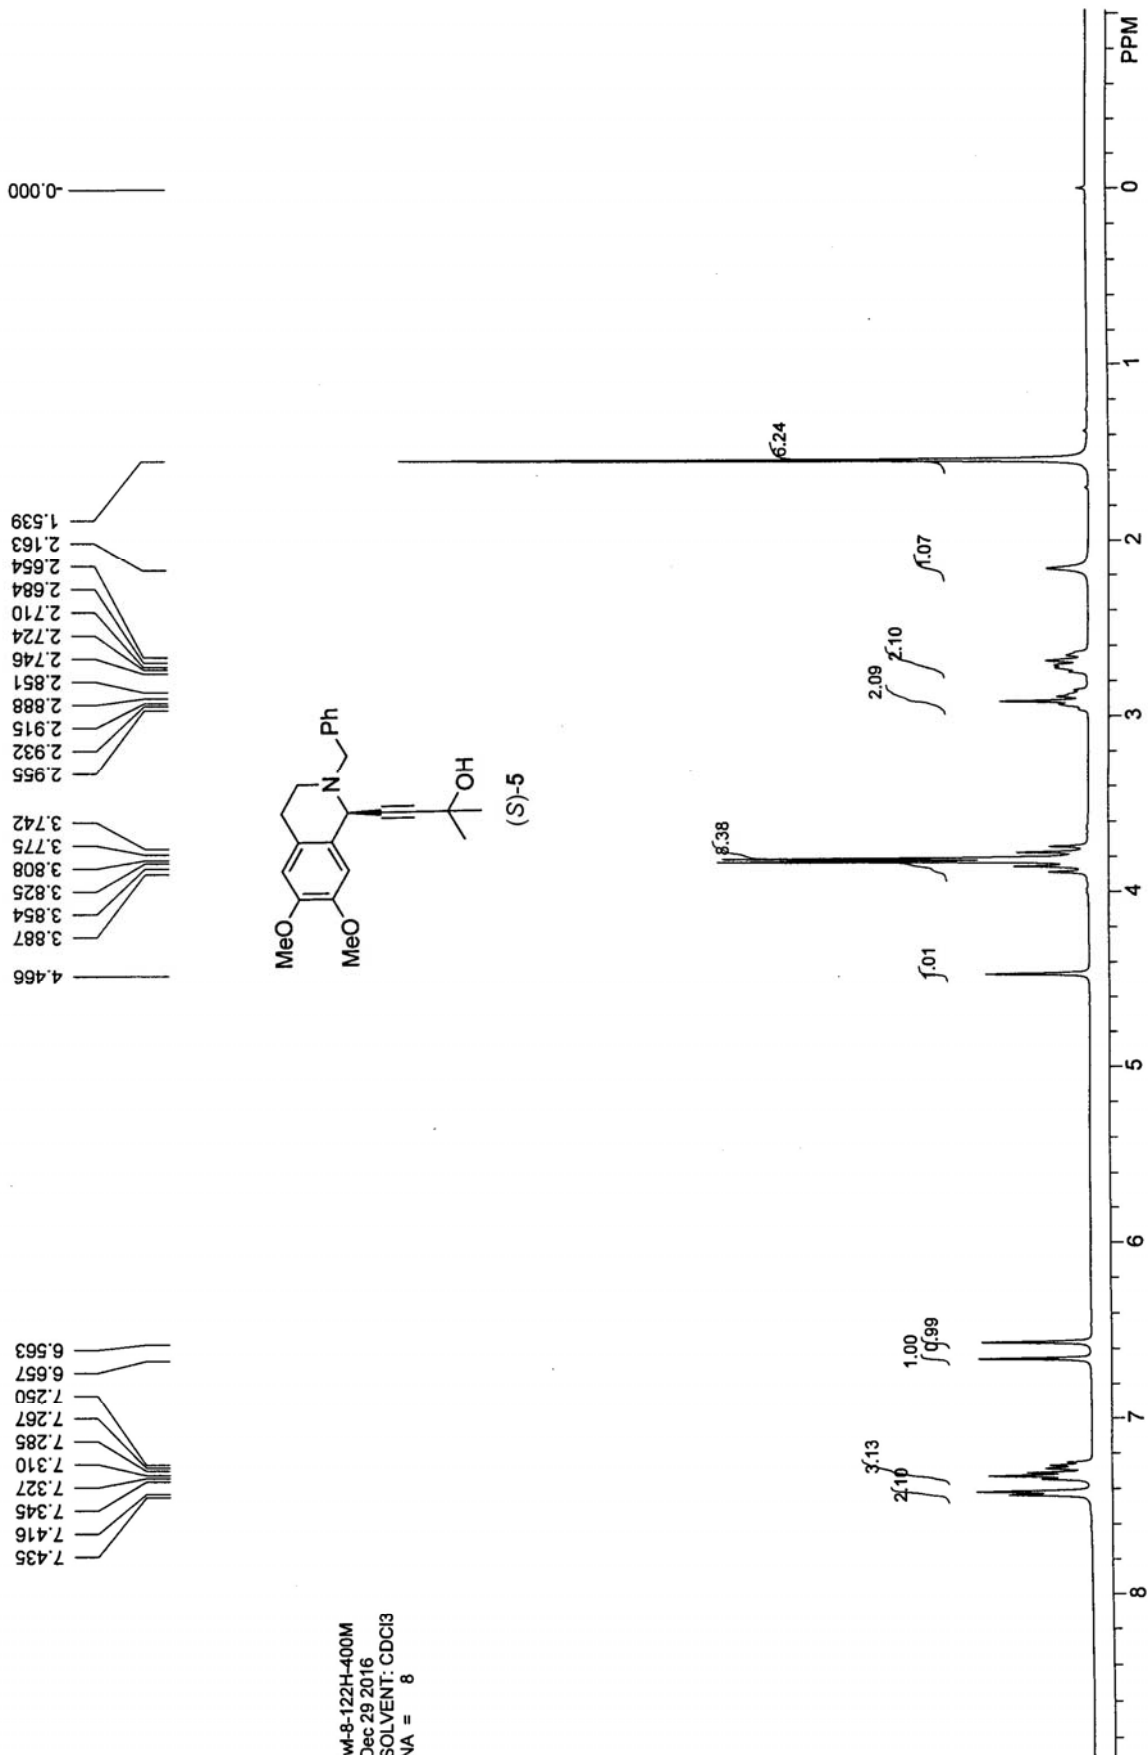

IM-8-122C-400M  
Dec 29 2016  
SOLVENT: cdcl3  
NA = 96

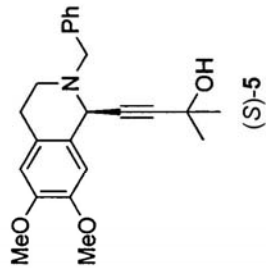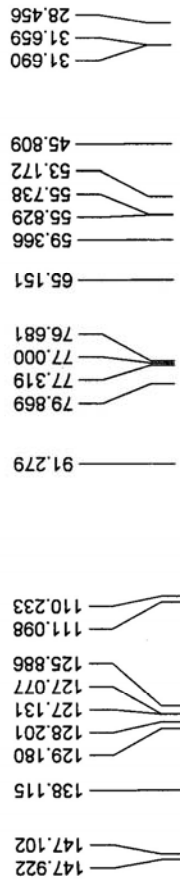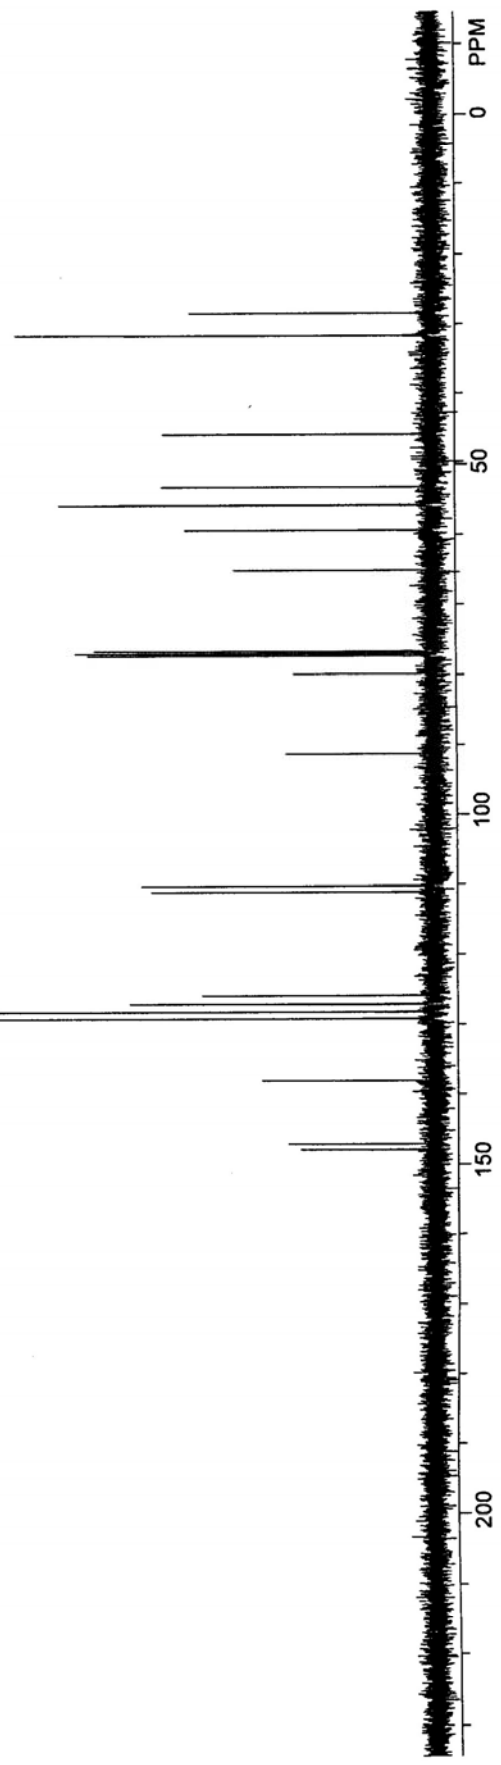

# 1w1-8-122-as-h-80-20-0. 3-214

实验时间: 2016-06-03, 15:59:40

报告时间: 2016-06-03, 16:19:08

谱图文件: F:\zhuguangjiong\lw1\20160603\lw1-8-122-as-h-80-20-0. 3-214. org

实验内容简介:

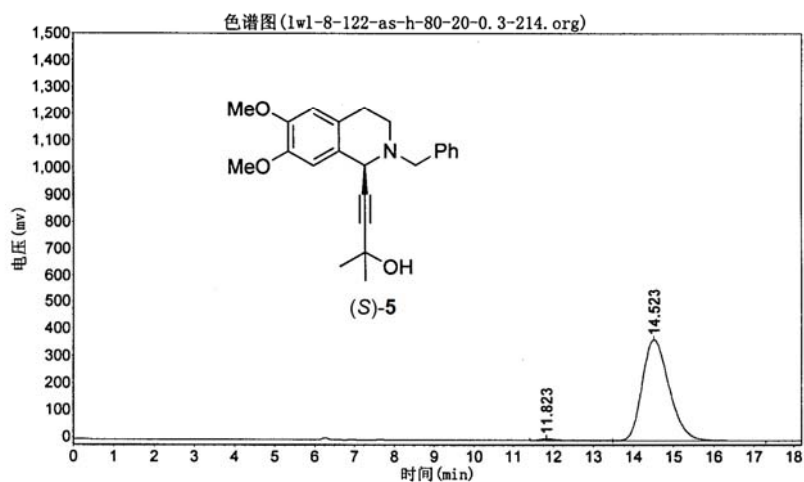

分析结果表

| 峰号 | 峰名 | 保留时间   | 峰高         | 峰面积          | 含量       |
|----|----|--------|------------|--------------|----------|
| 1  |    | 11.823 | 6040.260   | 169833.516   | 0.9635   |
| 2  |    | 14.523 | 373731.906 | 17456912.000 | 99.0365  |
| 总计 |    |        | 379772.167 | 17626745.516 | 100.0000 |



# 1w1-8-79-rac-as-h-80-20-0.3-214

实验时间: 2016-06-03, 16:17:06

报告时间: 2016-06-03, 16:17:49

谱图文件: F:\zhuguangjiong\lwl\20160603\1w1-8-79-rac-as-h-80-20-0.3-214.org

实验内容简介:

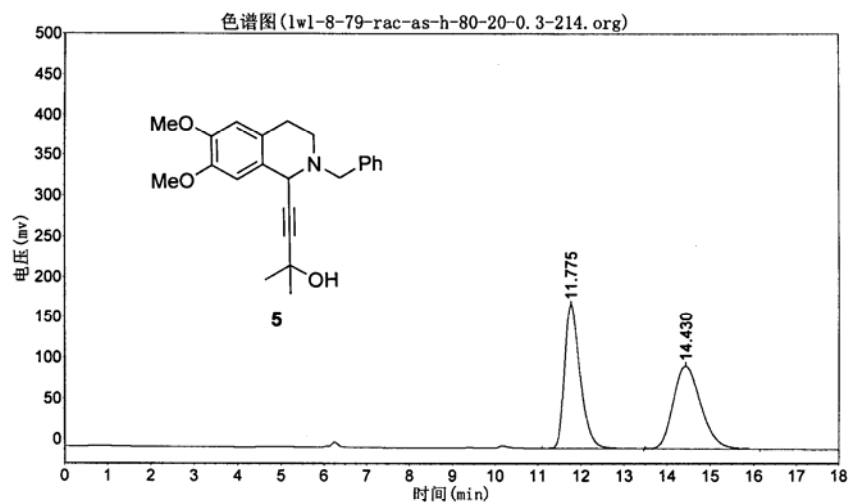

分析结果表

| 峰号 | 峰名 | 保留时间   | 峰高         | 峰面积         | 含量       |
|----|----|--------|------------|-------------|----------|
| 1  |    | 11.775 | 177004.641 | 4485496.000 | 49.7951  |
| 2  |    | 14.430 | 101817.898 | 4522414.500 | 50.2049  |
| 总计 |    |        | 278822.539 | 9007910.500 | 100.0000 |

hw-8-126H-400M  
Dec 29 2016  
SOLVENT: CDCl3  
NA = 8

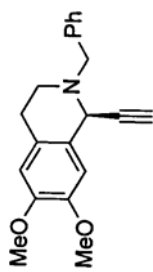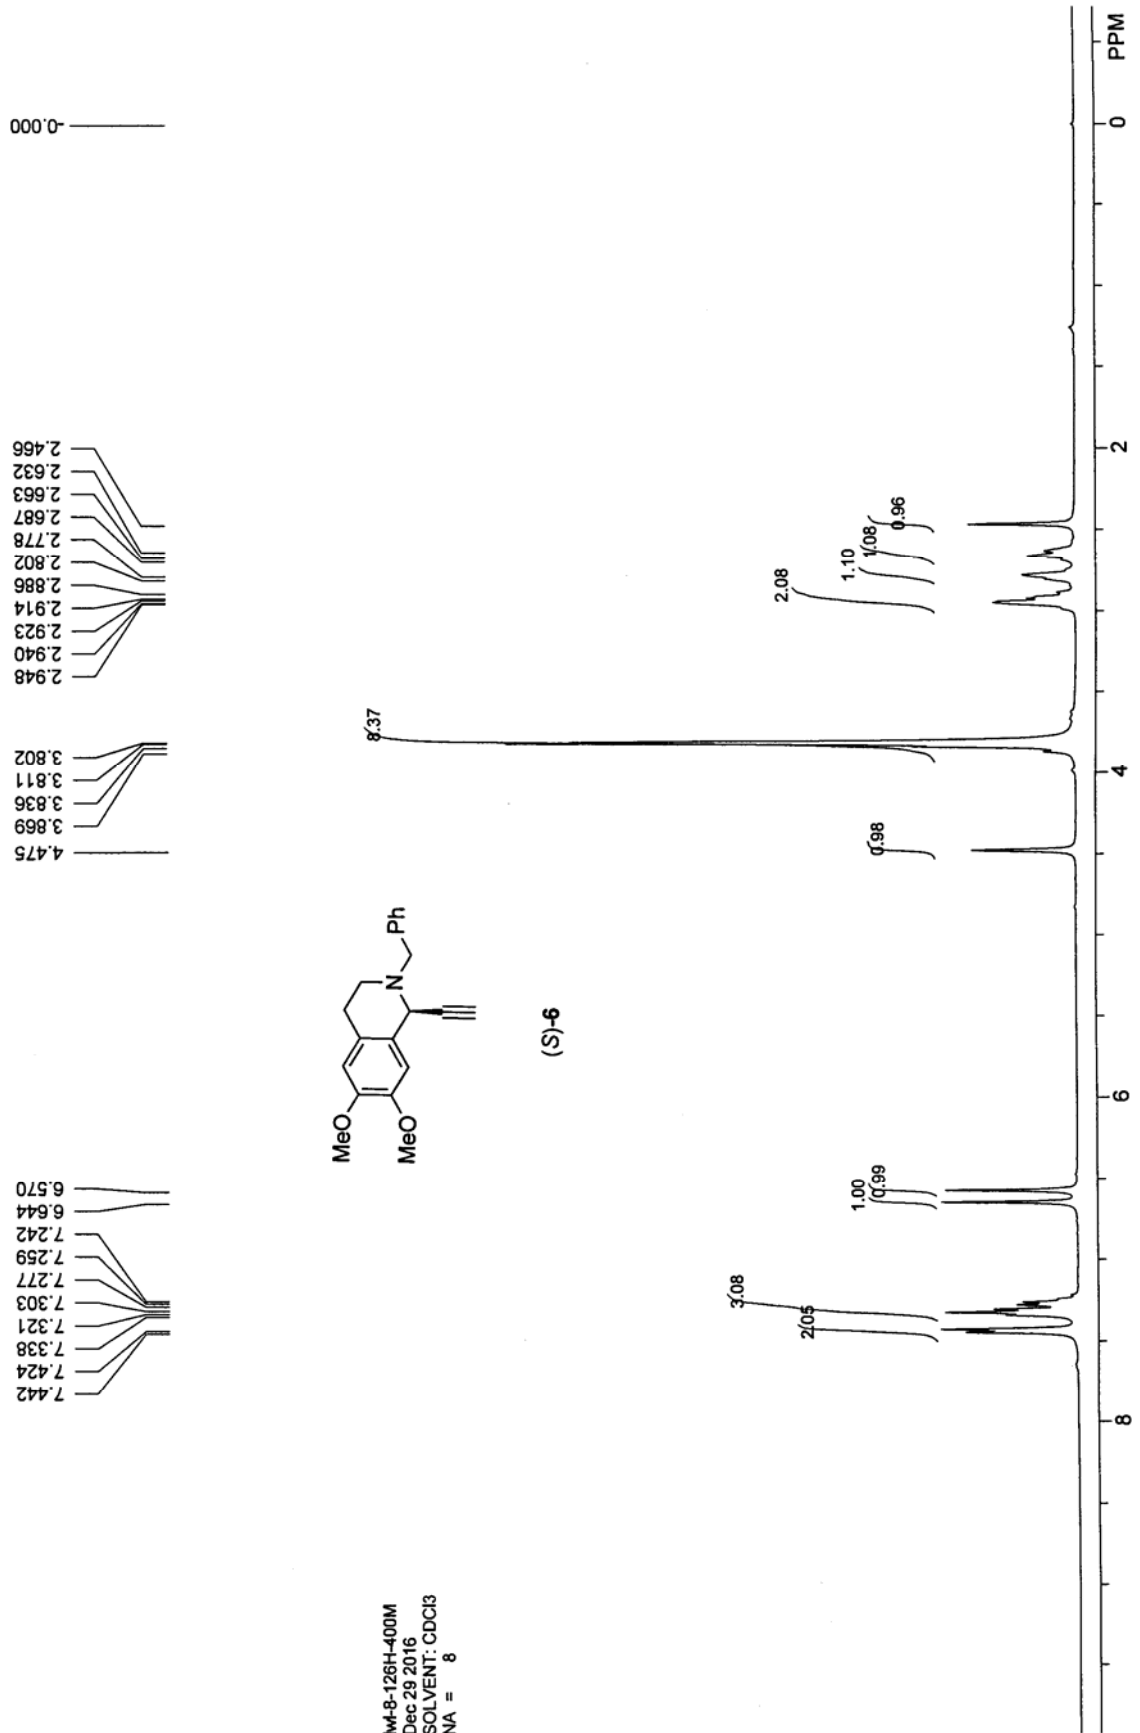

Im-8-126C-400M  
Dec 29 2016  
SOLVENT: cdcl3  
NA = 60

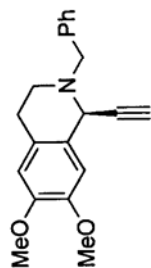

(S)-6

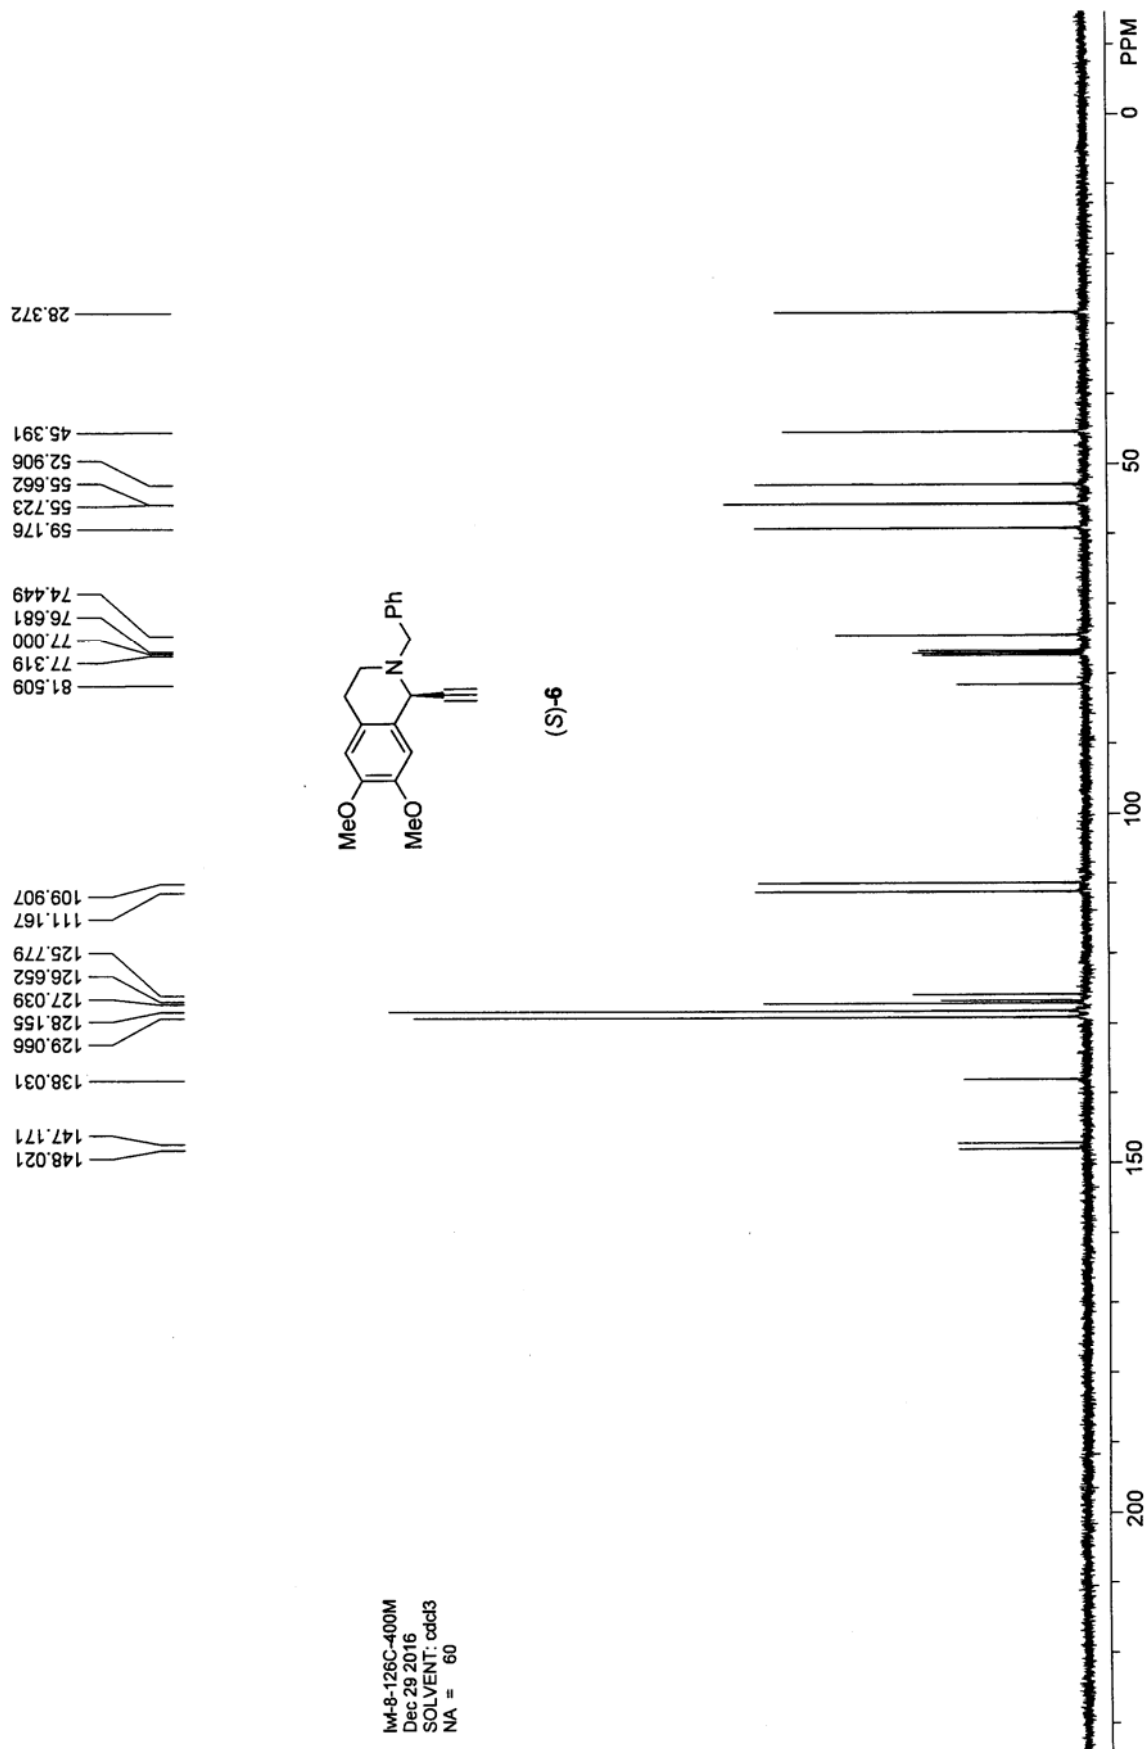

| SAMPLE INFORMATION |                           |                  |                       |
|--------------------|---------------------------|------------------|-----------------------|
| Sample Name:       | MI-8-126-as-h-95-50.5-214 | Acquired By:     | Breeze                |
| Sample Type:       | 未知                        | Date Acquired:   | 2016/6/7 14:07:37 CST |
| Vial:              | 340                       | Acq. Method:     | zgj95                 |
| Injection#:        | 1                         | Date Processed:  | 2016/6/7 14:59:51 CST |
| Injection Volume:  | 10.00 uL                  | Channel Name:    | VQ489 ChA             |
| Run Time:          | 25.00 Minutes             | Channel Desc.:   | VQ489 ChA.214nm       |
| Column Type:       |                           | Sample Set Name: |                       |

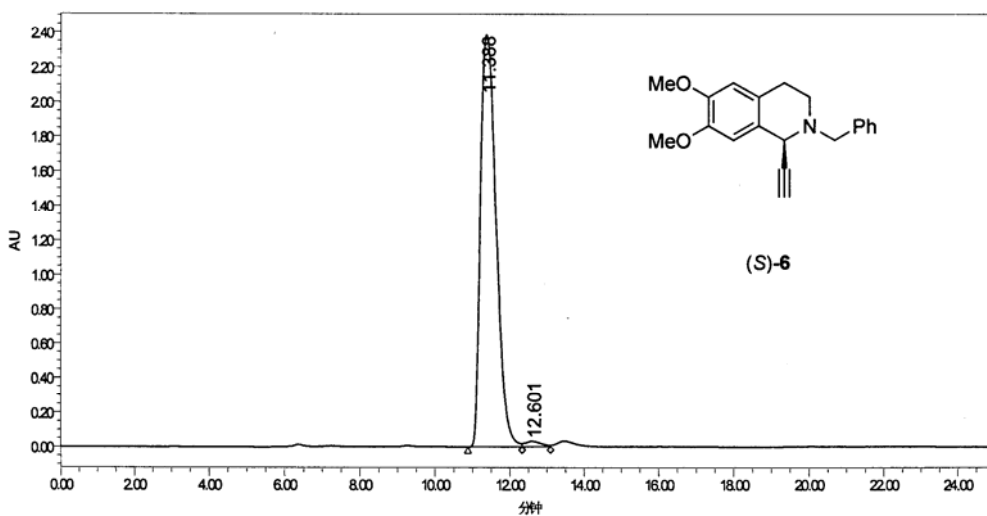

|   | RT<br>(min) | Area<br>(峰面积) | %Area | Hight<br>(峰高) | %<br>Hight |
|---|-------------|---------------|-------|---------------|------------|
| 1 | 11.386      | 66648416      | 98.63 | 2388311       | 98.70      |
| 2 | 12.601      | 966266        | 1.37  | 31542         | 1.30       |

中国科学院上海有机化学研究所

Project Name: defaults for copy

Reported by User: Breeze user (Breeze)

**Breeze 2**  
HPLC System

### SAMPLE INFORMATION

|                   |                          |                  |                       |
|-------------------|--------------------------|------------------|-----------------------|
| Sample Name:      | W-894-rac-as-h9550.5-214 | Acquired By:     | Breeze                |
| Sample Type:      | 未知                       | Date Acquired:   | 2016/6/7 14:40:44 CST |
| Vial:             | 341                      | Acq. Method:     | zgj95                 |
| Injection #:      | 1                        | Date Processed:  | 2016/6/7 15:00:02 CST |
| Injection Volume: | 10.00 $\mu$ l            | Channel Name:    | VQ2489 ChA            |
| Run Time:         | 25.00 Minutes            | Channel Desc.:   | VQ2489 ChA.214mm      |
| Column Type:      |                          | Sample Set Name: |                       |

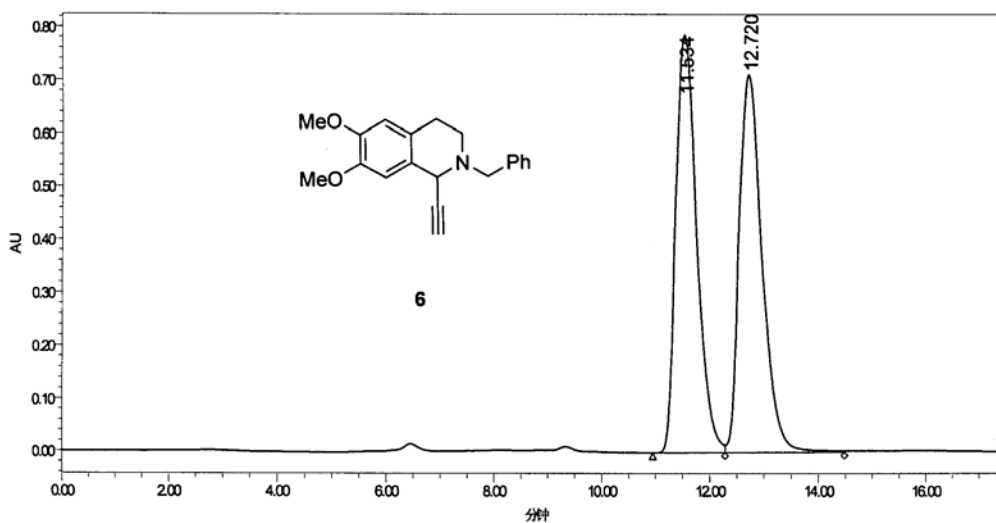

|   | RT<br>(min) | Area<br>(峰面积) | %Area | Height<br>(峰高) | %<br>Height |
|---|-------------|---------------|-------|----------------|-------------|
| 1 | 11.534      | 21288541      | 50.26 | 788188         | 52.47       |
| 2 | 12.720      | 21071285      | 49.74 | 714016         | 47.53       |

Report Method: Individual Report ASC

Page: 1 (共计 1)

Printed: 2016/6/7

16:02:25 PRC

HW-8-127H-400M.  
Jan 1 2017  
SOLVENT: CDCl3  
NA = 8

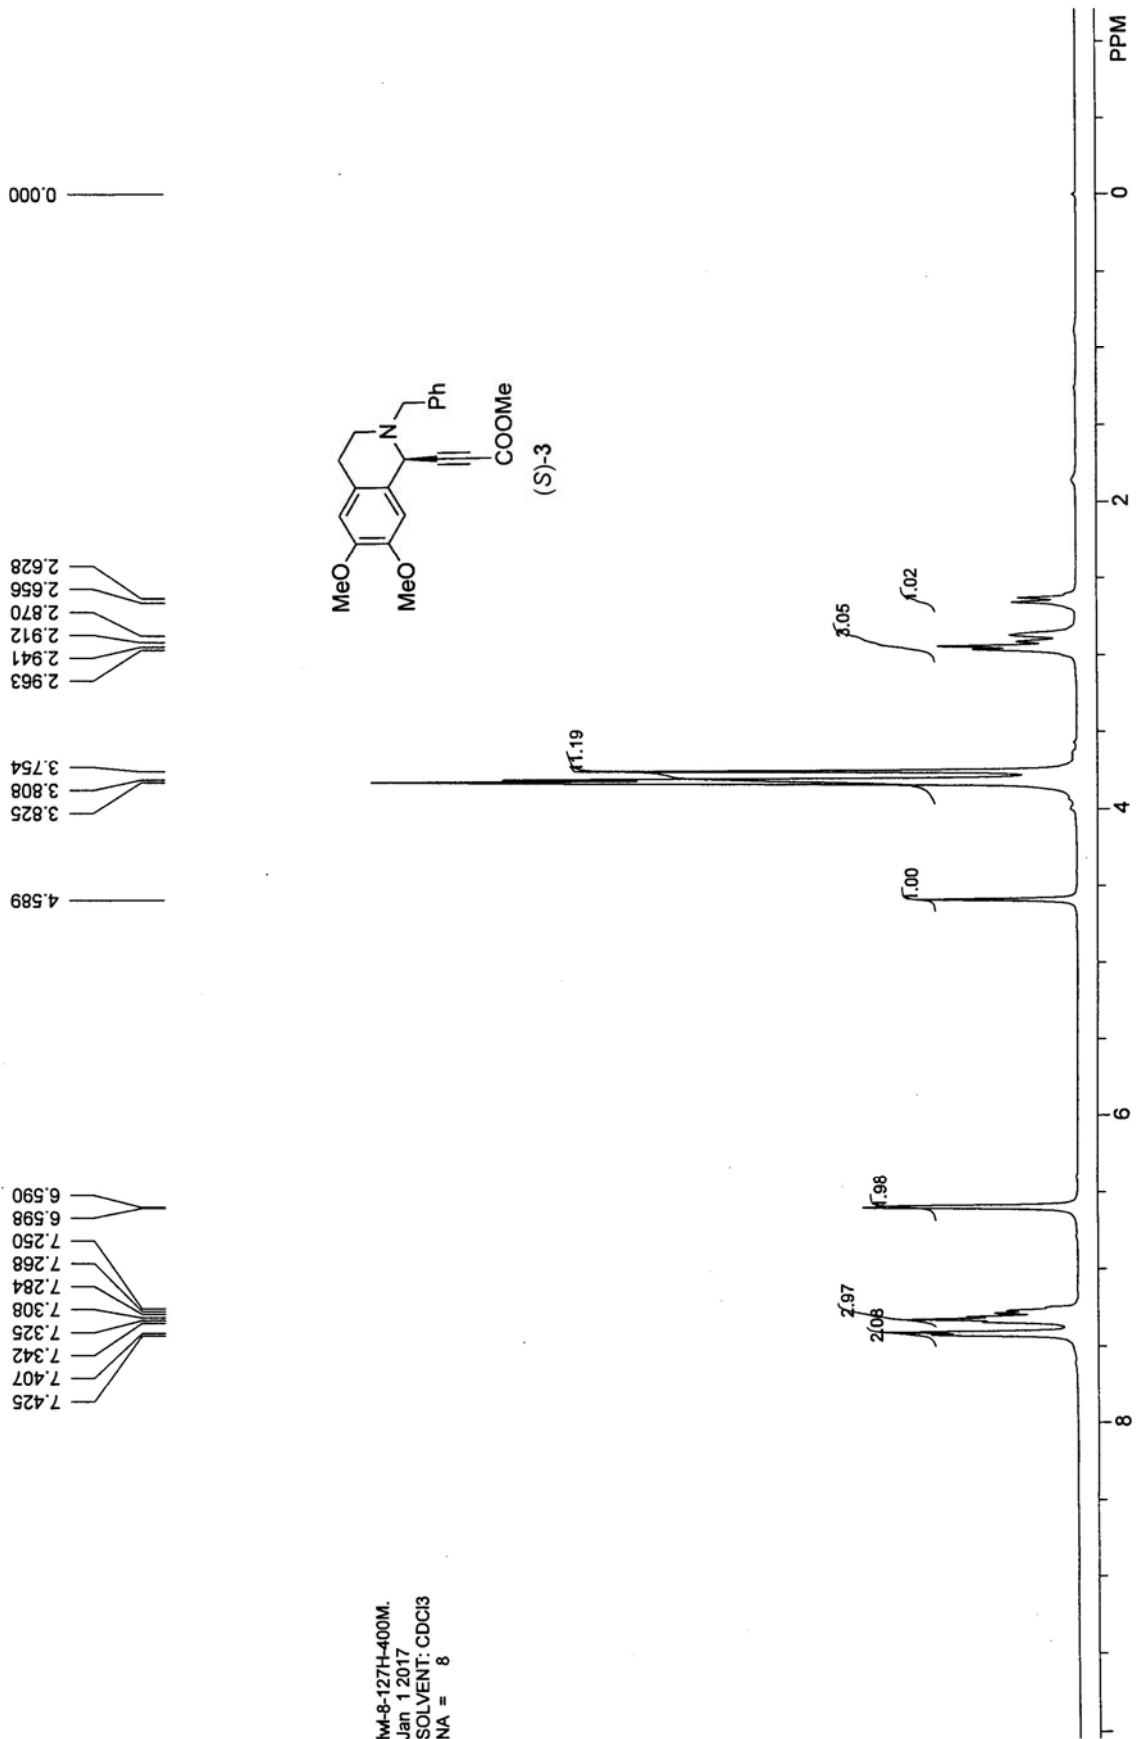

fw-8-127C-400M  
Jan 1 2017  
SOLVENT: cdcl3  
NA = 132

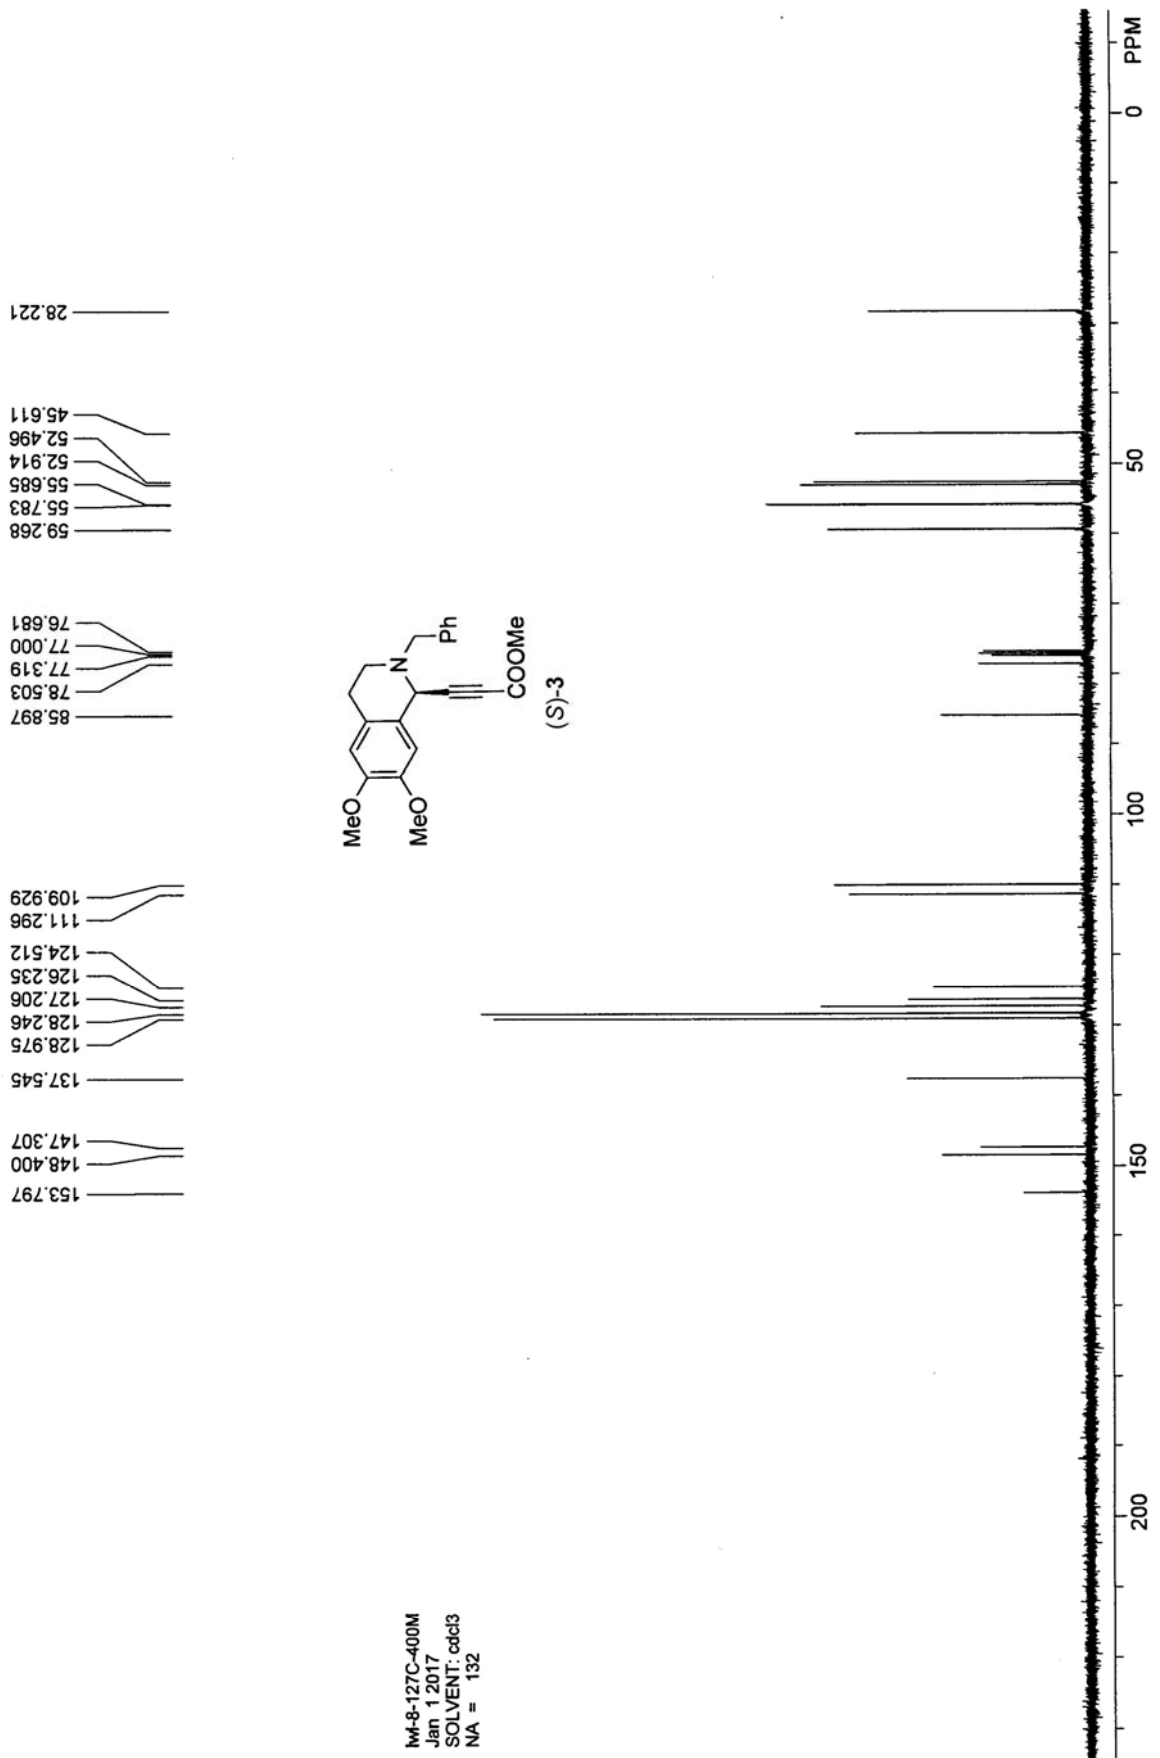

| SAMPLE INFORMATION |                          |                  |                       |
|--------------------|--------------------------|------------------|-----------------------|
| Sample Name:       | ML-8-127-es-h95-50.7-214 | Acquired By:     | Breeze                |
| Sample Type:       | 未知                       | Date Acquired:   | 2016/6/7 15:02:29 CST |
| Vial:              | 342                      | Acq. Method:     | zgj95                 |
| Injection #:       | 1                        | Date Processed:  | 2016/6/7 16:00:58 CST |
| Injection Volume:  | 10.00 $\mu$ l            | Channel Name:    | V0489 ChA             |
| Run Time:          | 25.00 Minutes            | Channel Desc.:   | V0489 ChA 214mm       |
| Column Type:       |                          | Sample Set Name: |                       |

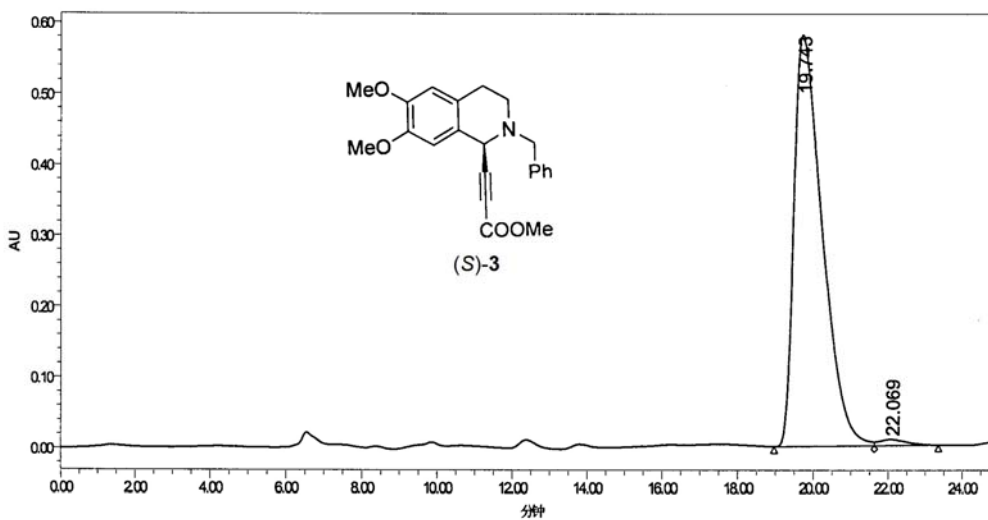

|   | RT (min) | Area (峰sec) | %Area | Hight (峰) | % Hight |
|---|----------|-------------|-------|-----------|---------|
| 1 | 19.743   | 30334430    | 98.48 | 580416    | 98.50   |
| 2 | 22.069   | 467148      | 1.52  | 8863      | 1.50    |



中国科学院上海有机化学研究所  
 Project Name: defaults for copy  
 Reported by User: Breeze user (Breeze)

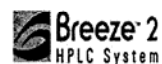

### SAMPLE INFORMATION

|                   |                             |                  |                     |
|-------------------|-----------------------------|------------------|---------------------|
| Sample Name:      | W-8-95-rac-as-h-95-50.7-214 | Acquired By:     | Breeze              |
| Sample Type:      | 未知                          | Date Acquired:   | 2016/7 15:32:54 CST |
| Val:              | 343                         | Acq. Method:     | zg95                |
| Injection#:       | 1                           | Date Processed:  | 2016/7 16:01:24 CST |
| Injection Volume: | 10.00 $\mu$ l               | Channel Name:    | W2489 ChA           |
| Run Time:         | 35.00 Minutes               | Channel Desc.:   | W2489 ChA.214mm     |
| Column Type:      |                             | Sample Set Name: |                     |

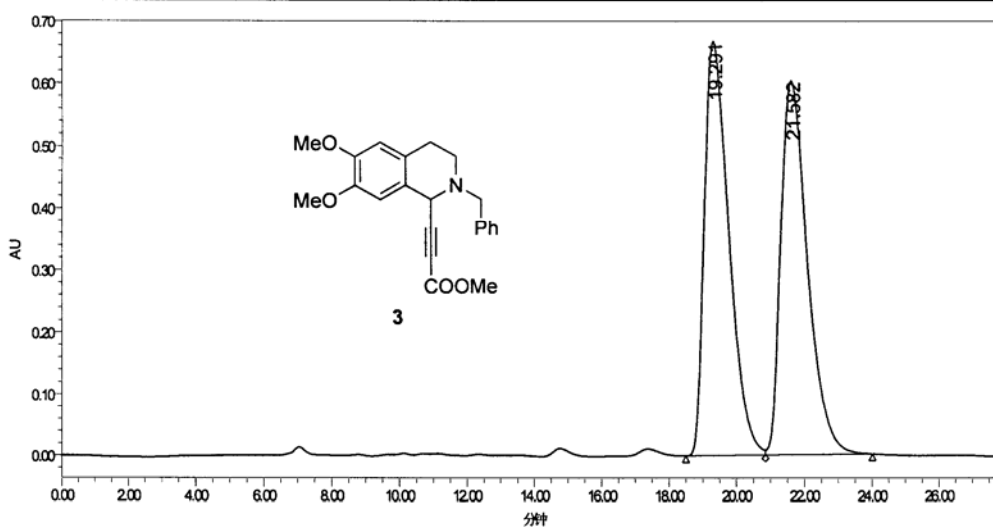

|   | RT<br>(min) | Area<br>(峰面积) | %Area | Hight<br>(峰高) | %<br>Hight |
|---|-------------|---------------|-------|---------------|------------|
| 1 | 19.291      | 33729892      | 50.41 | 666564        | 52.52      |
| 2 | 21.582      | 33185128      | 49.58 | 602668        | 47.48      |

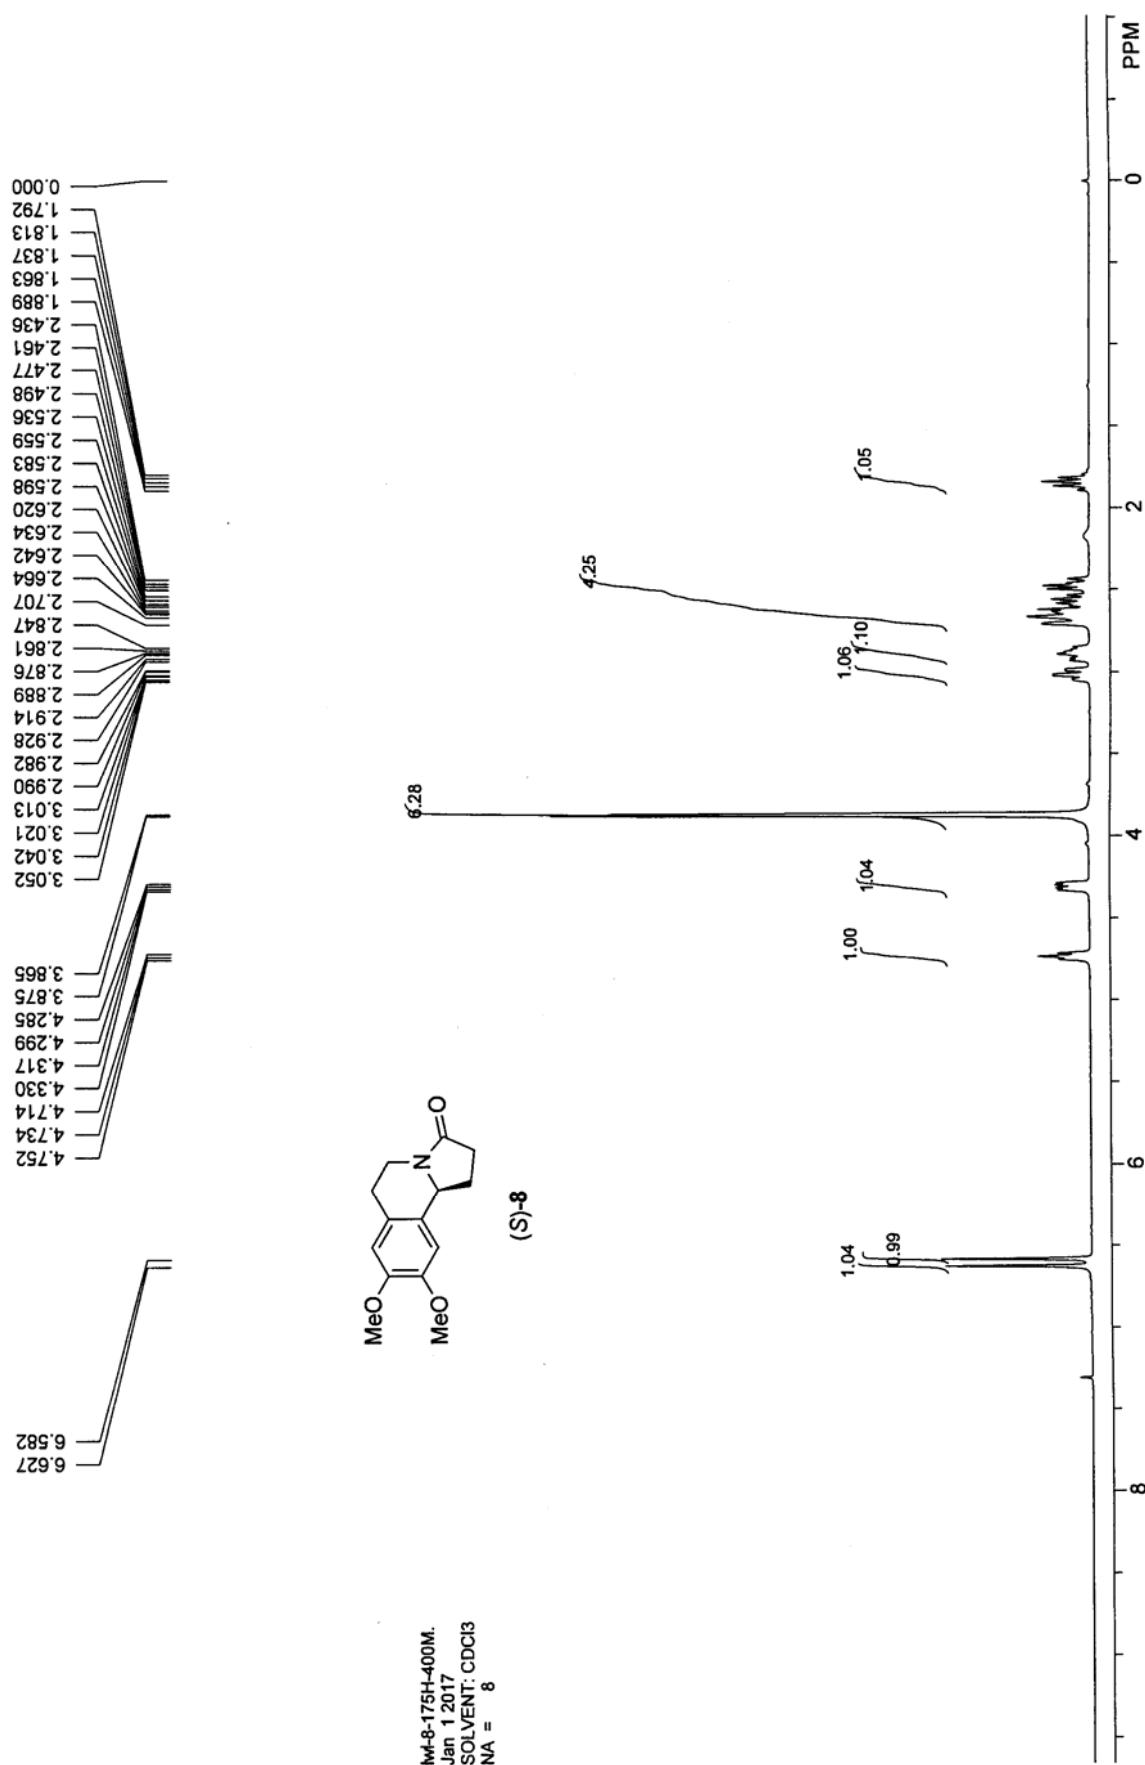

Mw-8-175H-400M.  
 Jan 1 2017  
 SOLVENT: CDCl3  
 NA = 8

hw-8-175C-400M  
Jan 1 2017  
SOLVENT: cdd3  
NA = 88

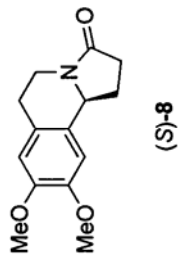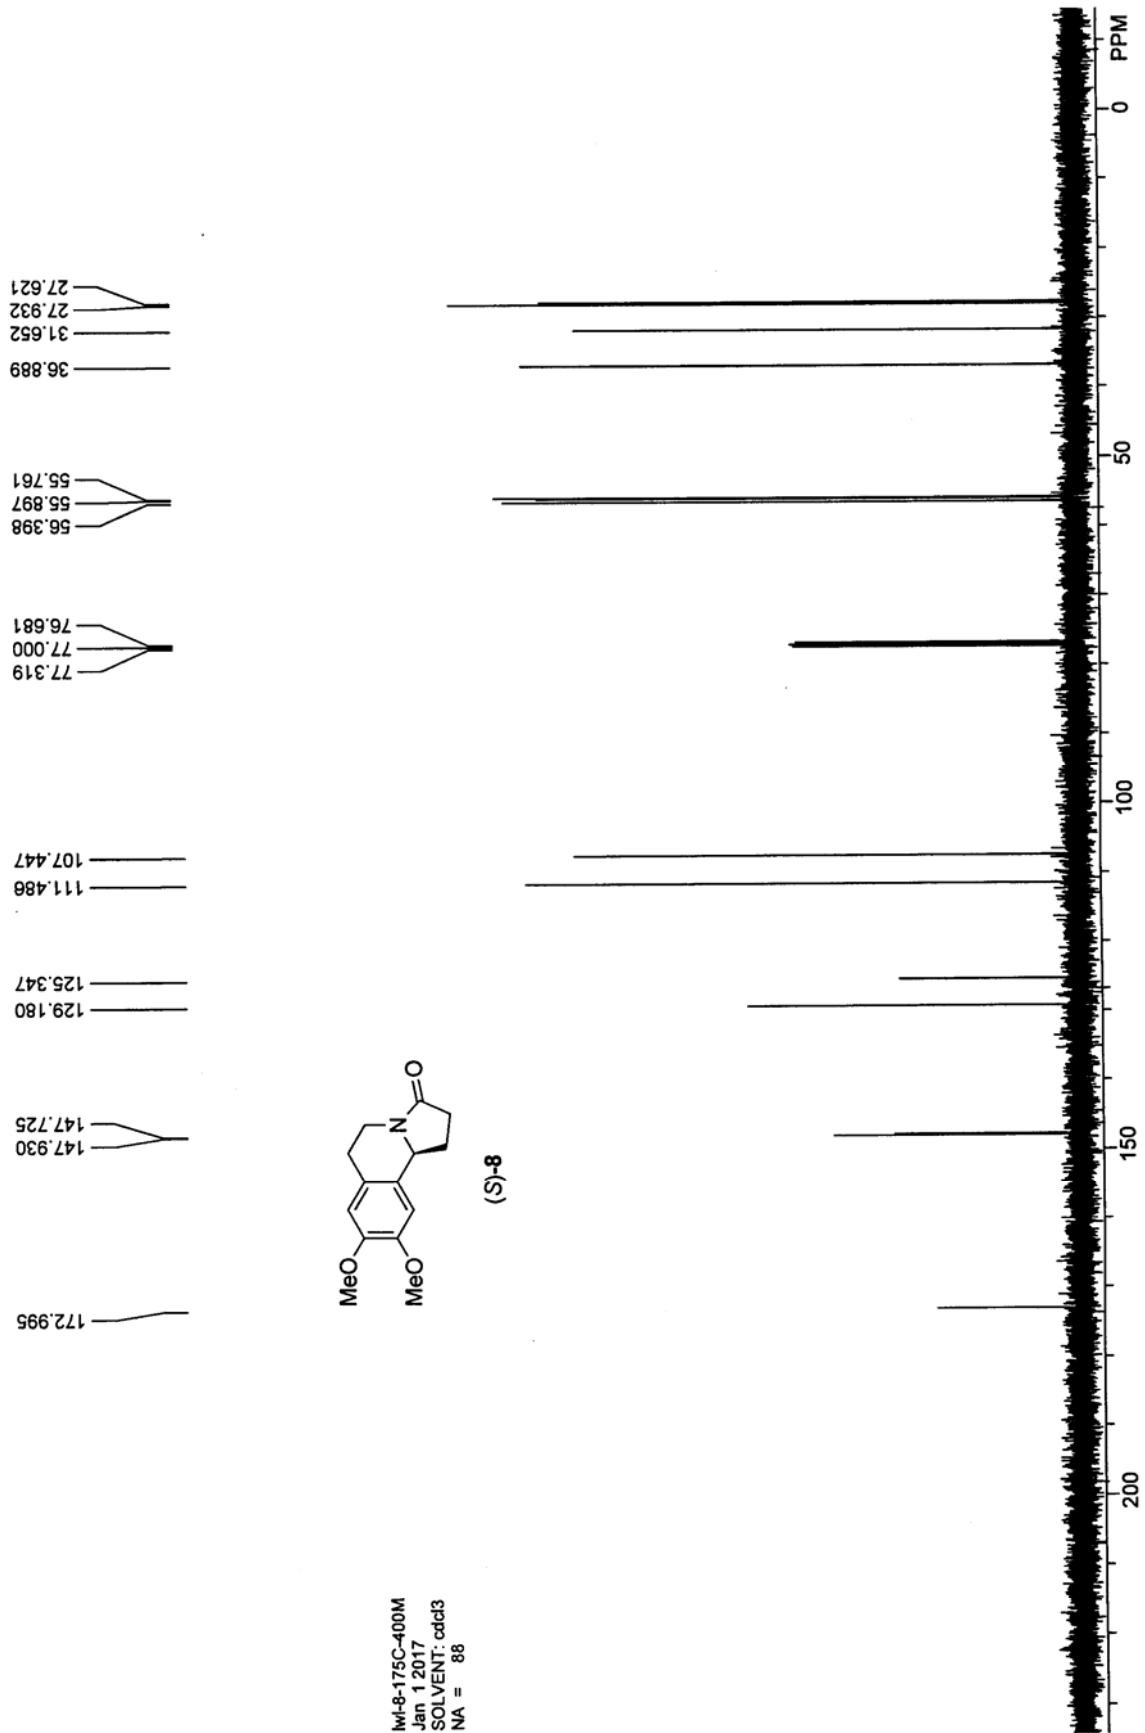

中国科学院上海有机化学研究所  
 Project Name: defaults for copy  
 Reported by User: Breeze user (Breeze)

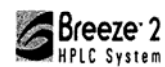

| SAMPLE INFORMATION |                            |                  |                        |
|--------------------|----------------------------|------------------|------------------------|
| Sample Name:       | W-8-175-as-h-60-40.0.9-214 | Acquired By:     | Breeze                 |
| Sample Type:       | 未知                         | Date Acquired:   | 2016/7/12 13:10:10 CST |
| Val:               | 519                        | Acq. Method:     | zq60                   |
| Injection #:       | 1                          | Date Processed:  | 2017/1/5 14:08:20 CST  |
| Injection Volume:  | 10.00 $\mu$ l              | Channel Name:    | W2489 ChA              |
| Run Time:          | 60.00 Minutes              | Channel Desc.:   | W2489 ChA.214nm        |
| Column Type:       |                            | Sample Set Name: |                        |

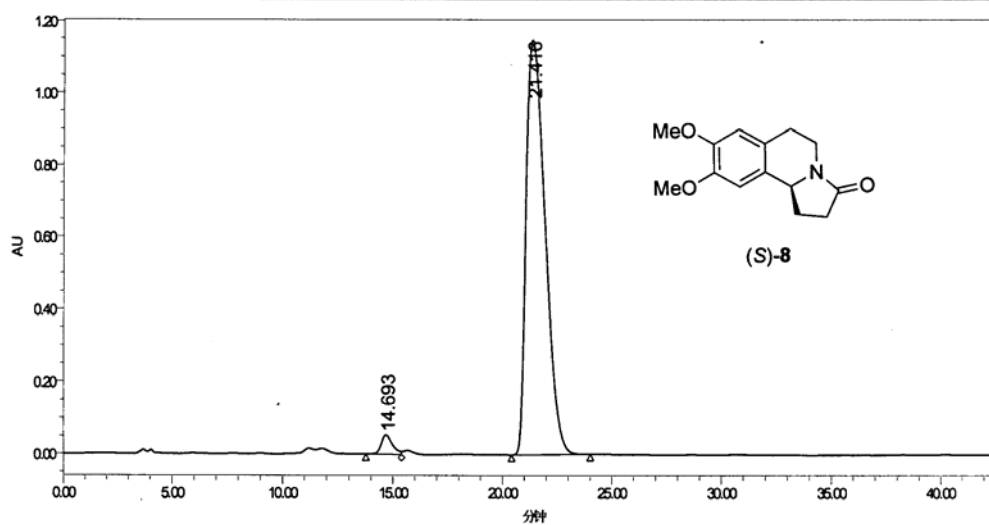

|   | RT<br>(min) | Area<br>(峰面积) | %Area | Height<br>(峰高) | %<br>Height |
|---|-------------|---------------|-------|----------------|-------------|
| 1 | 14.693      | 1897009       | 2.66  | 54344          | 4.52        |
| 2 | 21.416      | 6941366       | 97.34 | 1148891        | 95.48       |

| SAMPLE INFORMATION |                            |                  |                        |
|--------------------|----------------------------|------------------|------------------------|
| Sample Name:       | ML-S-103-as-h60-40-0.9-214 | Acquired By:     | Breeze                 |
| Sample Type:       | 未知                         | Date Acquired:   | 2016/7/12 13:55:01 CST |
| Vol:               | 520                        | Acq. Method:     | zg60                   |
| Injection #:       | 1                          | Date Processed:  | 2016/7/12 14:32:27 CST |
| Injection Volume:  | 10.00 $\mu$ l              | Channel Name:    | V2489 ChA              |
| Run Time:          | 60.00 Minutes              | Channel Desc.:   | V2489 ChA.214mm        |
| Column Type:       |                            | Sample Set Name: |                        |

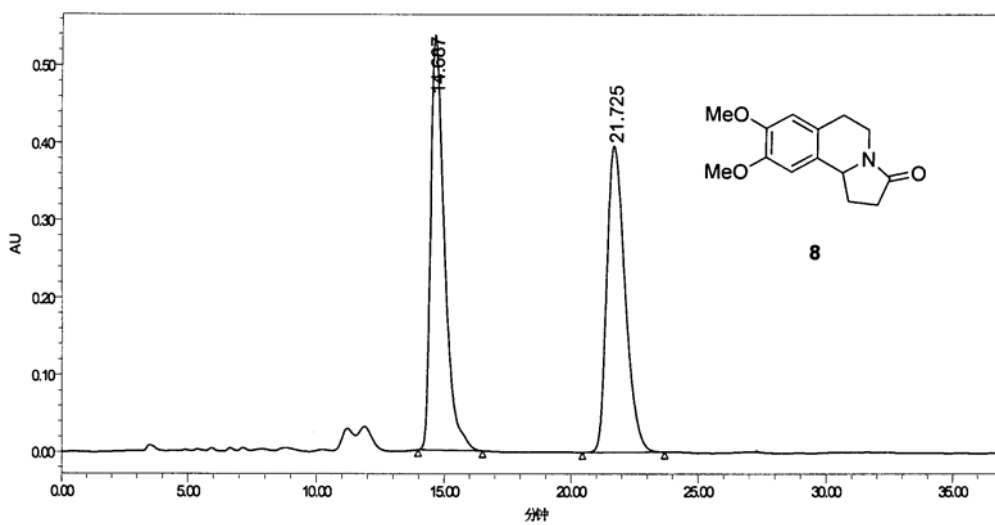

|   | RT (min) | Area (AreaSec) | %Area | Height (mm) | % Height |
|---|----------|----------------|-------|-------------|----------|
| 1 | 14.667   | 20206977       | 50.43 | 536311      | 57.52    |
| 2 | 21.725   | 19868195       | 49.57 | 396141      | 42.48    |

hw-8-176H-400M  
Jan 6 2017  
SOLVENT: dmso  
NA = 12

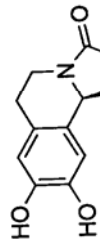

(S)-(-)-trolline

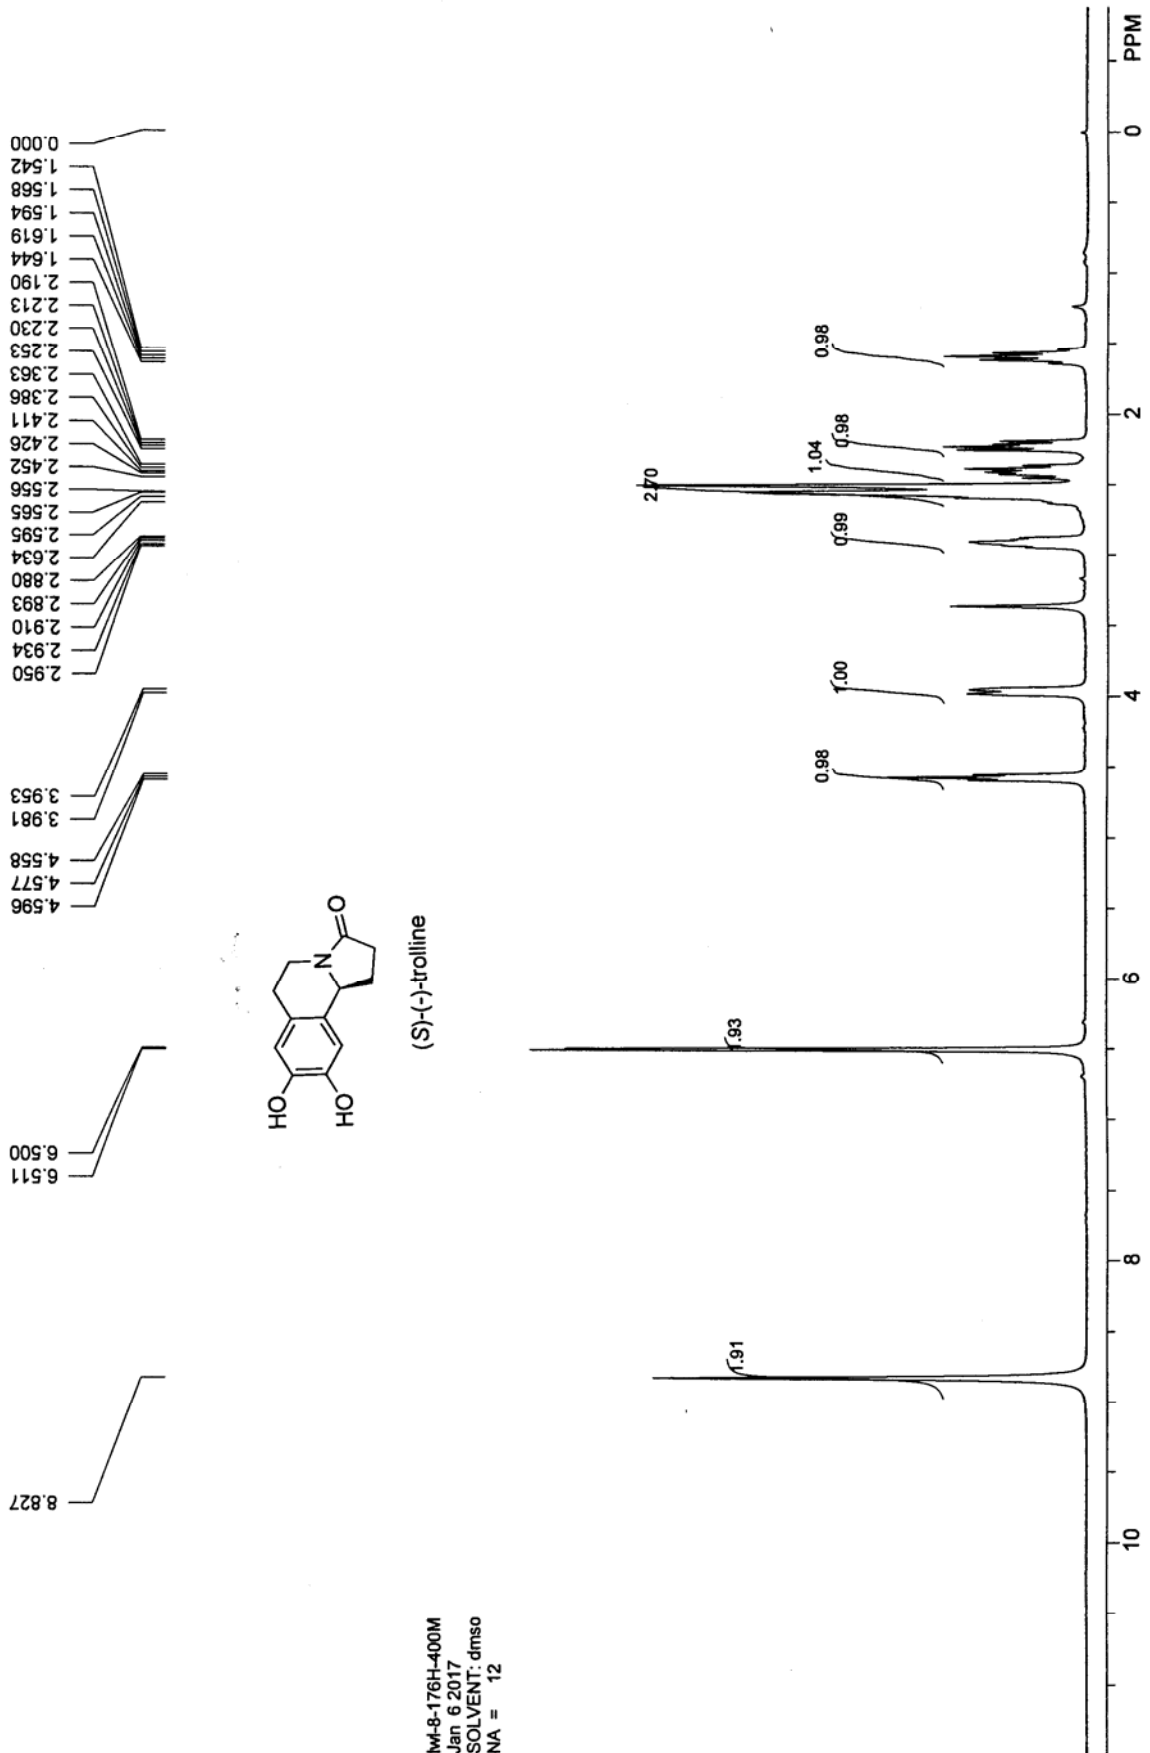

hwf-8-176C-400M  
Jan 4 2017  
SOLVENT: DMSO  
NA = 380

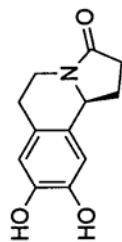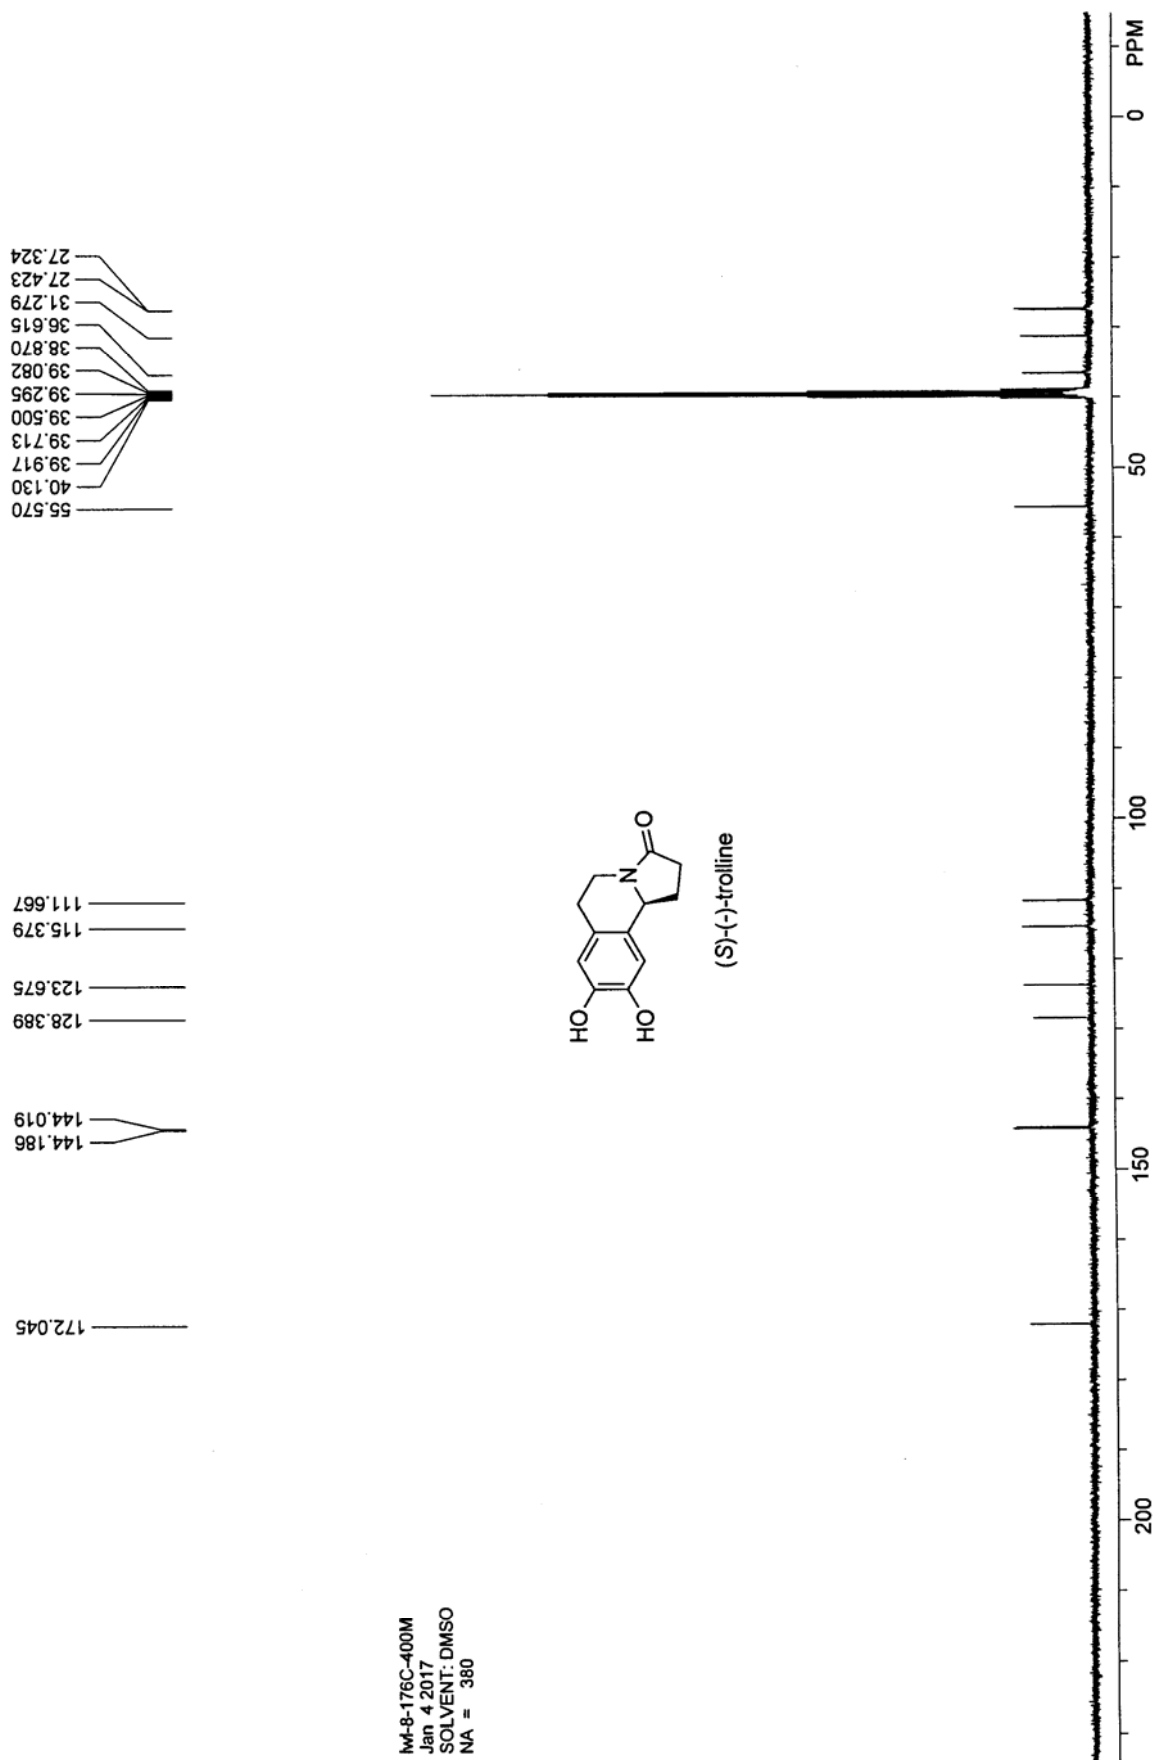

# lw1-6-176-ad-h-80-20-0.7-214

实验时间: 2016-07-18, 11:59:04

报告时间: 2016-07-18, 14:21:39

谱图文件: D:\zhuguangjiong\lw1\20160715\lw1-6-176-ad-h-80-20-0.7-214..org

实验内容简介:

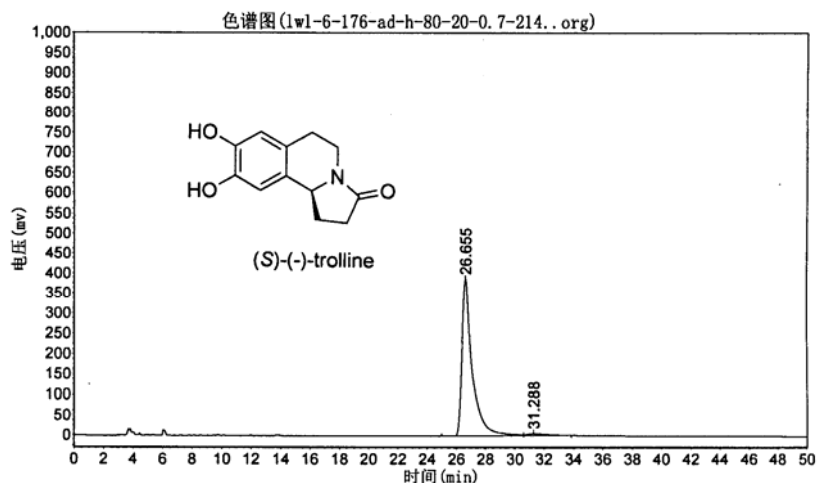

分析结果表

| 峰号 | 峰名 | 保留时间   | 峰高         | 峰面积          | 含量       |
|----|----|--------|------------|--------------|----------|
| 1  |    | 26.655 | 387796.844 | 19257308.000 | 97.5543  |
| 2  |    | 31.288 | 5129.015   | 482787.781   | 2.4457   |
| 总计 |    |        | 392925.859 | 19740095.781 | 100.0000 |



# lw1-6-165-ad-h-80-20-0.7-214

实验时间: 2016-07-18, 10:34:35

报告时间: 2016-07-18, 14:19:59

谱图文件: D:\zhuguangjiong\lw1\20160715\lw1-6-165-ad-h-80-20-0.7-214.org

实验内容简介:

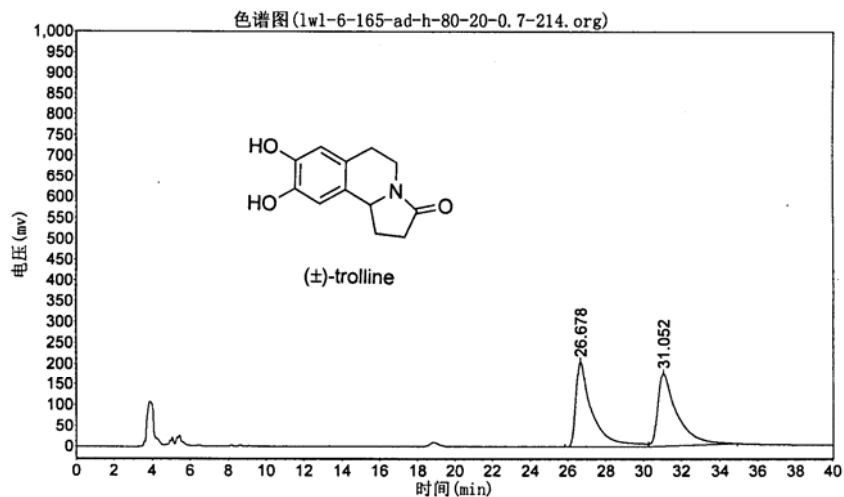

分析结果表

| 峰号 | 峰名 | 保留时间   | 峰高         | 峰面积          | 含量       |
|----|----|--------|------------|--------------|----------|
| 1  |    | 26.678 | 205491.141 | 12264055.000 | 49.9611  |
| 2  |    | 31.052 | 176385.266 | 12283133.000 | 50.0389  |
| 总计 |    |        | 381876.406 | 24547188.000 | 100.0000 |

Int-8-169H-400M  
Jan 1 2017  
SOLVENT: CDCl3  
NA = 12

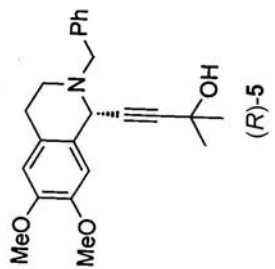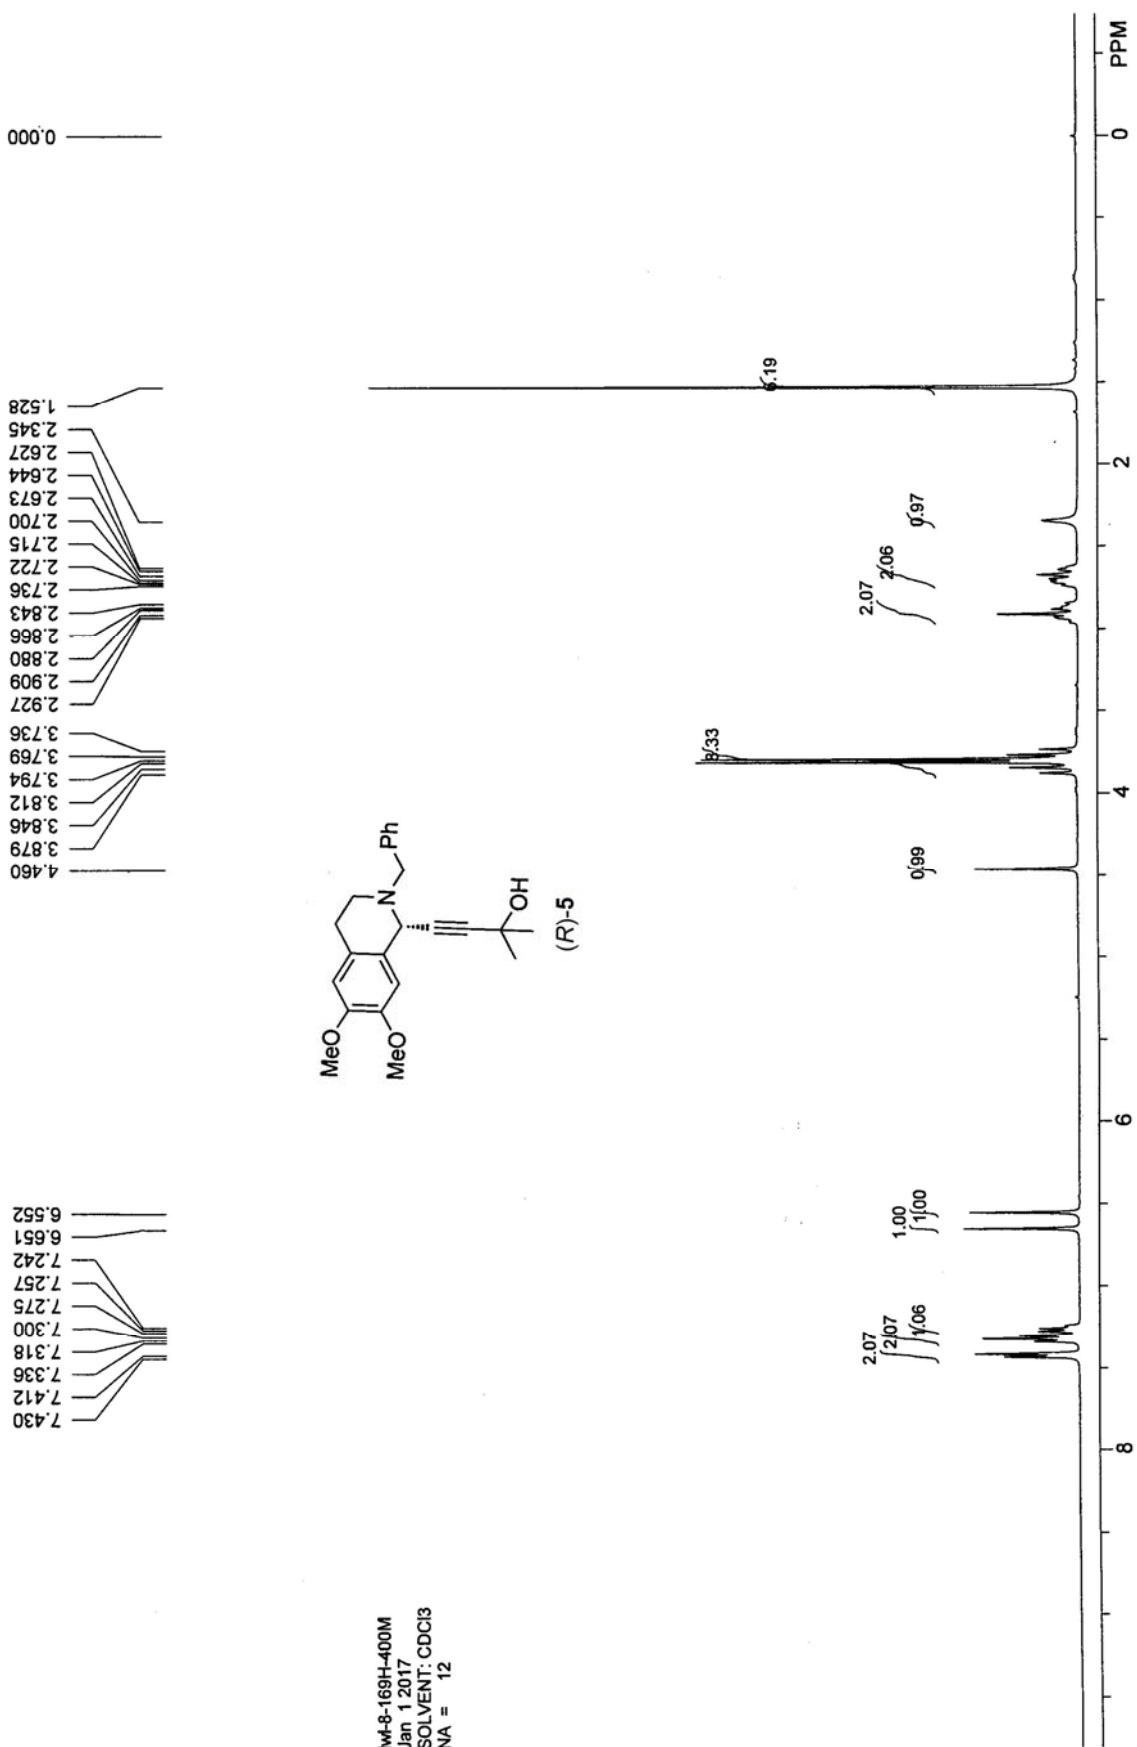

Inv-8-169C-400M  
Jan 1 2017  
SOLVENT: cdcl3  
NA = 72

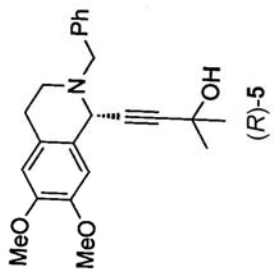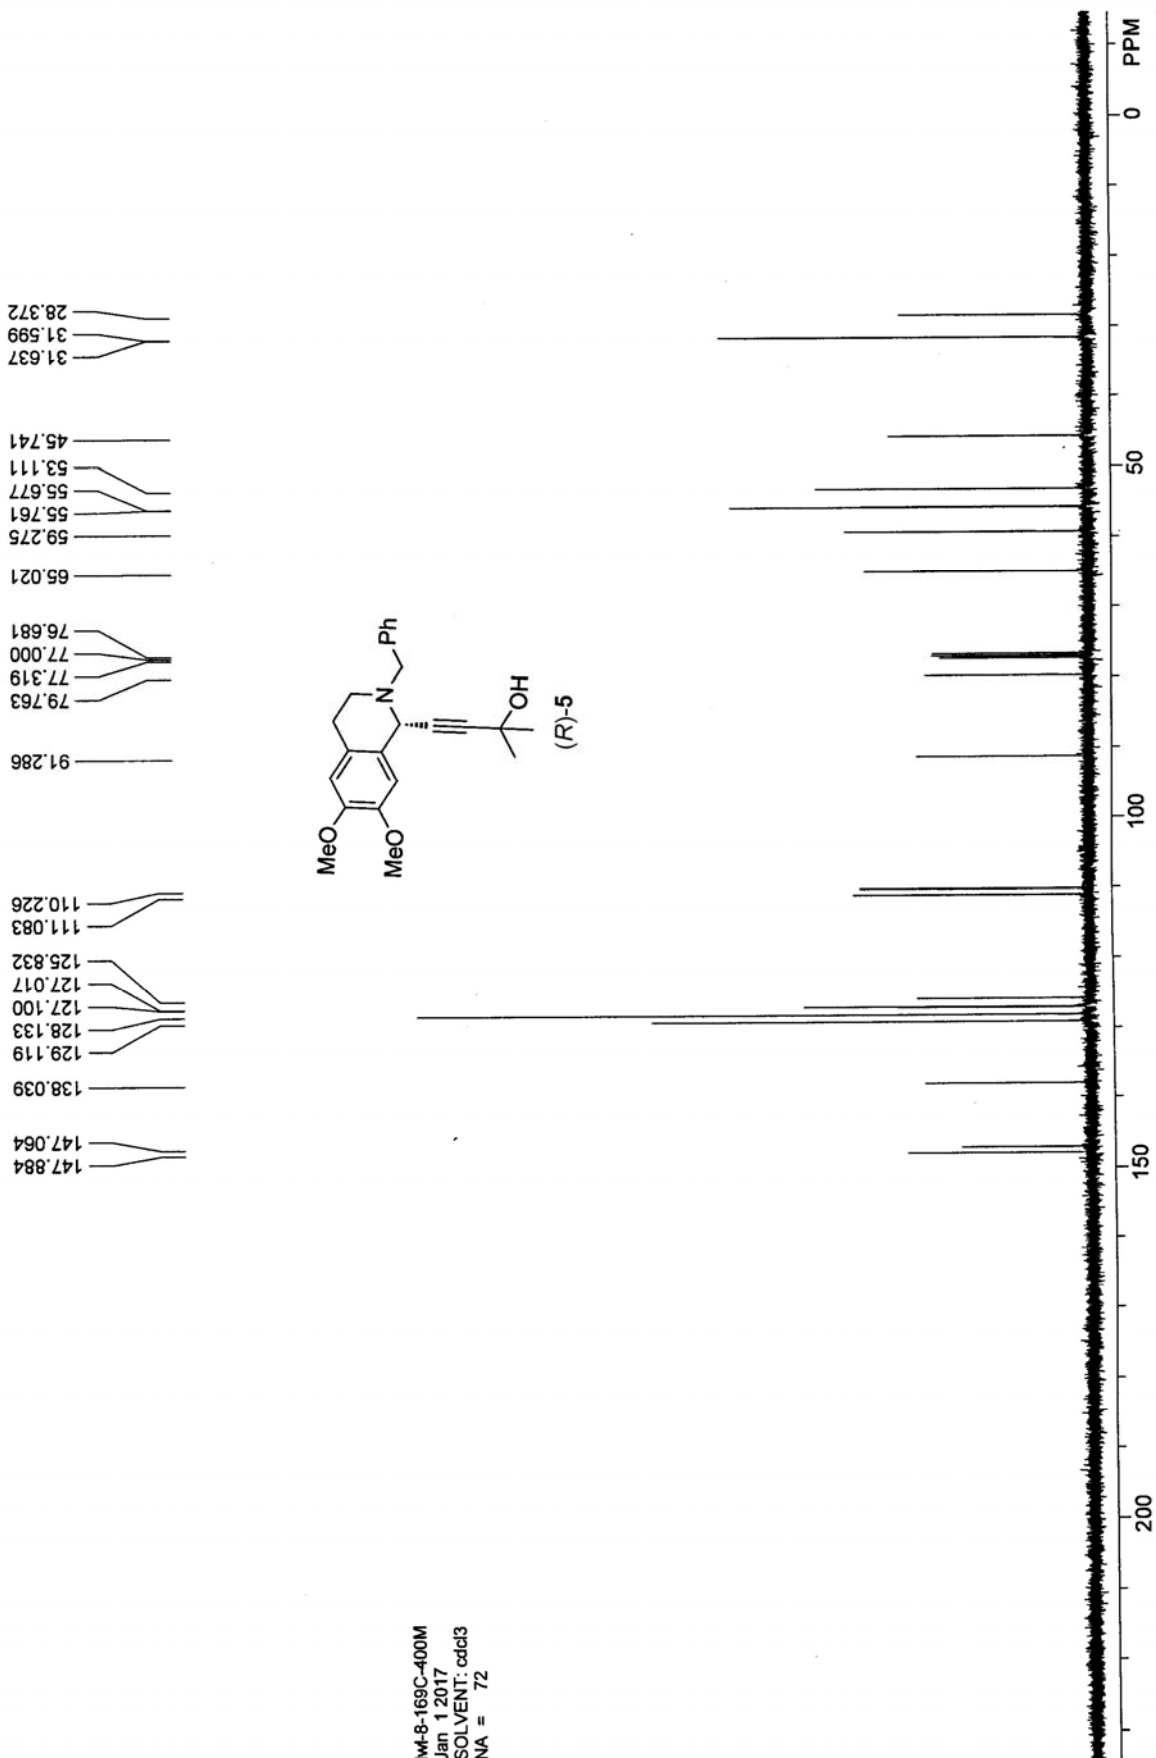

# lw1-8-169-as-h-80-20-0.3-214

实验时间: 2016-07-08, 15:31:21

报告时间: 2016-07-08, 16:20:34

谱图文件: D:\zhuguangjiong\lw1\20160708\lw1-8-169-as-h-80-20-0.3-214..org

实验内容简介:

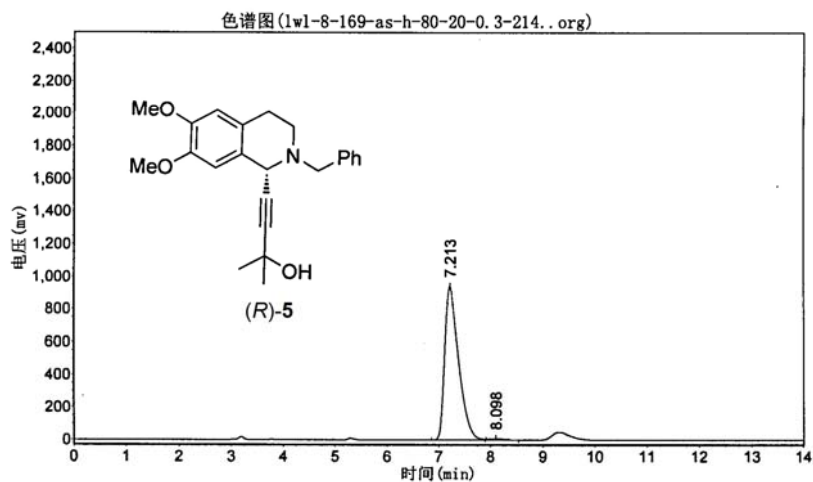

分析结果表

| 峰号 | 峰名 | 保留时间  | 峰高         | 峰面积          | 含量       |
|----|----|-------|------------|--------------|----------|
| 1  |    | 7.213 | 939515.250 | 17365022.000 | 99.1271  |
| 2  |    | 8.098 | 7629.566   | 152906.203   | 0.8729   |
| 总计 |    |       | 947144.816 | 17517928.203 | 100.0000 |

# lw1-8-79-rac-as-h-80-20-0.3-214

实验时间: 2016-07-08, 16:04:10

报告时间: 2016-07-08, 16:19:29

谱图文件: D:\zhuguangjiong\lw1\20160708\lw1-8-79-rac-as-h-80-20-0.3-214...org

实验内容简介:

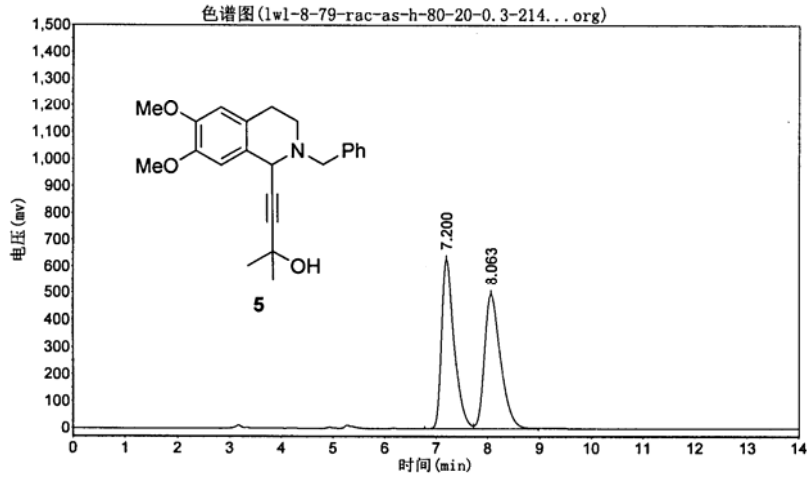

分析结果表

| 峰号 | 峰名 | 保留时间  | 峰高          | 峰面积          | 含量       |
|----|----|-------|-------------|--------------|----------|
| 1  |    | 7.200 | 628420.563  | 10683695.000 | 49.6762  |
| 2  |    | 8.063 | 496522.750  | 10822957.000 | 50.3238  |
| 总计 |    |       | 1124943.313 | 21506652.000 | 100.0000 |

hw-8-170H-400M  
Jan 1 2017  
SOLVENT: CDCl3  
NA = 12

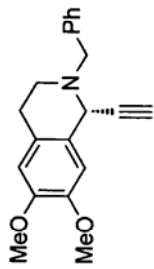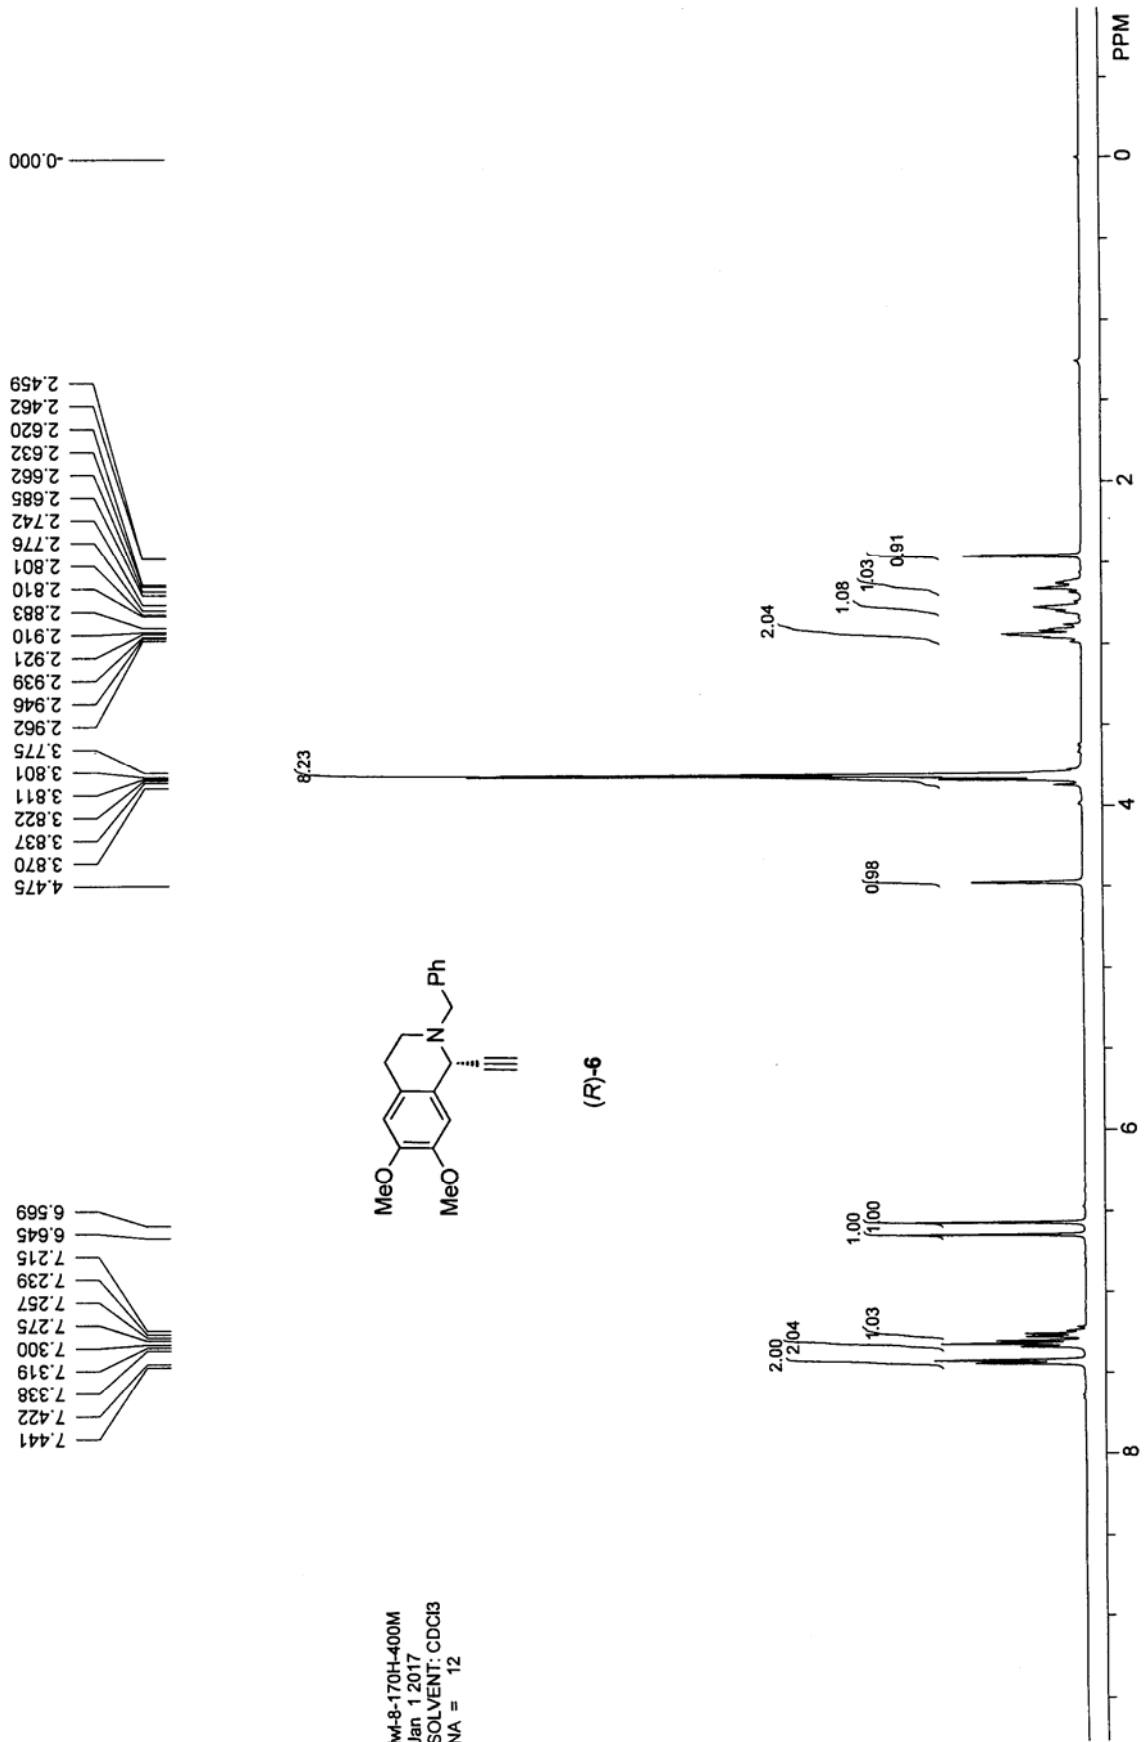

WI-B-170C-400M  
Jan 2 2017  
SOLVENT: cdcl3  
NA = 80

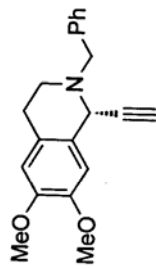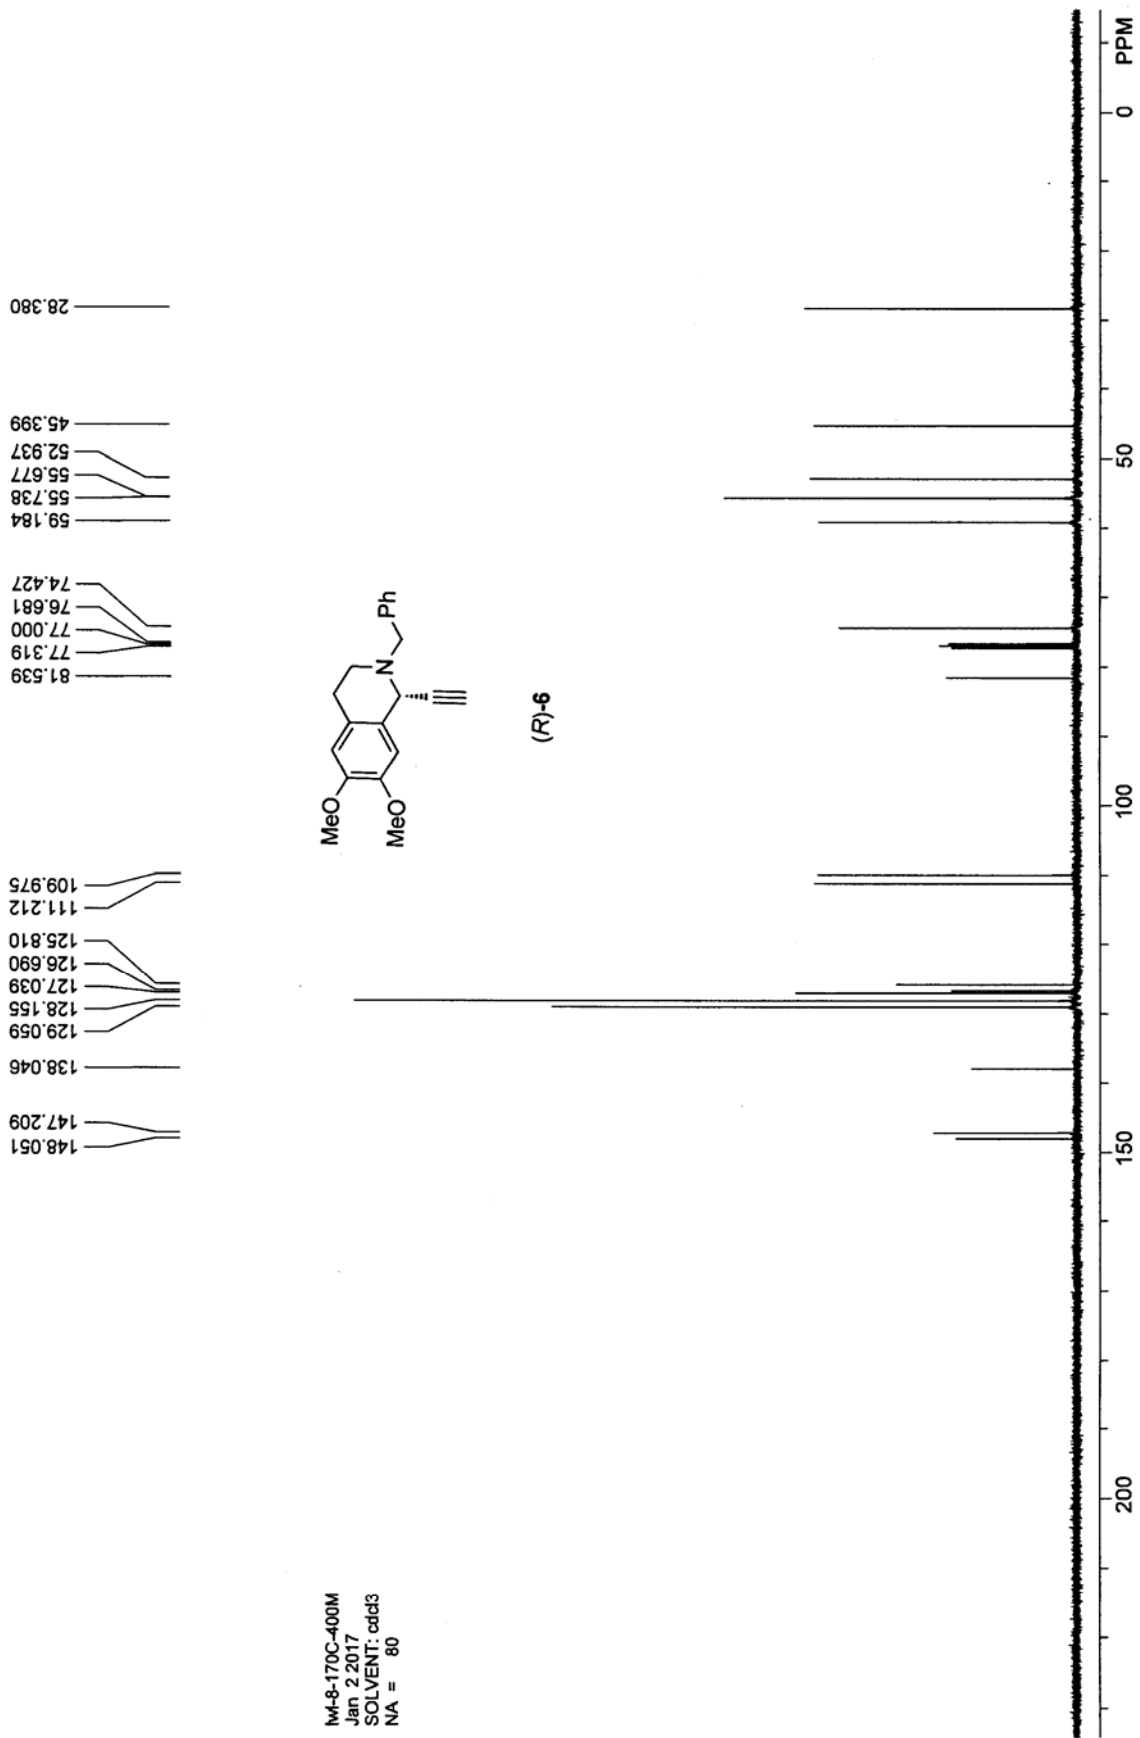

# lw1-8-170-as-h-95-5-0.5-214

实验时间: 2016-07-12, 13:09:19

报告时间: 2016-07-12, 16:49:27

谱图文件: D:\zhuguangjiong\lw1\20160712\lw1-8-170-as-h-95-5-0.5-214.org

实验内容简介:

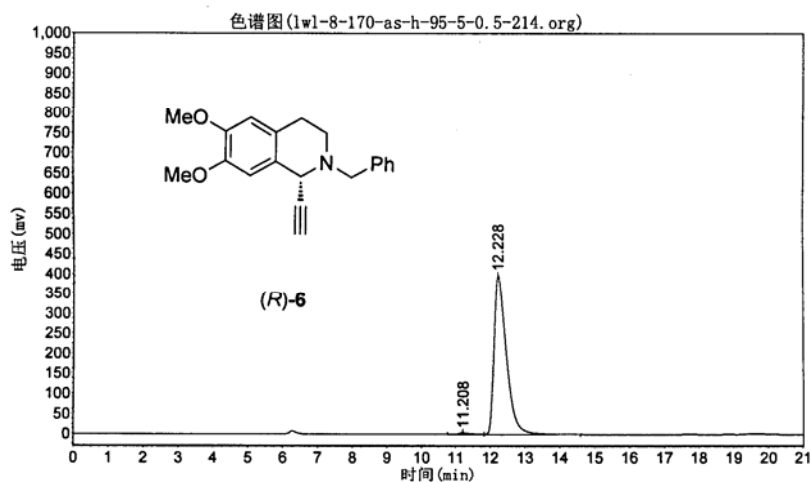

分析结果表

| 峰号 | 峰名 | 保留时间   | 峰高         | 峰面积         | 含量       |
|----|----|--------|------------|-------------|----------|
| 1  |    | 11.208 | 4008.512   | 95695.750   | 0.9643   |
| 2  |    | 12.228 | 398254.656 | 9828306.000 | 99.0357  |
| 总计 |    |        | 402263.169 | 9924001.750 | 100.0000 |



# lw1-8-94-as-h-95-5-0.5-214

实验时间: 2016-07-12, 14:28:33

报告时间: 2016-07-12, 16:50:17

谱图文件: D:\zhuguangjiong\lw1\20160712\lw1-8-94-as-h-95-5-0.5-214..org

实验内容简介:

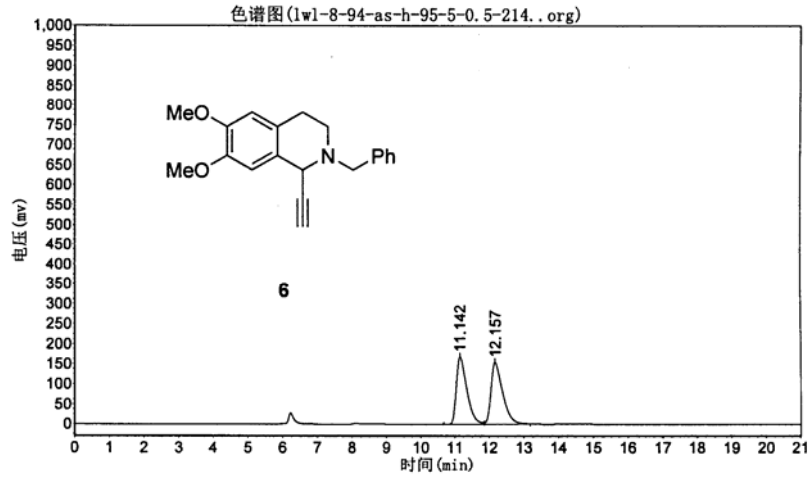

分析结果表

| 峰号 | 峰名 | 保留时间   | 峰高         | 峰面积         | 含量       |
|----|----|--------|------------|-------------|----------|
| 1  |    | 11.142 | 170422.797 | 3661086.000 | 49.8538  |
| 2  |    | 12.157 | 155838.422 | 3682554.750 | 50.1462  |
| 总计 |    |        | 326261.219 | 7343640.750 | 100.0000 |

MF-8-171H-400M  
Jan 1 2017  
SOLVENT: CDCl3  
NA = 12

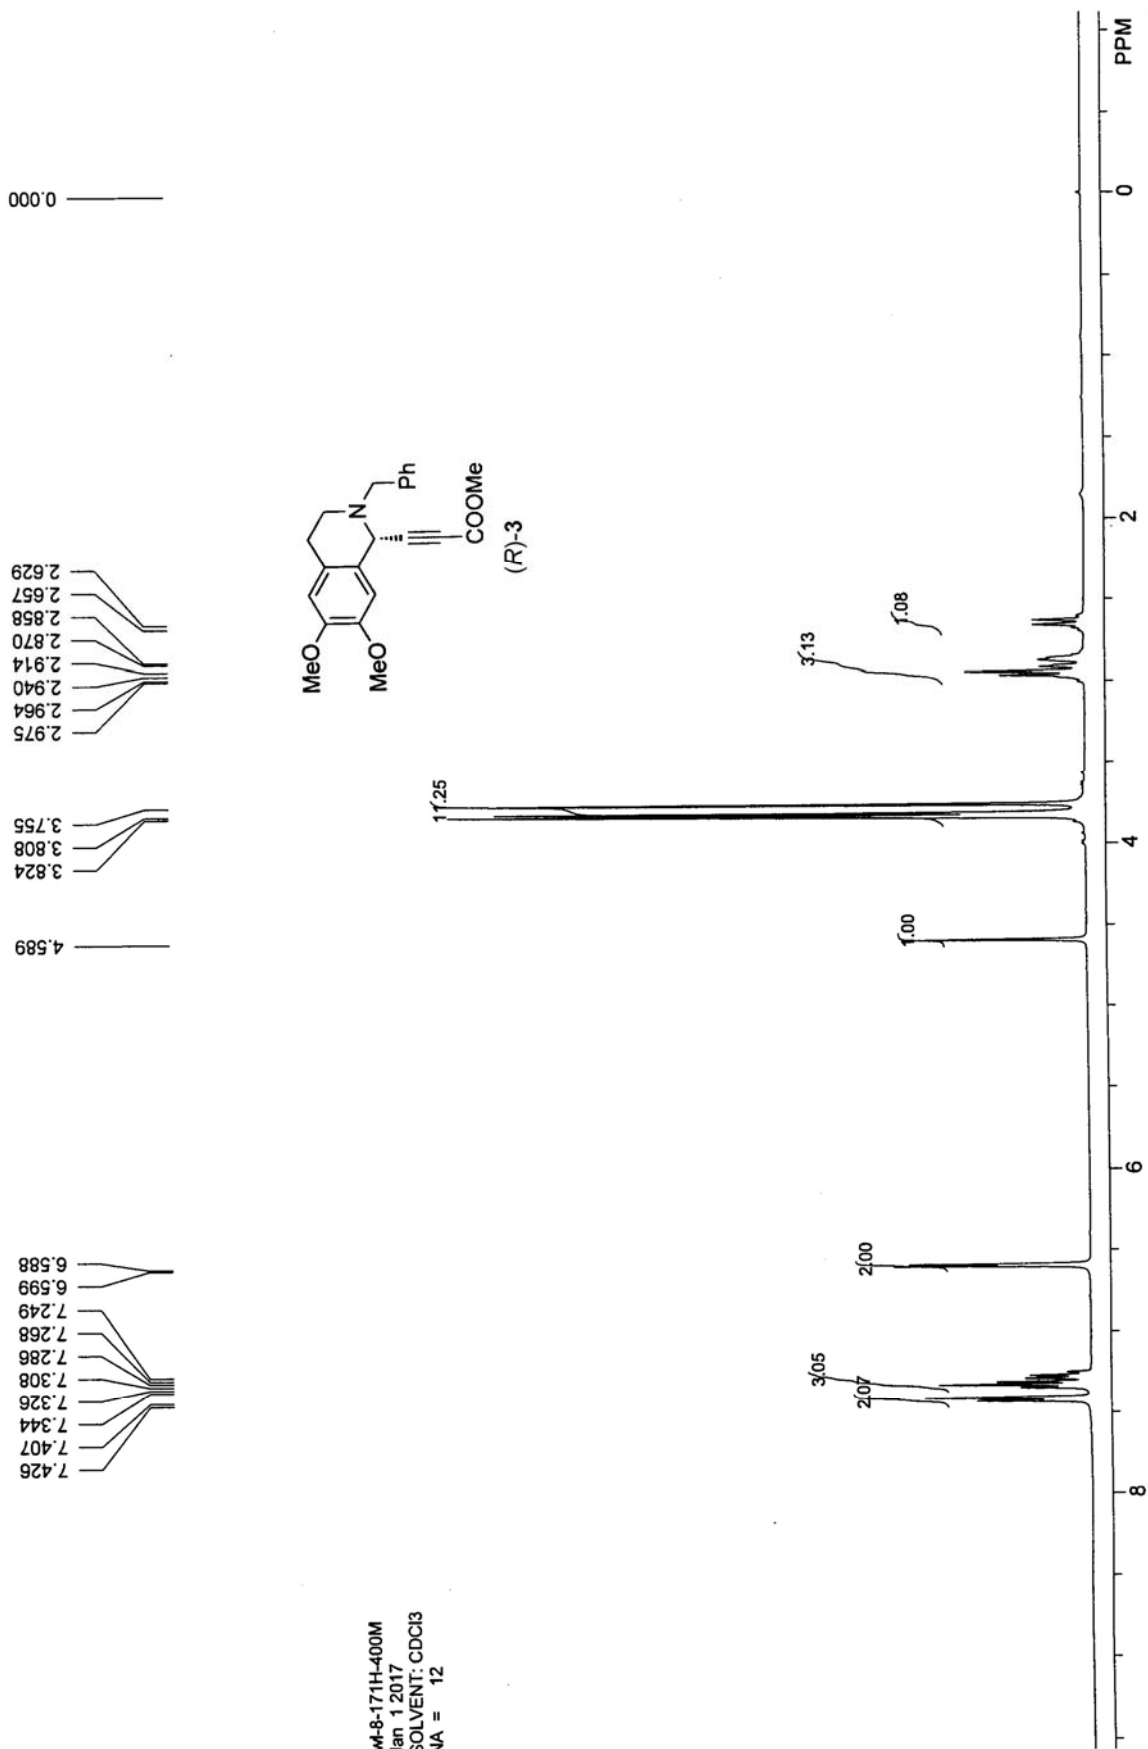

hw-8-171C-400M  
Jan 1, 2017  
SOLVENT: cdcl3  
NA = 48

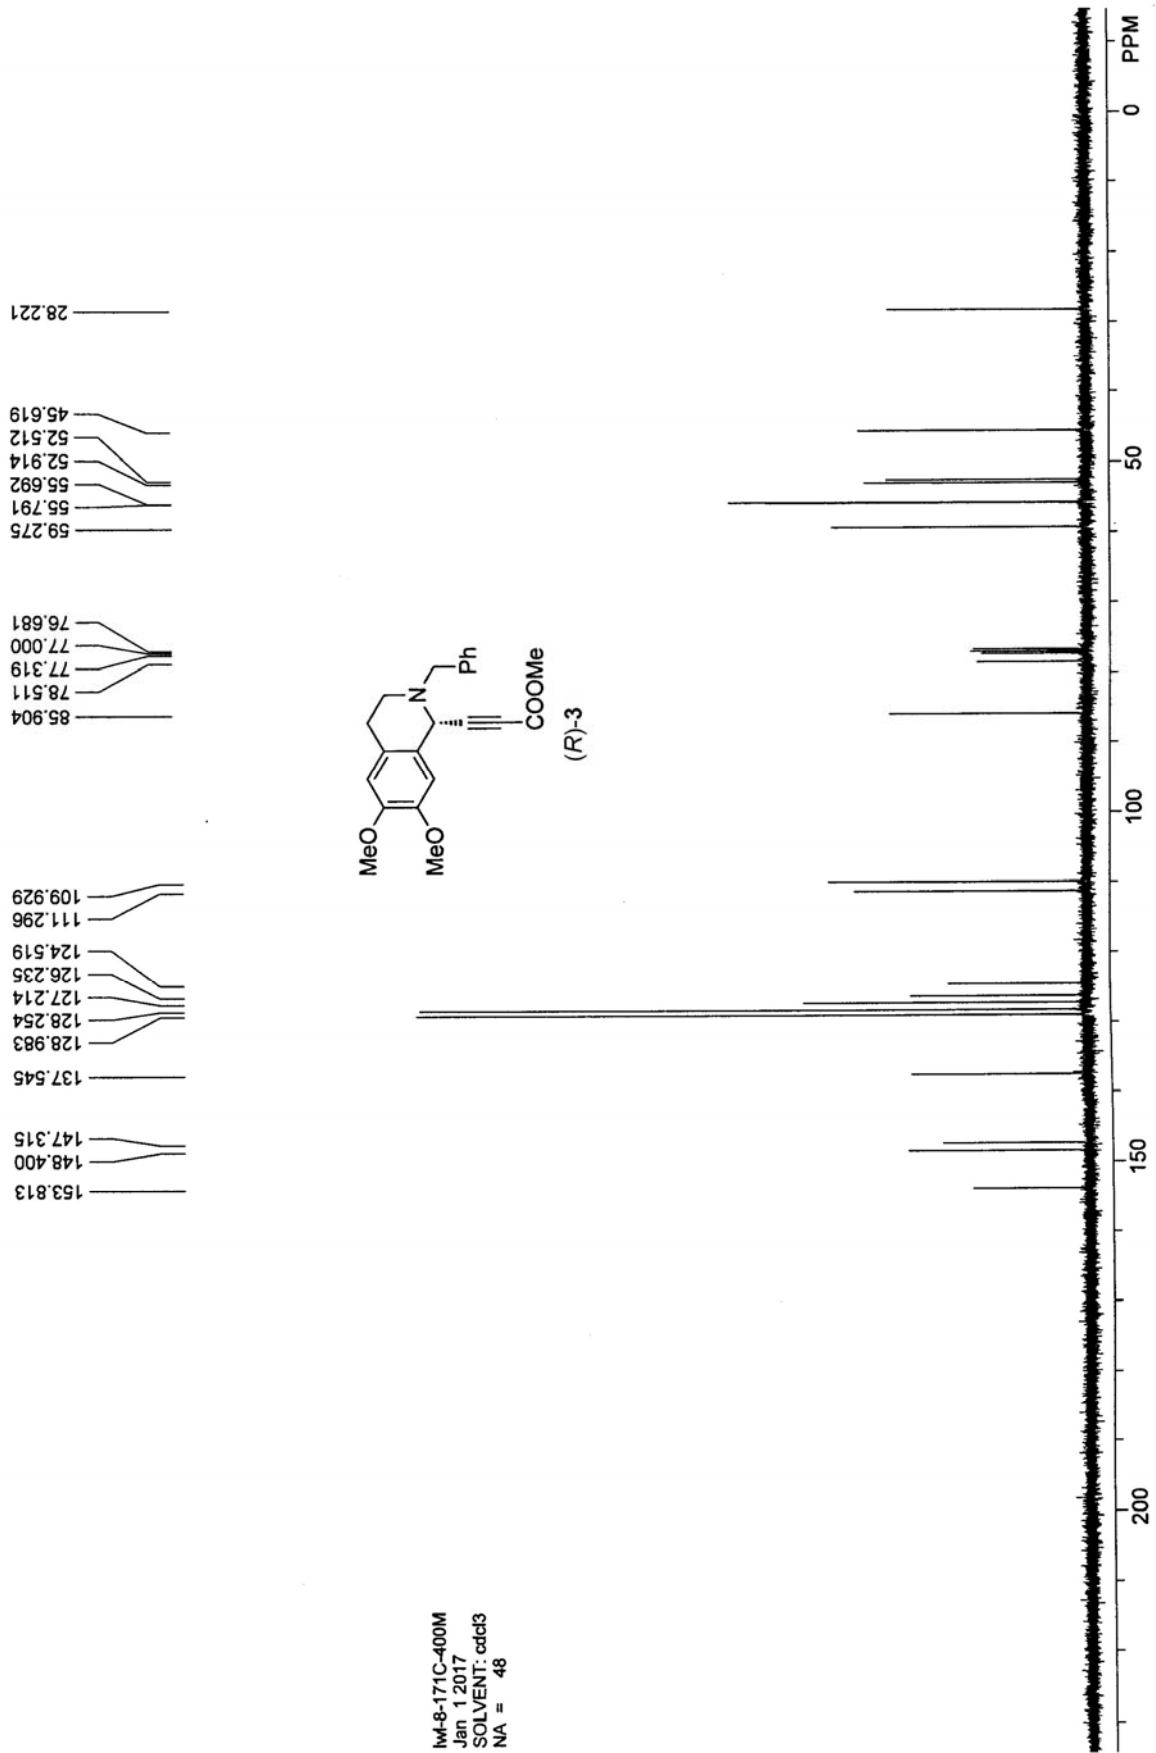

# lw1-8-171-as-h-95-5-0.7-214

实验时间: 2016-07-12, 12:24:33

报告时间: 2016-07-12, 16:53:27

谱图文件: D:\zhuguangjiong\lw1\20160712\lw1-8-171-as-h-95-5-0.7-214...org

实验内容简介:

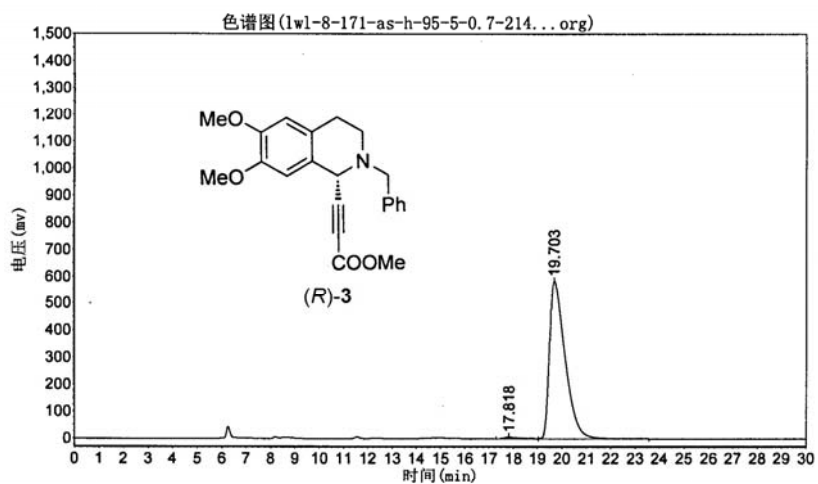

分析结果表

| 峰号 | 峰名 | 保留时间   | 峰高         | 峰面积          | 含量       |
|----|----|--------|------------|--------------|----------|
| 1  |    | 17.818 | 6508.380   | 286700.844   | 1.0883   |
| 2  |    | 19.703 | 584125.688 | 26056760.000 | 98.9117  |
| 总计 |    |        | 590634.068 | 26343460.844 | 100.0000 |

# lw1-8-95-as-h-95-5-0.7-214

实验时间: 2016-07-12, 10:27:10

报告时间: 2016-07-12, 16:52:30

谱图文件: D:\zhuguangjiong\lw1\20160712\lw1-8-95-as-h-95-5-0.7-214.org

实验内容简介:

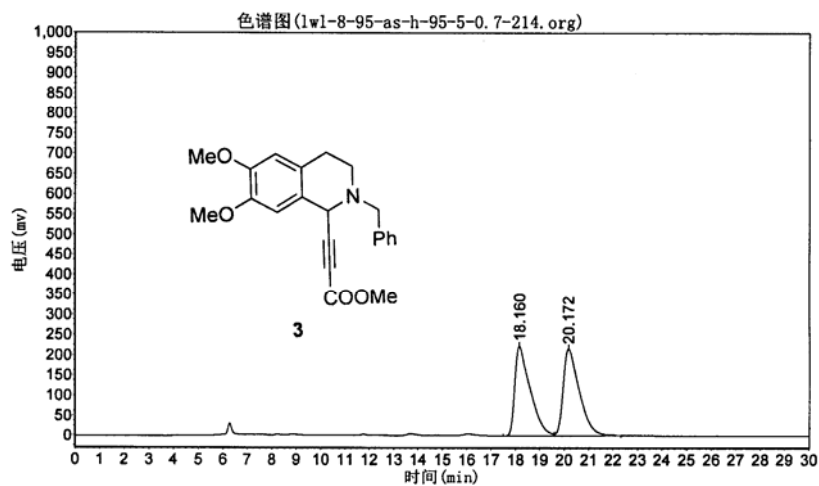

分析结果表

| 峰号 | 峰名 | 保留时间   | 峰高         | 峰面积          | 含量       |
|----|----|--------|------------|--------------|----------|
| 1  |    | 18.160 | 223219.625 | 9787908.000  | 49.5280  |
| 2  |    | 20.172 | 216943.656 | 9974457.000  | 50.4720  |
| 总计 |    |        | 440163.281 | 19762365.000 | 100.0000 |

hw-8-183H-400M  
Jan 1 2017  
SOLVENT: CDCl3  
NA = 8

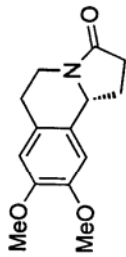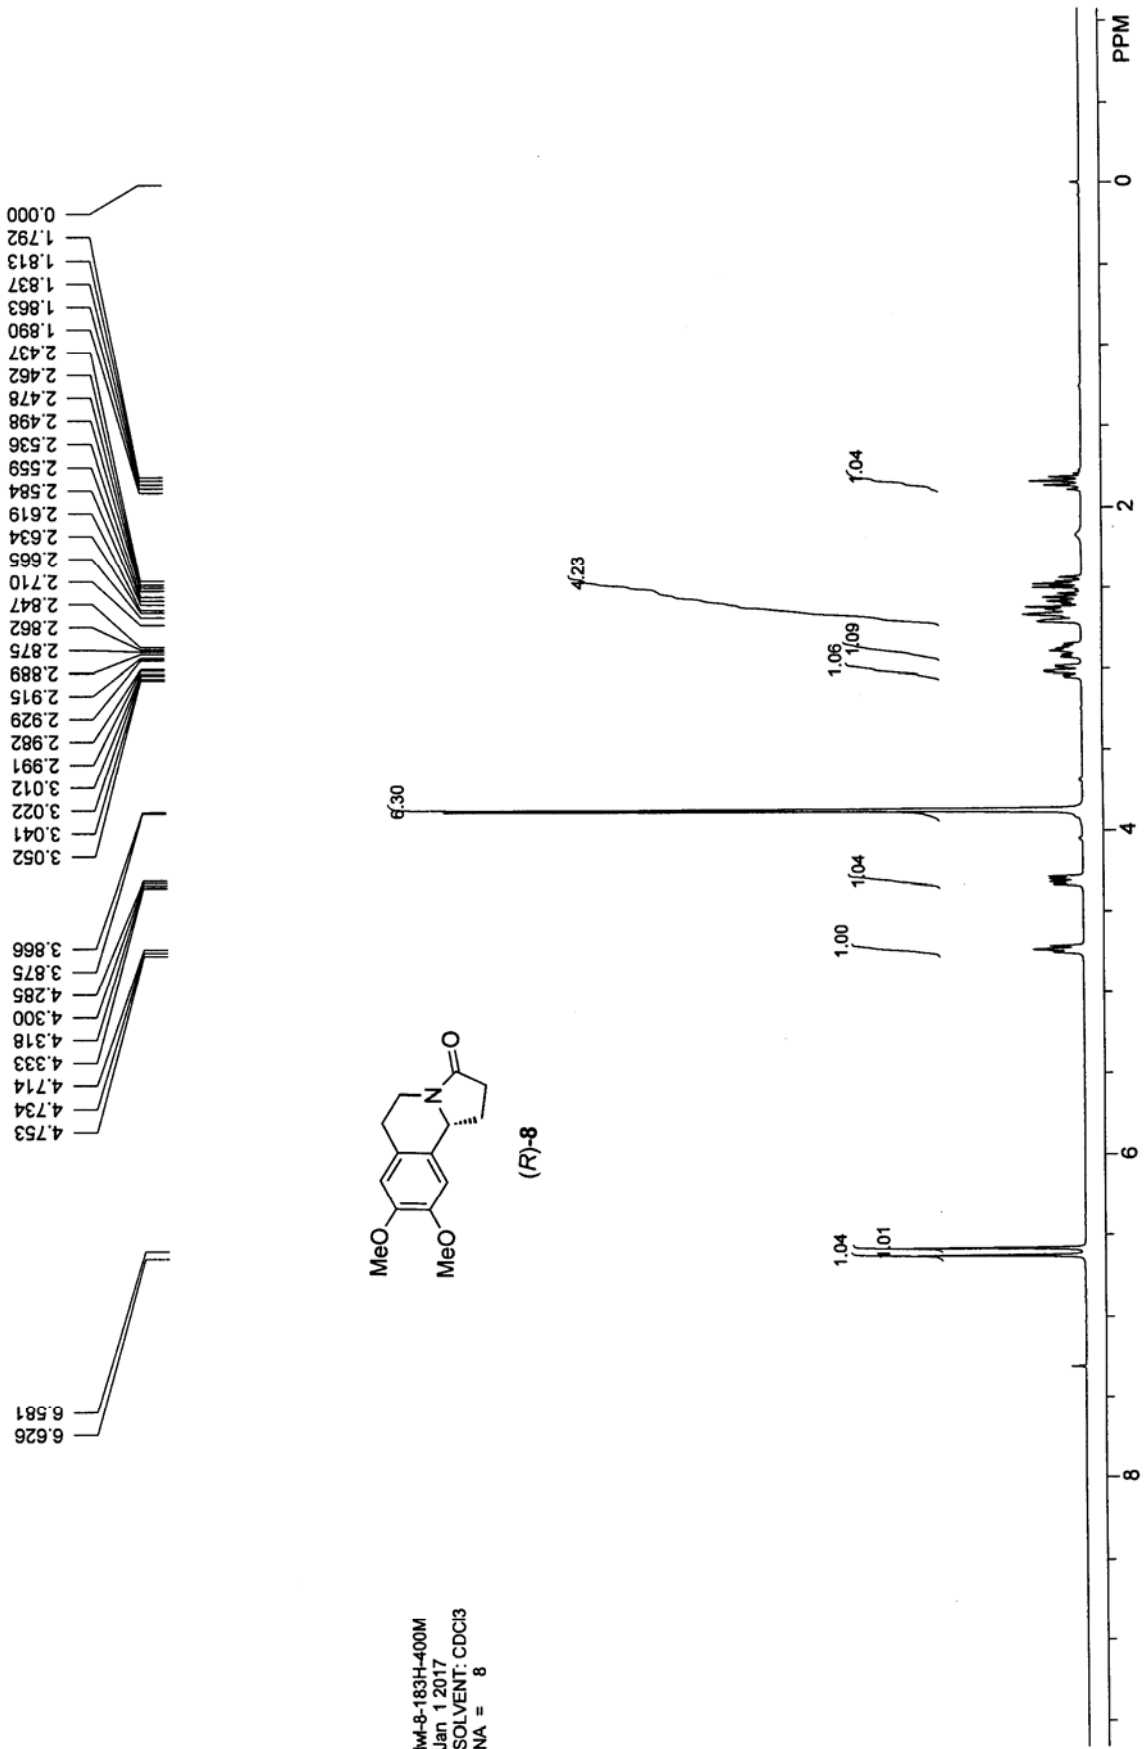

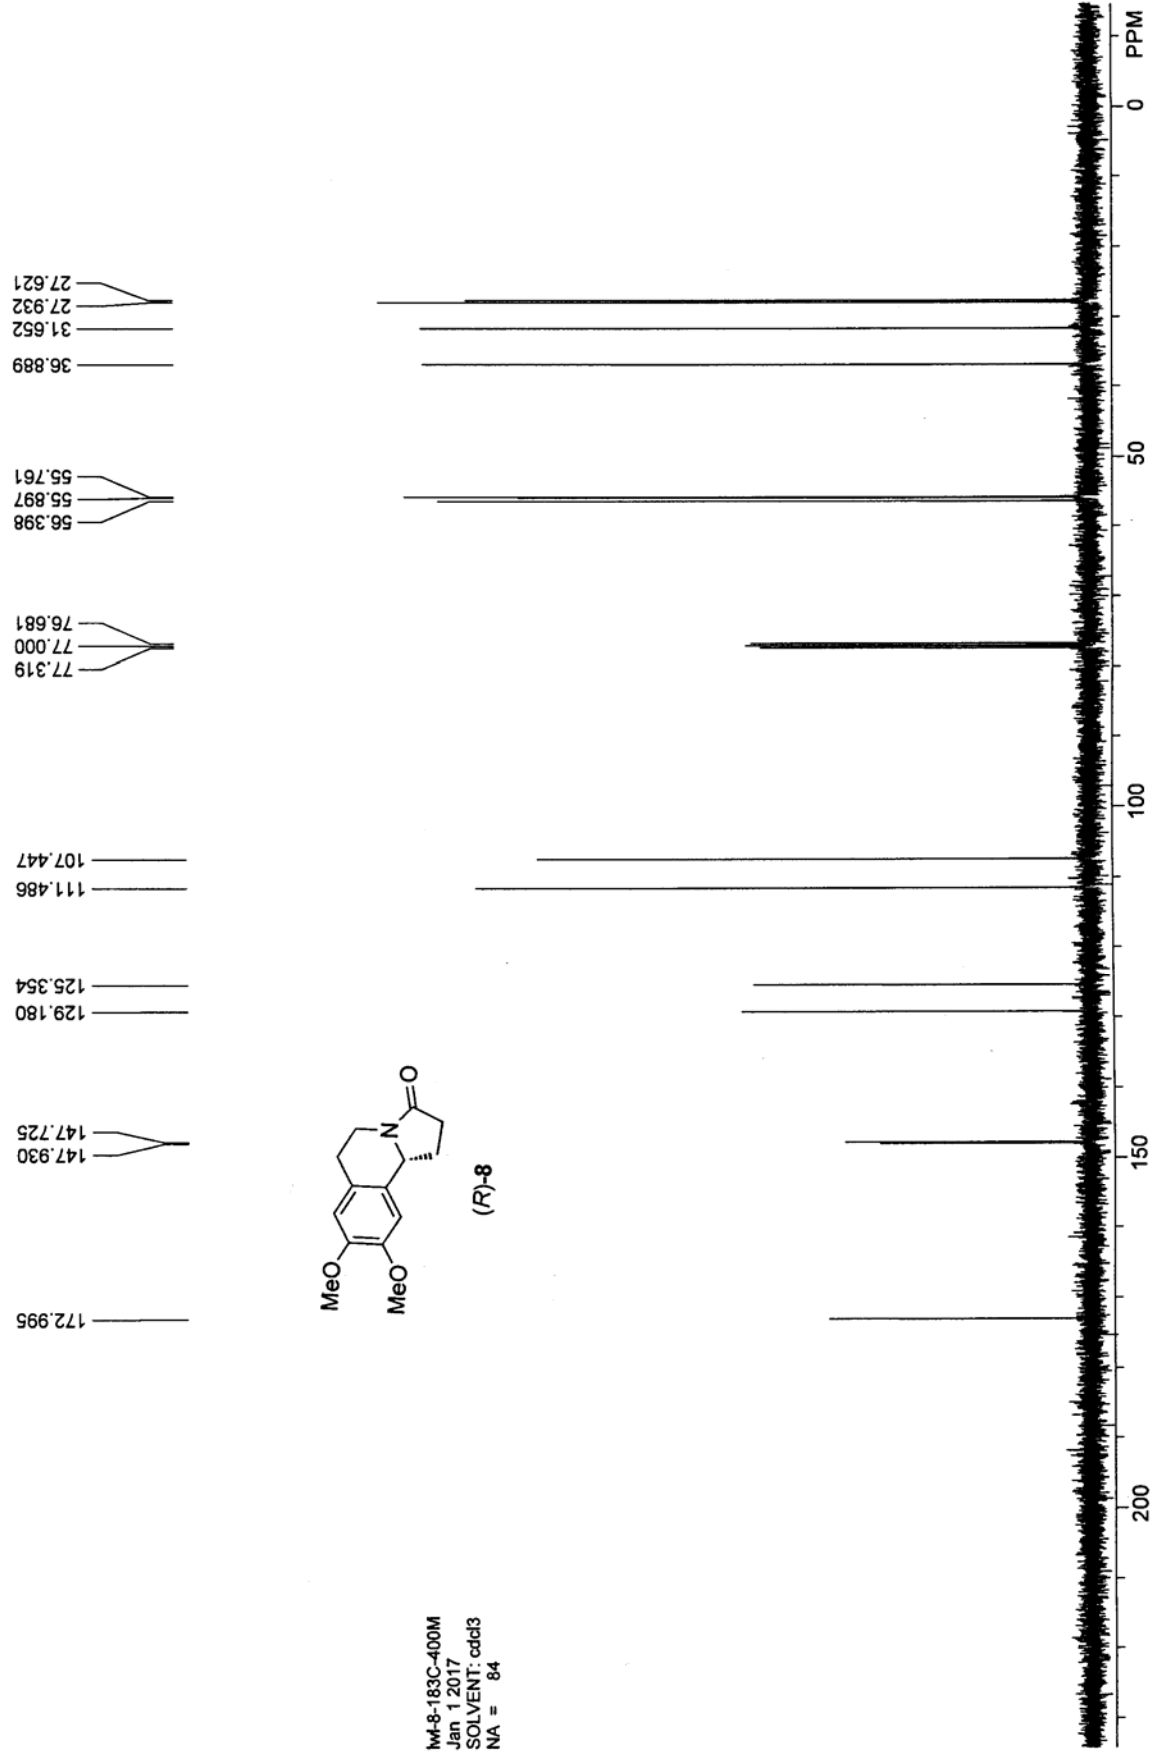

Wt-8-183C-400M  
 Jan 1 2017  
 SOLVENT: cdd3  
 NA = 84

中国科学院上海有机化学研究所

Project Name: defaults for copy

Reported by User: Breeze user (Breeze)

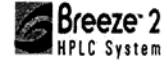

### SAMPLE INFORMATION

|                   |                            |                  |                        |
|-------------------|----------------------------|------------------|------------------------|
| Sample Name:      | W-8-183-as-h-60-40.0.9-214 | Acquired By:     | Breeze                 |
| Sample Type:      | 未知                         | Date Acquired:   | 2016/9/29 16:35:52 CST |
| Val:              | 675                        | Acq. Method:     | zq60                   |
| Injection #:      | 1                          | Date Processed:  | 2017/1/5 14:11:41 CST  |
| Injection Volume: | 10.00 $\mu$ l              | Channel Name:    | W2489 ChA              |
| Run Time:         | 60.00 Minutes              | Channel Desc.:   | W2489 ChA.214nm        |
| Column Type:      |                            | Sample Set Name: |                        |

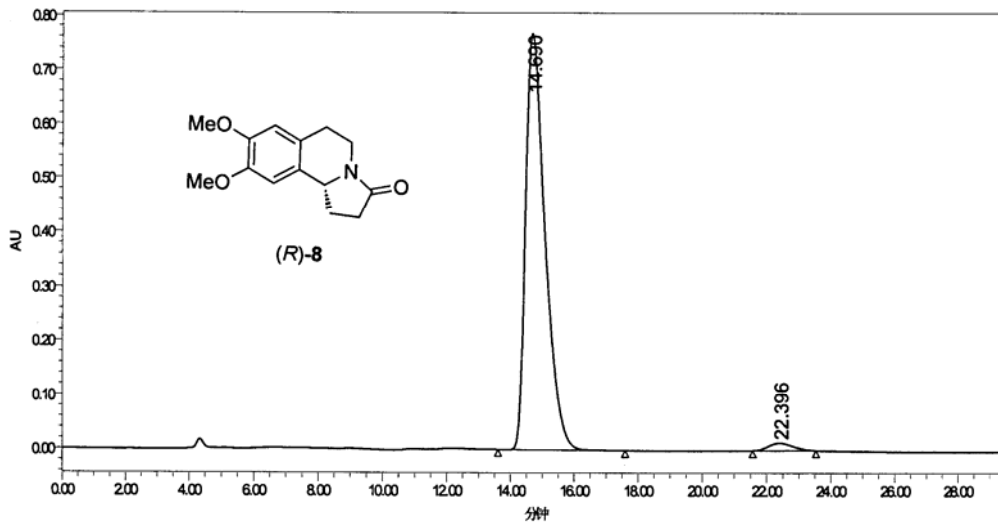

| RT (min) | Area (峰面积) | %Area | Height (峰高) | % Height |
|----------|------------|-------|-------------|----------|
| 14.660   | 32572797   | 97.75 | 766672      | 98.19    |
| 22.396   | 746666     | 2.25  | 14197       | 1.81     |



中国科学院上海有机化学研究所  
 Project Name: defaults for copy  
 Reported by User: Breeze user (Breeze)

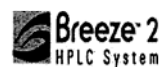

| SAMPLE INFORMATION |                               |                  |                        |
|--------------------|-------------------------------|------------------|------------------------|
| Sample Name:       | WJ-8-103-rac-ash-60-400.9:214 | Acquired By:     | Breeze                 |
| Sample Type:       | 未知                            | Date Acquired:   | 2016/9/29 17:09:52 CST |
| Vial:              | 676                           | Acq. Method:     | zg60                   |
| Injection #:       | 1                             | Date Processed:  | 2016/9/29 17:42:52 CST |
| Injection Volume:  | 10.00 µl                      | Channel Name:    | V2489 ChA              |
| Run Time:          | 30.00 Minutes                 | Channel Desc.:   | V2489 ChA.214mm        |
| Column Type:       |                               | Sample Set Name: |                        |

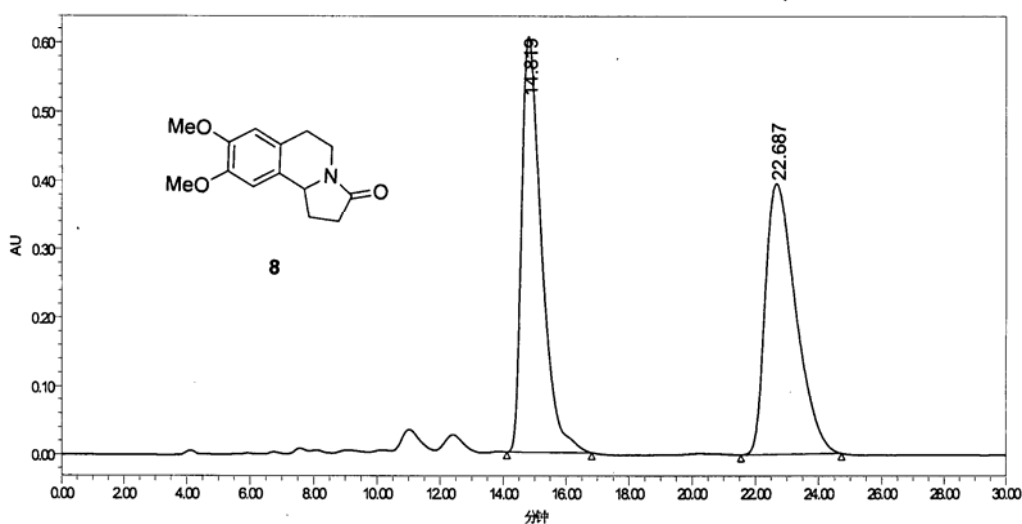

|   | RT<br>(min) | Area<br>(AU*sec) | %Area | Hight<br>(AU) | %<br>Hight |
|---|-------------|------------------|-------|---------------|------------|
| 1 | 14.819      | 25744037         | 50.22 | 605493        | 60.45      |
| 2 | 22.687      | 25513908         | 49.78 | 396185        | 39.55      |

hw-8-184H-400M  
Jan 6 2017  
SOLVENT: dmso  
NA = 8

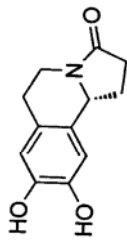

(R)-(+)-oleracein E

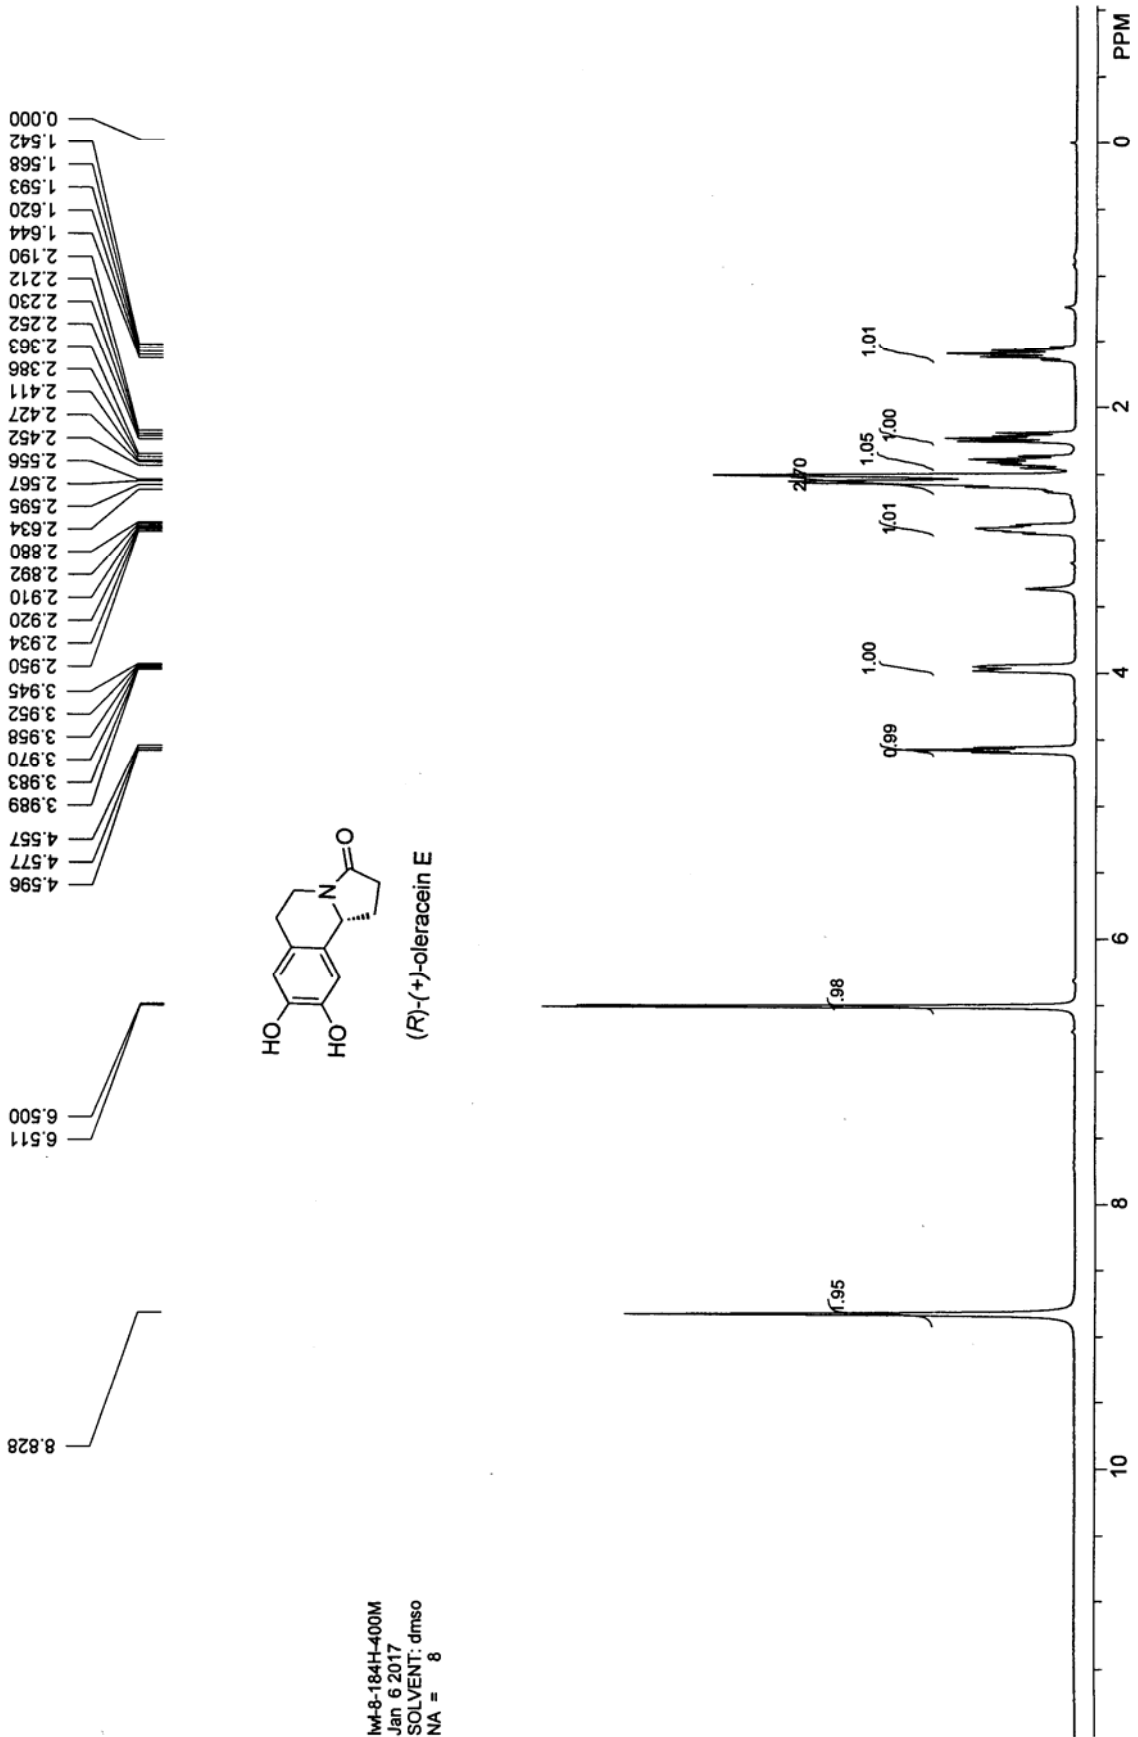

HW-8-184C-400M  
Jan 4 2017  
SOLVENT: DMSO  
NA = 488

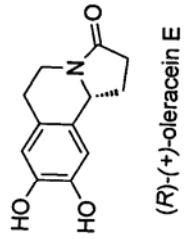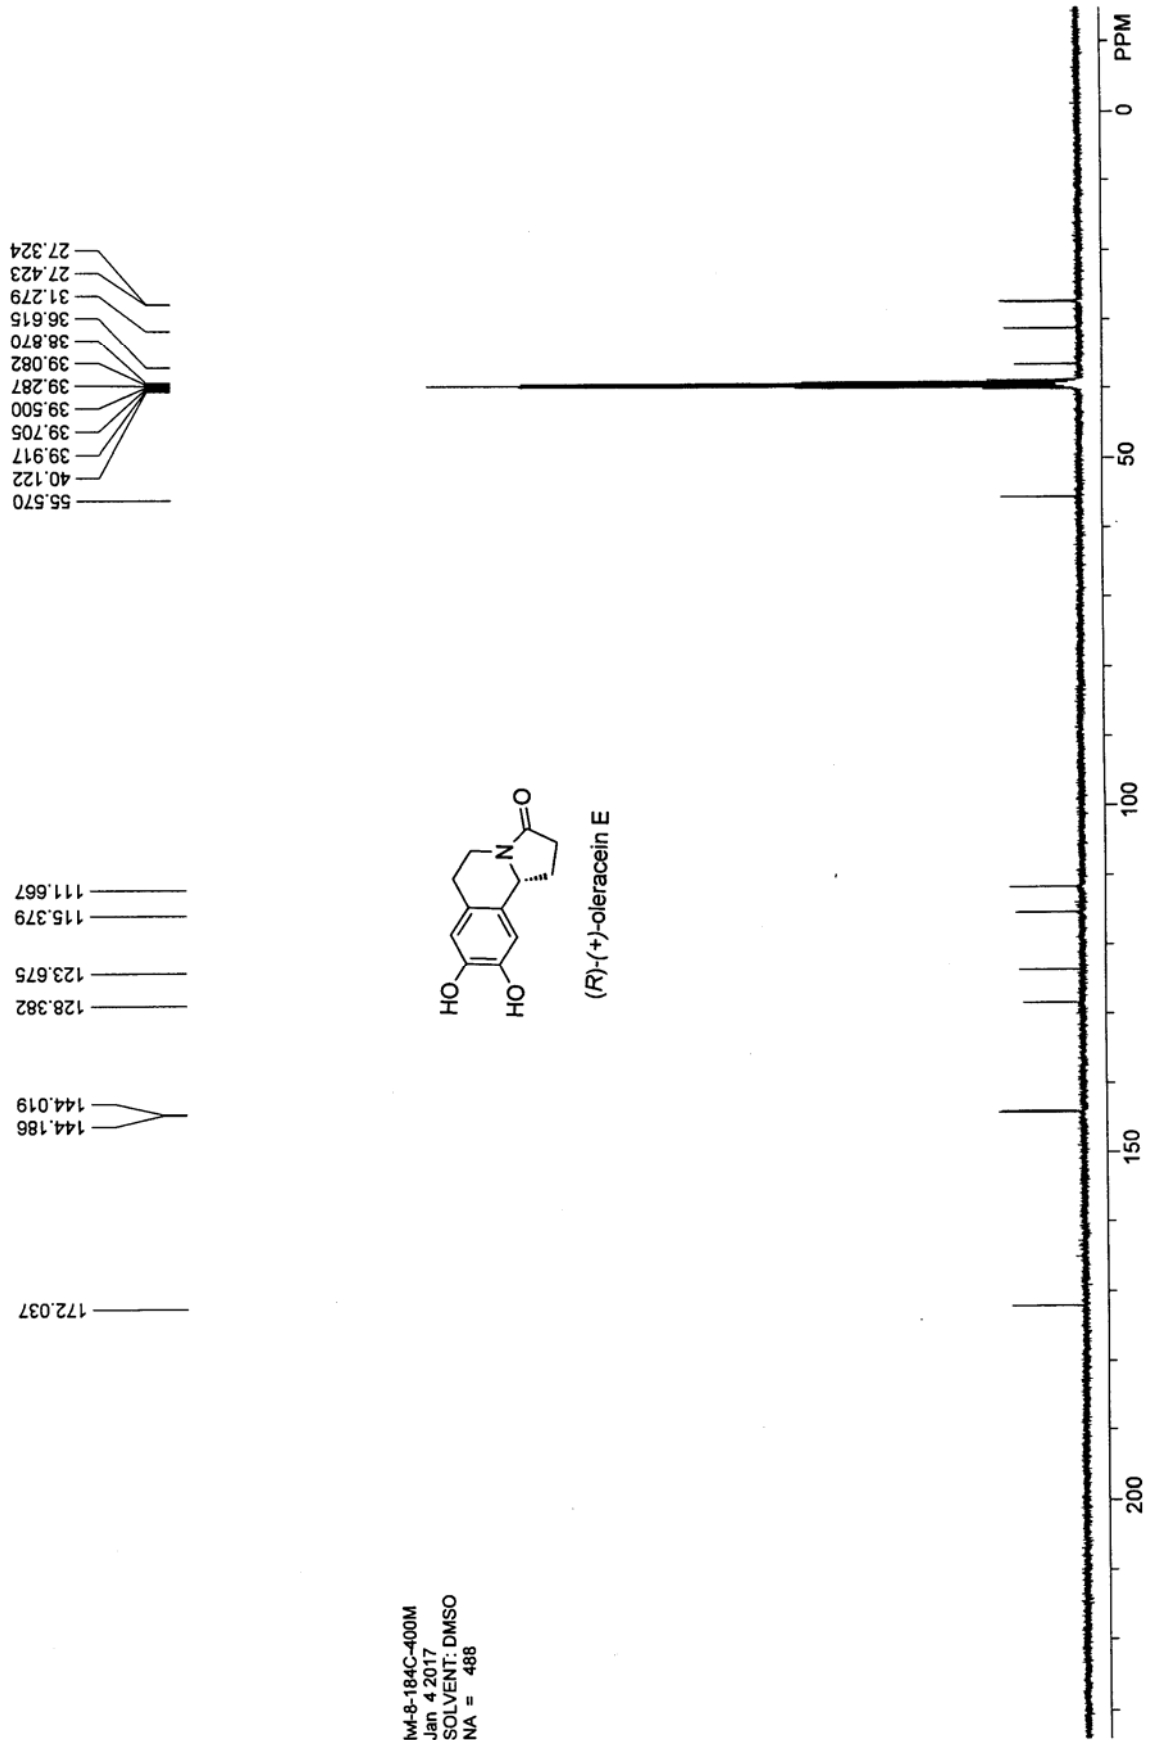

中国科学院上海有机化学研究所  
 Project Name: defaults for copy  
 Reported by User: Breeze user (Breeze)

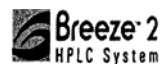

SAMPLE INFORMATION

|                   |                         |                  |                        |
|-------------------|-------------------------|------------------|------------------------|
| Sample Name:      | W-8-184-adh-80-20-1-214 | Acquired By:     | Breeze                 |
| Sample Type:      | 未知                      | Date Acquired:   | 2016/9/30 17:13:11 CST |
| Vial:             | 694                     | Acq. Method:     | zg35                   |
| Injection #:      | 1                       | Date Processed:  | 2016/9/30 17:48:30 CST |
| Injection Volume: | 10.00 $\mu$ l           | Channel Name:    | V2489 ChA              |
| Run Time:         | 30.00 Minutes           | Channel Desc.:   | V2489 ChA.214mm        |
| Column Type:      |                         | Sample Set Name: |                        |

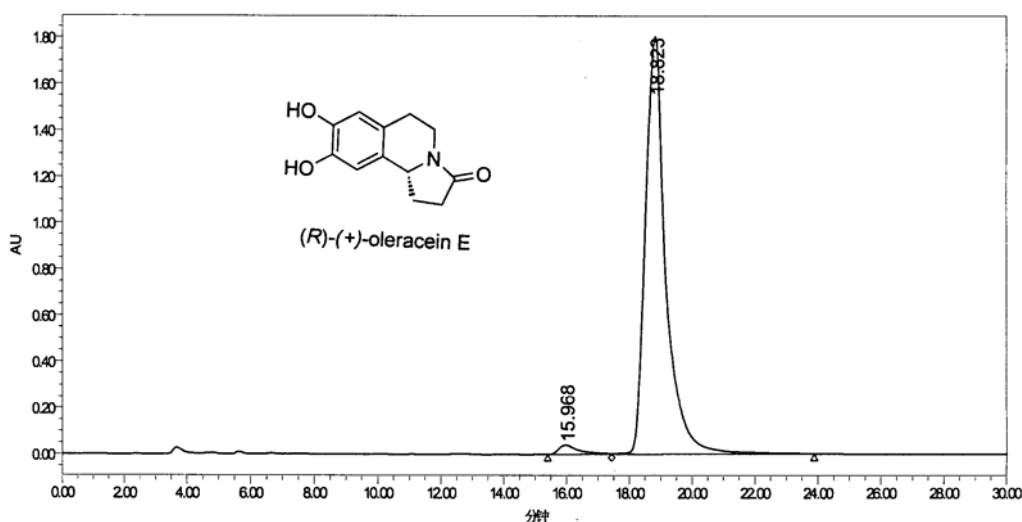

|   | RT (min) | Area (峰面积) | %Area | Height (峰高) | % Height |
|---|----------|------------|-------|-------------|----------|
| 1 | 15.968   | 1851534    | 2.22  | 40872       | 2.21     |
| 2 | 18.822   | 81672921   | 97.78 | 1806808     | 97.79    |

中国科学院上海有机化学研究所  
 Project Name: defaults for copy  
 Reported by User: Breeze user (Breeze)

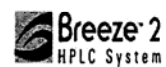

| SAMPLE INFORMATION |                             |                  |                        |
|--------------------|-----------------------------|------------------|------------------------|
| Sample Name:       | W-8-165-rac-adh-80-20-1-214 | Acquired By:     | Breeze                 |
| Sample Type:       | 未知                          | Date Acquired:   | 2016/9/30 16:43:26 CST |
| Vial:              | 663                         | Acq. Method:     | zg85                   |
| Injection #:       | 1                           | Date Processed:  | 2016/9/30 17:46:39 CST |
| Injection Volume:  | 10.00 $\mu$ l               | Channel Name:    | W2489 ChA              |
| Run Time:          | 62.00 Minutes               | Channel Desc.:   | W2489 ChA.214mm        |
| Column Type:       |                             | Sample Set Name: |                        |

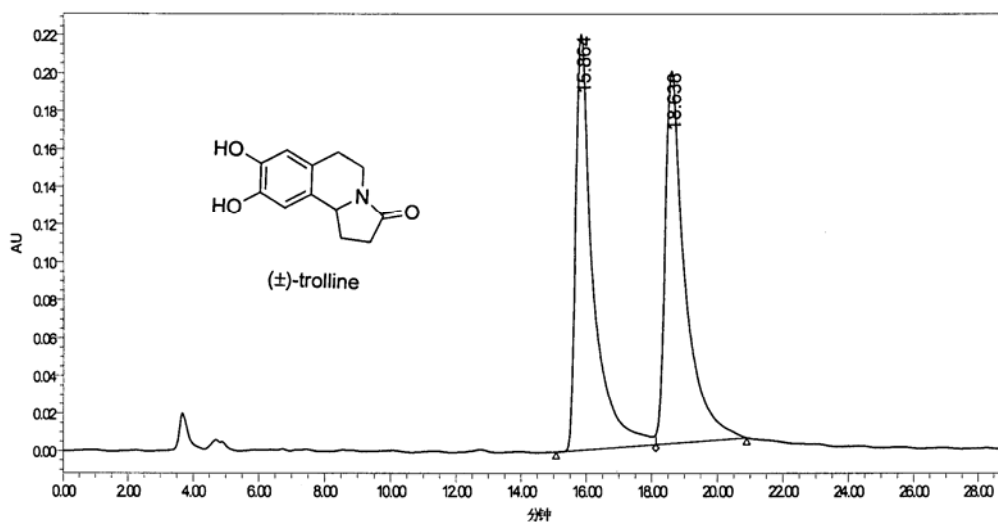

|   | RT (min) | Area (峰面积) | % Area | Height (峰高) | % Height |
|---|----------|------------|--------|-------------|----------|
| 1 | 15.864   | 8230316    | 49.72  | 219908      | 52.75    |
| 2 | 18.638   | 8322817    | 50.28  | 197008      | 47.25    |
